# Supplementary material for: Theoretical study on the catalytic mechanism of human deoxyhypusine hydroxylase
Source: Royal Society of Chemistry journal article supplement (doi:10.1039/d0cp03598j), 2020-01-01
Supplement: d0cp03598j1.pdf [file d0cp03598j1.pdf]

## Support Information

# Theoretical Study on Catalytic Mechanism of Human Deoxyhypusine Hydroxylase

Junkai Wang,<sup>a</sup> Yan Ma,<sup>a</sup> Xixi Wang,<sup>a</sup> Ying Zhang,<sup>a</sup> Hongwei Tan,<sup>\*a</sup> Xichen Li<sup>\*a</sup> and Guangju Chen<sup>\*a</sup>

Key Laboratory of Theoretical and Computational Photochemistry

College of Chemistry

Beijing Normal University

Beijing 100875, China

E-mail: hongwei.tan@bnu.edu.cn

|                                                                                                                                    |     |
|------------------------------------------------------------------------------------------------------------------------------------|-----|
| Section 1. Geometric structures of intermediates and transition states along the catalytic reaction process of hDOHH. ....         | S1  |
| Section 2. Atomic spin populations of the intermediates and transition states along the catalytic reaction pathways of hDOHH. .... | S7  |
| Section 3. The relative energies of different electronic states of Int A and C. ....                                               | S9  |
| Section 4. Cartesian coordinates of the important stationary point structures. ....                                                | S10 |

**Section 1. Geometric structures of intermediates and transition states along the catalytic reaction process of hDOHH.**

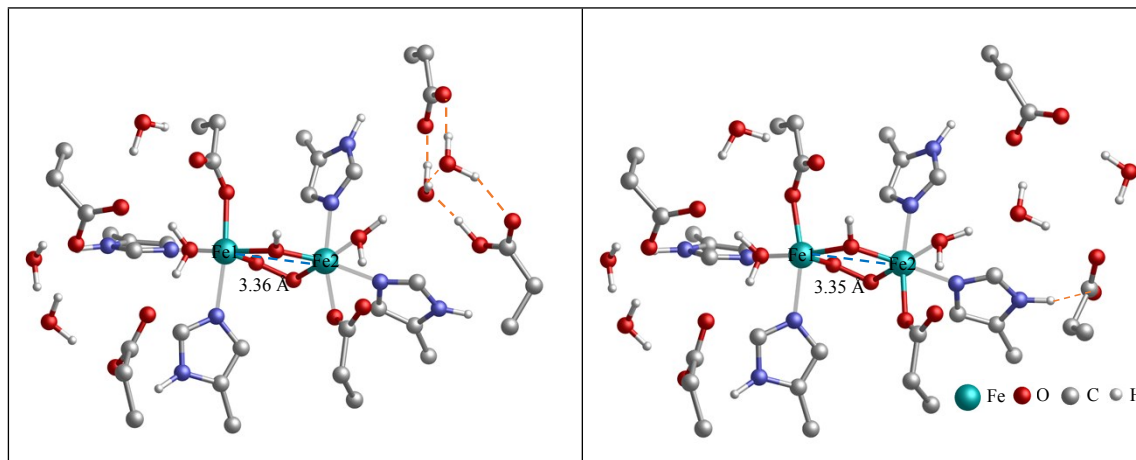

**Fig. S1** The geometric structures of Int A in protonated (left) and unprotonated (right) states.

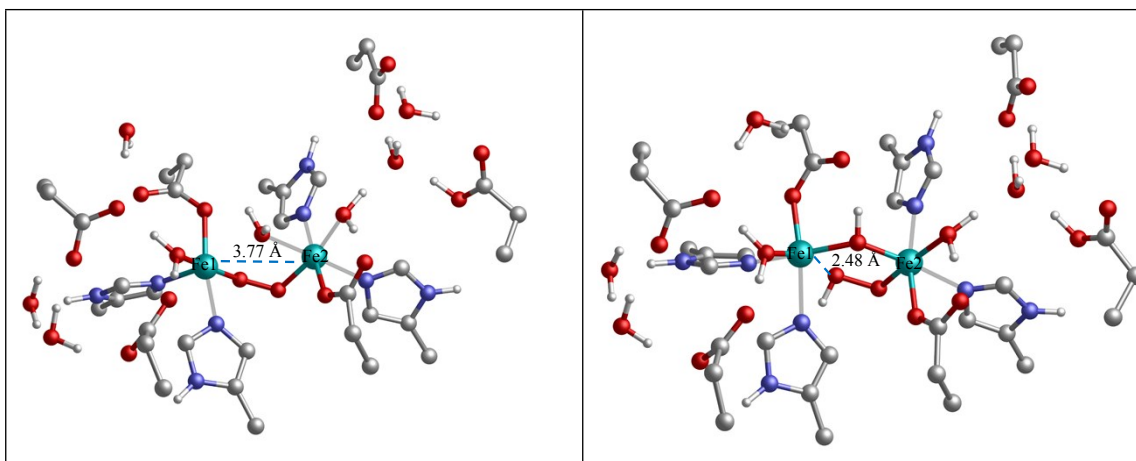

**Fig. S2** Geometric structures of Int A with one protonate added to the bridge hydroxo group (left) or peroxy group (right) respectively.

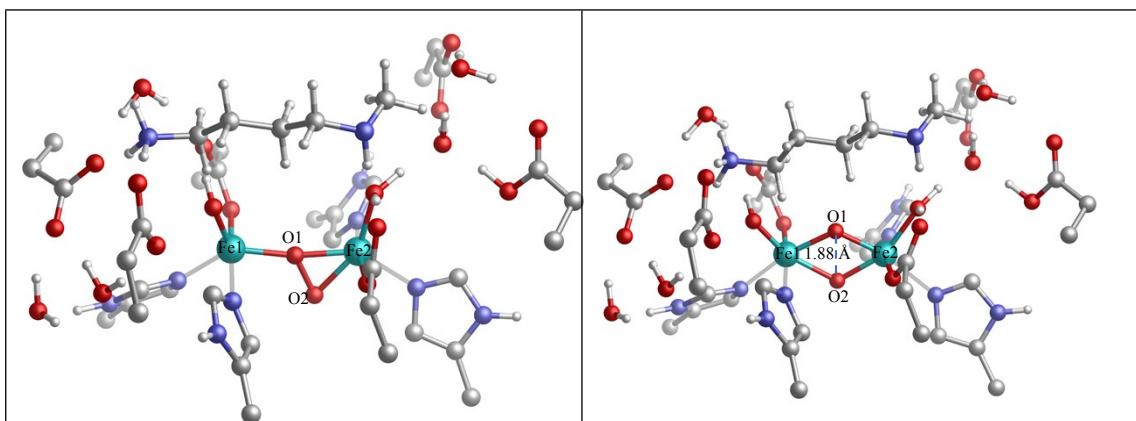

**Fig. S3** The geometric structures of Int C (left) and TS<sub>CD</sub> (right).

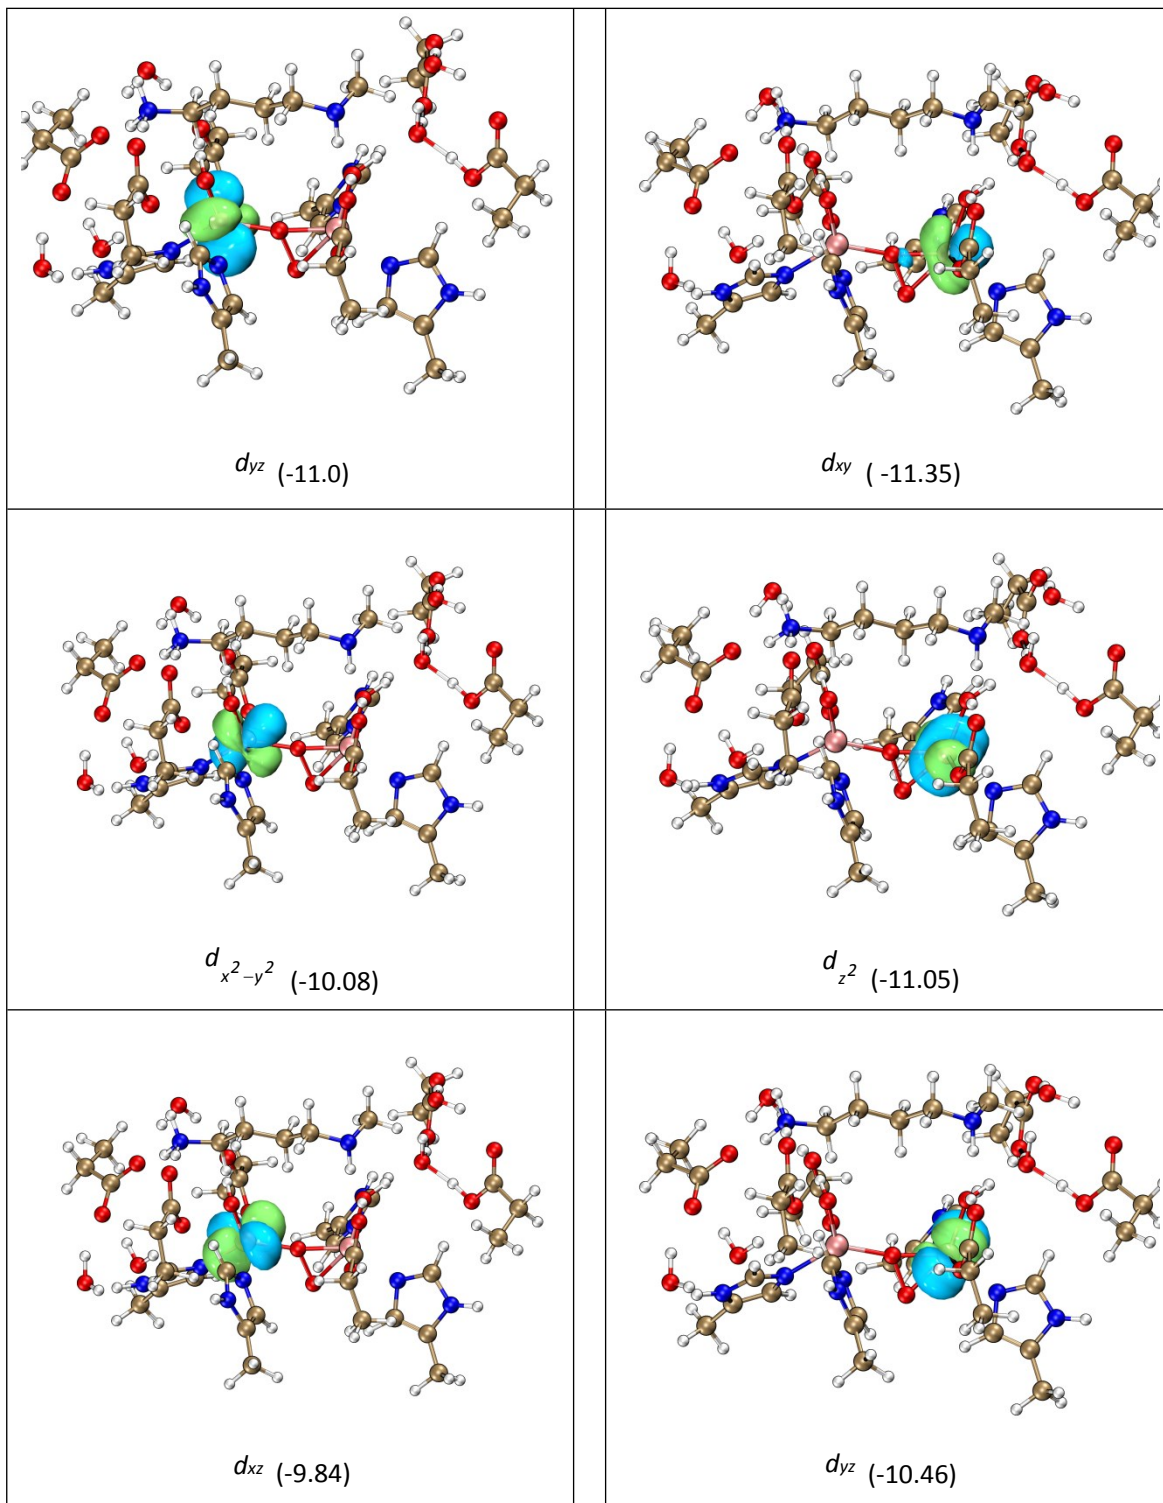

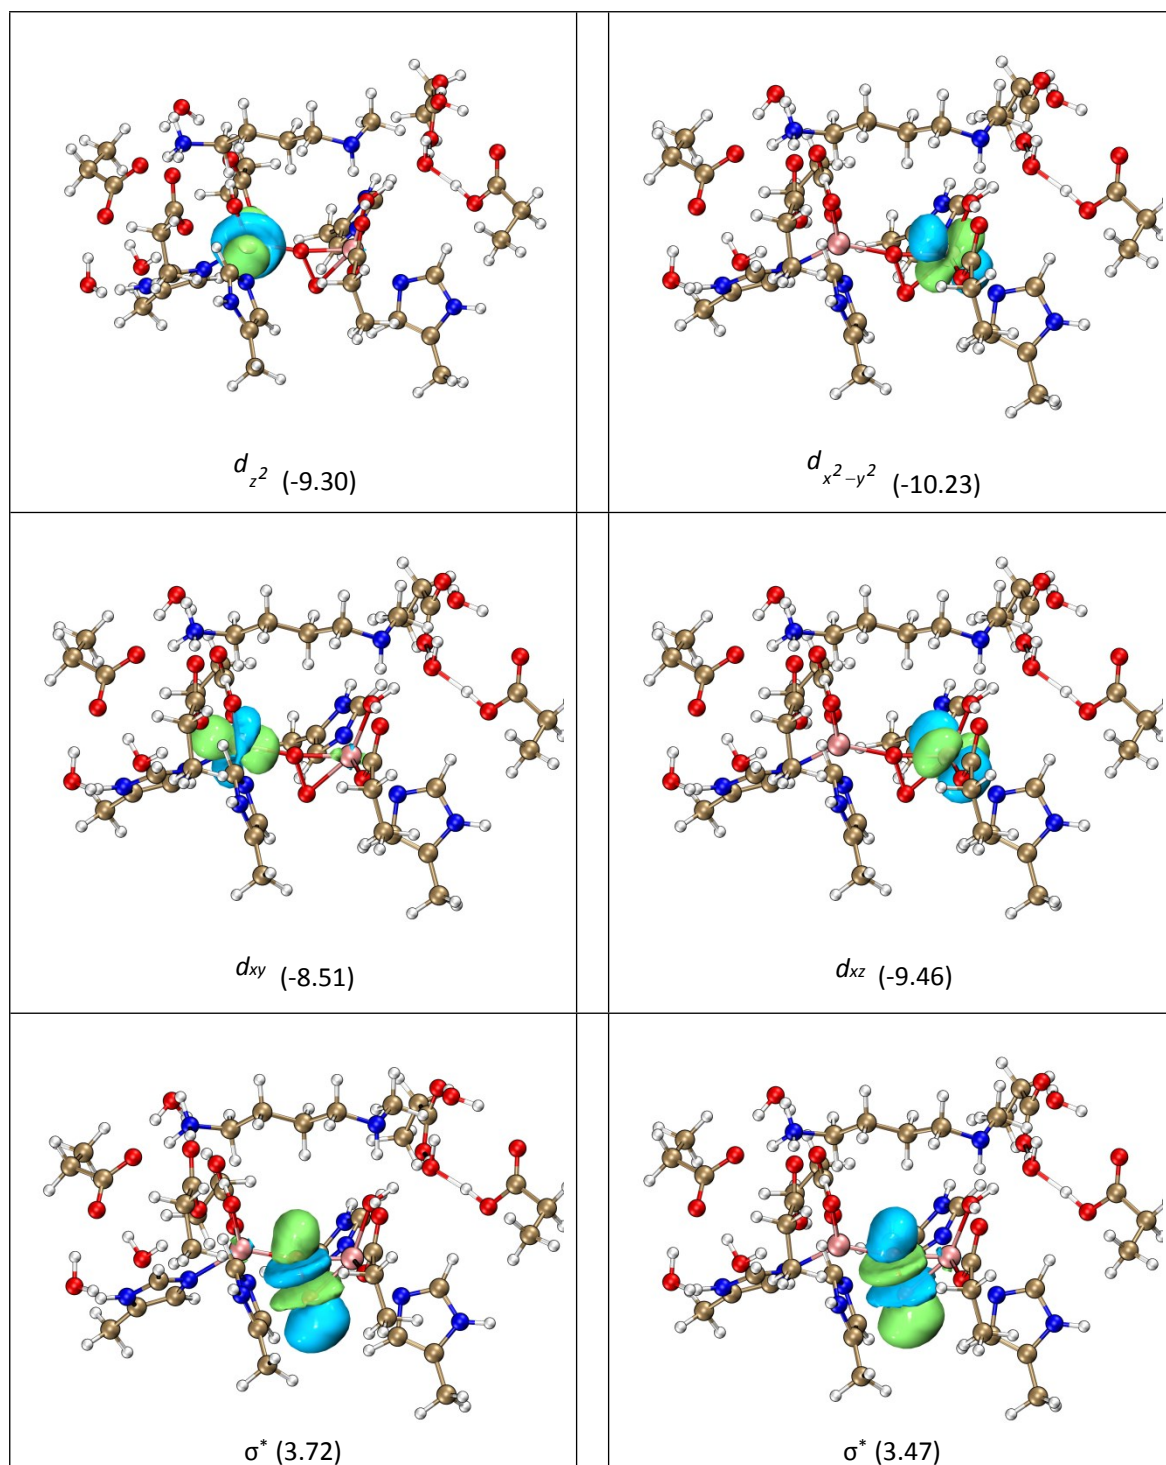

**Fig. S4** The frontier molecular orbitals (FMOs) of Int C. Left panel lists  $\alpha$  orbitals and right panel lists  $\beta$  orbitals. The energy level (in eV) of these orbitals are labeled.

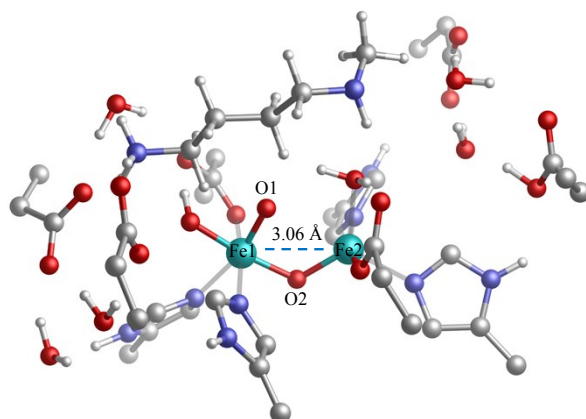

**Fig. S5** The geometric structure of Int D<sub>open1</sub>.

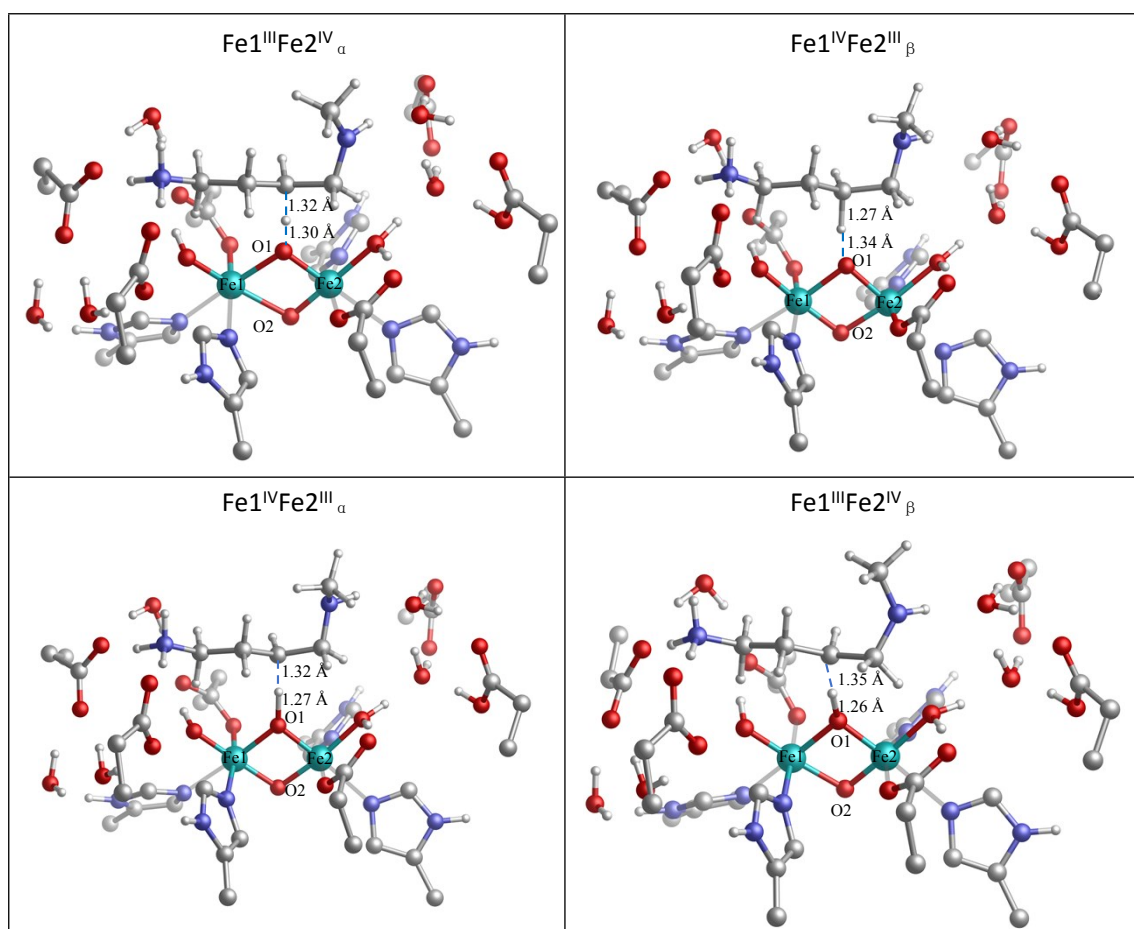

**Fig. S6** The geometric structures of TS<sub>D<sub>E</sub></sub> in different electronic states. Distances (in Å) of Cy-H and O1-H are labeled in the structures.

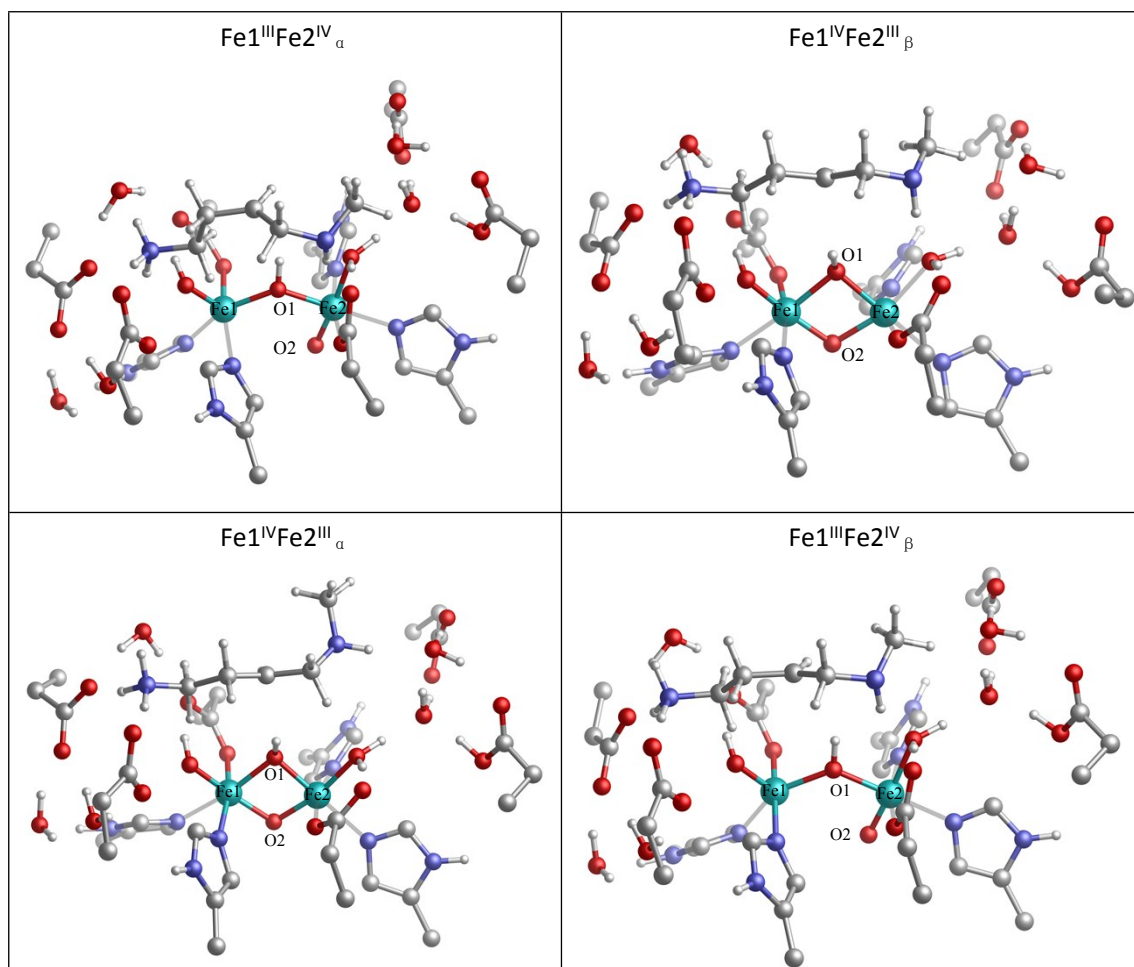

**Fig. S7** The geometric structures of Int E in different electronic states.

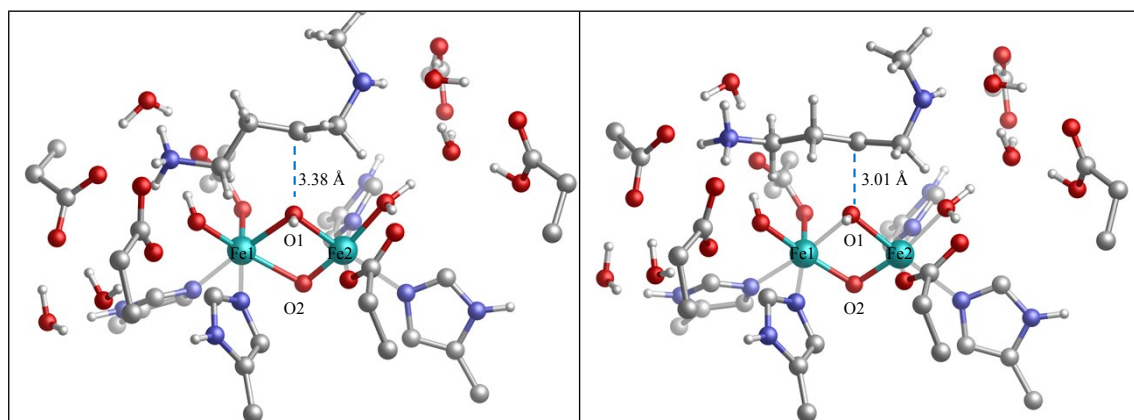

**Fig. S8** The geometric structures of  $\text{TS}_{\text{EF}}$  ( $\text{Fe1}^{\text{III}}\text{Fe2}^{\text{IV}}_{\alpha}$ ) (left) and  $\text{TS}_{\text{EF}}$  ( $\text{Fe1}^{\text{IV}}\text{Fe2}^{\text{III}}_{\beta}$ ) (right) with Cy-O1 distances marked.

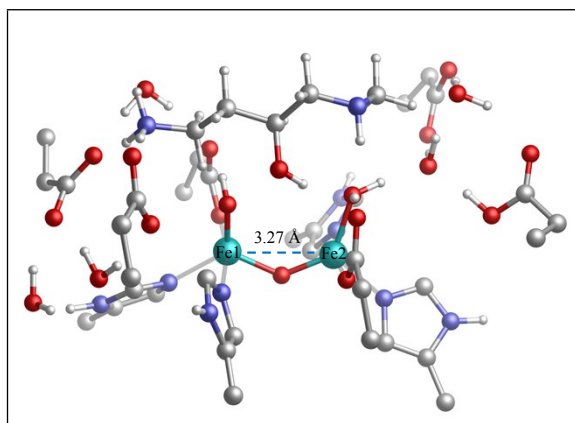

**Fig. S9** The geometric structure of product F (pro F). The Fe-Fe distance is 3.27 Å in this structure.

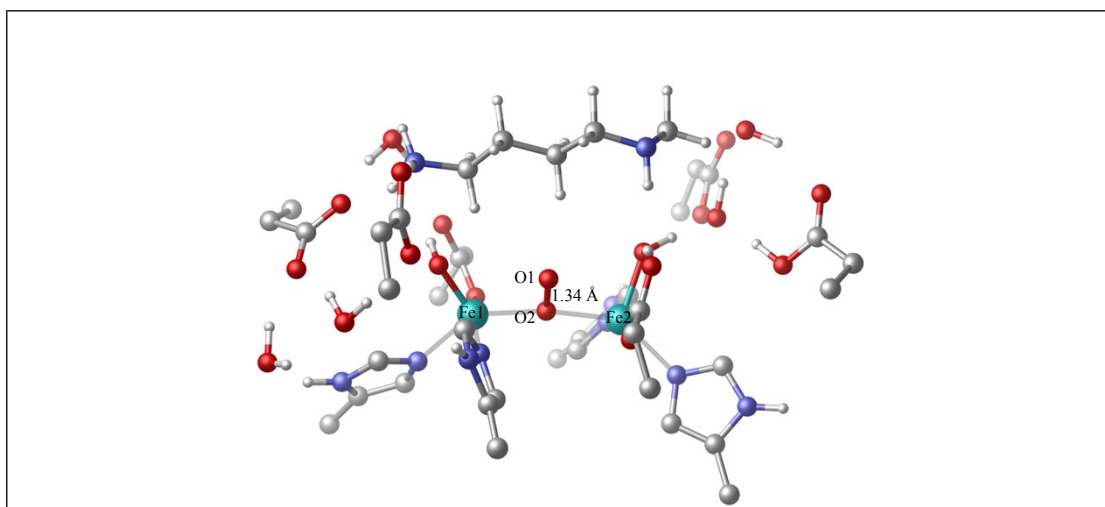

**Fig. S10** The geometric structure of Int D1 with O-O distance labelled.

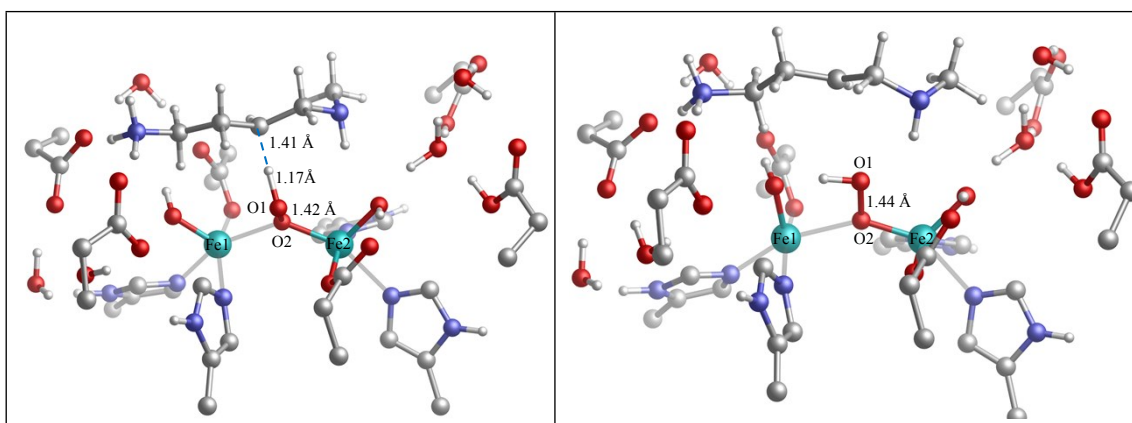

**Fig. S11** The left panel shows the geometric structure of  $TS_{CE1-\beta}$ , in which a  $\beta$  electron is transferred to the Fe1. The right panel presents the corresponding structure of Int  $E1_{\beta}$ .

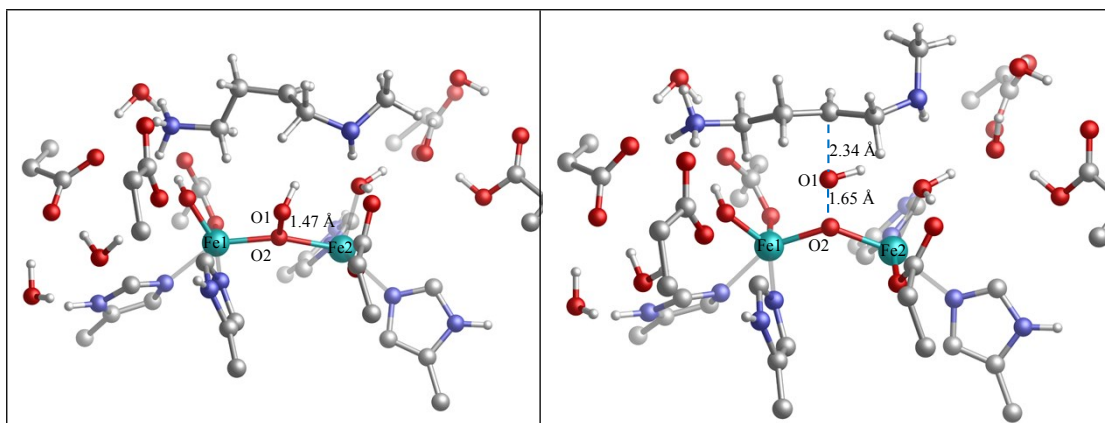

**Fig. S12** The structures of Int E1 $_{\alpha}$  and TS $_{EF1-\alpha}$ . The distance of O1-O2 in the Int E1 $_{\alpha}$  is 1.47 Å. The distances of Cy-O1 and O1-O2 are 2.34 Å and 1.65 Å, respectively.

## Section 2. Atomic spin populations of the intermediates and transition states along the catalytic reaction pathways of hDOHH.

**Table S1** The atomic spin populations on the ligation atoms of two Fe ions.

| species                                                            | Fe1  | O <sub>Glu90</sub> | N <sub>His89</sub> | N <sub>His207</sub> | O <sub>OH/WAT2001</sub> | Fe2   | O <sub>Glu241</sub> | N <sub>His240</sub> | N <sub>His56</sub> | O <sub>WAT2002</sub> |
|--------------------------------------------------------------------|------|--------------------|--------------------|---------------------|-------------------------|-------|---------------------|---------------------|--------------------|----------------------|
| Int A                                                              | 4.19 | 0.11               | 0.07               | 0.07                | 0.05                    | -4.10 | -0.08               | -0.04               | -0.06              | -0.05                |
| Int B                                                              | 4.10 | 0.10               | 0.07               | 0.07                | 0.02                    | -4.16 | -0.10               | -0.06               | -0.07              | -0.07                |
| Int B'                                                             | 4.10 | 0.11               | 0.09               | 0.07                | 0.35                    | -4.03 | -0.09               | -0.07               | -0.06              | -0.08                |
| Int C                                                              | 4.10 | 0.11               | 0.08               | 0.07                | 0.41                    | -4.11 | -0.10               | -0.06               | -0.07              | -0.08                |
| TS <sub>CD</sub>                                                   | 3.87 | 0.11               | 0.06               | 0.08                | 0.33                    | -4.11 | -0.12               | -0.04               | -0.08              | -0.10                |
| Int D <sub>diamond</sub>                                           | 3.41 | 0.10               | 0.04               | 0.08                | 0.14                    | -3.49 | -0.12               | -0.01               | -0.10              | -0.04                |
| Int D <sub>open2</sub>                                             | 4.11 | 0.11               | 0.07               | 0.07                | 0.41                    | -3.08 | -0.11               | 0.00                | -0.09              | -0.08                |
| TS <sub>DE</sub> (Fe <sup>III</sup> Fe <sup>IV</sup> $_{\alpha}$ ) | 4.12 | 0.1                | 0.06               | 0.06                | 0.35                    | -3.44 | -0.1                | -0.02               | -0.07              | -0.03                |
| TS <sub>DE</sub> (Fe <sup>IV</sup> Fe <sup>III</sup> $_{\beta}$ )  | 3.36 | 0.07               | 0.05               | 0.05                | 0.10                    | -4.1  | -0.11               | -0.03               | -0.07              | -0.06                |
| TS <sub>DE</sub> (Fe <sup>IV</sup> Fe <sup>III</sup> $_{\alpha}$ ) | 3.42 | 0.06               | 0.06               | 0.03                | 0.13                    | -2.98 | -0.09               | 0.00                | -0.06              | -0.01                |
| TS <sub>DE</sub> (Fe <sup>III</sup> Fe <sup>IV</sup> $_{\beta}$ )  | 2.55 | -0.01              | 0.01               | -0.02               | 0.08                    | -3.05 | -0.07               | -0.01               | -0.05              | 0.00                 |
| Int E(Fe <sup>III</sup> Fe <sup>IV</sup> $_{\alpha}$ )             | 4.14 | 0.12               | 0.07               | 0.07                | 0.41                    | -3.13 | -0.08               | -0.04               | -0.06              | 0.00                 |
| Int E(Fe <sup>IV</sup> Fe <sup>III</sup> $_{\beta}$ )              | 3.37 | 0.07               | 0.06               | 0.05                | 0.08                    | -4.19 | -0.1                | -0.05               | -0.08              | -0.07                |
| Int E(Fe <sup>IV</sup> Fe <sup>III</sup> $_{\alpha}$ )             | 3.44 | 0.06               | 0.07               | 0.03                | 0.12                    | -2.83 | -0.08               | 0.00                | -0.06              | 0.01                 |
| Int E(Fe <sup>III</sup> Fe <sup>IV</sup> $_{\beta}$ )              | 2.80 | -0.04              | 0.04               | -0.03               | 0.07                    | -3.13 | -0.08               | -0.03               | -0.07              | 0.01                 |
| TS <sub>EF</sub> (Fe <sup>III</sup> Fe <sup>IV</sup> $_{\alpha}$ ) | 4.16 | 0.11               | 0.07               | 0.06                | 0.35                    | -3.76 | -0.08               | -0.04               | -0.06              | -0.03                |
| TS <sub>EF</sub> (Fe <sup>IV</sup> Fe <sup>III</sup> $_{\beta}$ )  | 3.92 | 0.09               | 0.06               | 0.06                | 0.14                    | -4.13 | -0.08               | -0.04               | -0.07              | -0.05                |
| Pro F                                                              | 4.09 | 0.09               | 0.06               | 0.07                | 0.37                    | -4.09 | -0.09               | -0.07               | -0.07              | -0.08                |
| Int D1                                                             | 4.13 | 0.12               | 0.09               | 0.06                | 0.42                    | -3.76 | -0.05               | -0.03               | -0.02              | -0.07                |
| TS <sub>CE1-alpha</sub>                                            | 4.11 | 0.13               | 0.07               | 0.06                | 0.40                    | -3.76 | -0.04               | -0.02               | -0.02              | -0.05                |
| TS <sub>CE1-beta</sub>                                             | 3.73 | 0.03               | 0.03               | 0.02                | 0.20                    | -4.10 | -0.14               | -0.05               | -0.05              | -0.25                |
| Int E1 $_{\alpha}$                                                 | 4.13 | 0.12               | 0.08               | 0.06                | 0.40                    | -3.76 | -0.04               | -0.02               | -0.03              | -0.05                |
| Int E1 $_{\beta}$                                                  | 3.74 | 0.04               | 0.03               | 0.02                | 0.11                    | -4.07 | -0.11               | -0.05               | -0.05              | -0.25                |
| TS <sub>EF1-alpha</sub>                                            | 4.09 | 0.11               | 0.06               | 0.06                | 0.40                    | -3.78 | -0.06               | -0.02               | -0.02              | -0.04                |



**Table S2** The atomic spin populations on two iron centers and the substrate of the reaction intermediates and transition states along the reaction pathway I and pathway II of hDOHH.

| Species                                                             | Fe1  | Fe2  | O1    | O2    | Substrate |
|---------------------------------------------------------------------|------|------|-------|-------|-----------|
| Int A                                                               | +4.5 | -4.3 | +0.2  | -0.3  | –         |
| Int B                                                               | +4.4 | -4.5 | +0.3  | -0.2  | –         |
| Int B'                                                              | +4.7 | -4.3 | 0.0   | -0.4  | –         |
| Int C                                                               | +4.8 | -4.4 | -0.1  | -0.3  | –         |
| TS <sub>CD</sub>                                                    | +4.5 | -4.5 | 0.0   | 0.0   | –         |
| Int D <sub>diamond</sub>                                            | +3.8 | -3.8 | 0.0   | 0.0   | –         |
| Int D <sub>open2</sub>                                              | +4.8 | -3.4 | -1.1  | -0.4  |           |
| TS <sub>DE</sub> (Fe <sup>III</sup> Fe <sup>IV</sup> <sub>α</sub> ) | +4.7 | -3.7 | -0.2  | -0.2  | -0.6      |
| TS <sub>DE</sub> (Fe <sup>IV</sup> Fe <sup>III</sup> <sub>β</sub> ) | +3.6 | -4.4 | +0.2  | 0.0   | +0.4      |
| TS <sub>DE</sub> (Fe <sup>IV</sup> Fe <sup>III</sup> <sub>α</sub> ) | +3.7 | -3.1 | -0.2  | 0.0   | -0.4      |
| TS <sub>DE</sub> (Fe <sup>III</sup> Fe <sup>IV</sup> <sub>β</sub> ) | +2.6 | -3.2 | 0.0   | -0.1  | +0.7      |
| Int E (Fe <sup>III</sup> Fe <sup>IV</sup> <sub>α</sub> )            | +4.8 | -3.3 | 0.0   | -0.5  | -1.0      |
| Int E (Fe <sup>IV</sup> Fe <sup>III</sup> <sub>β</sub> )            | +3.6 | -4.5 | 0.0   | 0.0   | +1.0      |
| Int E (Fe <sup>IV</sup> Fe <sup>III</sup> <sub>α</sub> )            | +3.7 | -3.0 | 0.0   | +0.1  | -1.0      |
| Int E (Fe <sup>III</sup> Fe <sup>IV</sup> <sub>β</sub> )            | +2.8 | -3.3 | 0.0   | -0.5  | +1.0      |
| TS <sub>EF</sub> (Fe <sup>III</sup> Fe <sup>IV</sup> <sub>α</sub> ) | +4.8 | -4.0 | 0.0   | -0.2  | -0.7      |
| TS <sub>EF</sub> (Fe <sup>IV</sup> Fe <sup>III</sup> <sub>β</sub> ) | +4.3 | -4.4 | -0.2  | -0.3  | +0.6      |
| Pro F                                                               | +4.7 | -4.4 | –     | -0.3  | –         |
| Int D1                                                              | 4.8  | -3.9 | -0.64 | -0.29 | –         |
| TS <sub>CE1-α</sub>                                                 | +4.8 | -3.9 | -0.4  | 0.0   | -0.6      |
| TS <sub>CE1-β</sub>                                                 | +4.0 | -4.6 | +0.2  | -0.2  | +0.6      |
| Int E1 <sub>α</sub>                                                 | +4.8 | -3.9 | 0.0   | 0.0   | -1.0      |
| Int E1 <sub>β</sub>                                                 | +3.9 | -4.5 | 0.0   | -0.3  | +1.0      |
| TS <sub>EF1-α</sub>                                                 | +4.7 | -3.9 | 0.0   | -0.1  | -0.8      |

### Section 3. The relative energies of different electronic states of Int A and C.

**Scheme S1** The electronic states and corresponding energies of Int A and Int C.

|                  | HH  | HM   | HL   | MM   | ML   | LL   |
|------------------|-----|------|------|------|------|------|
|                  |     |      |      |      |      |      |
| Energy for Int A | 0.0 | 7.4  | 13.1 | 19.5 | 24.9 | 26.7 |
| Energy for Int C | 0.0 | 11.0 | 15.0 | 27.8 | 27.8 | 38.0 |

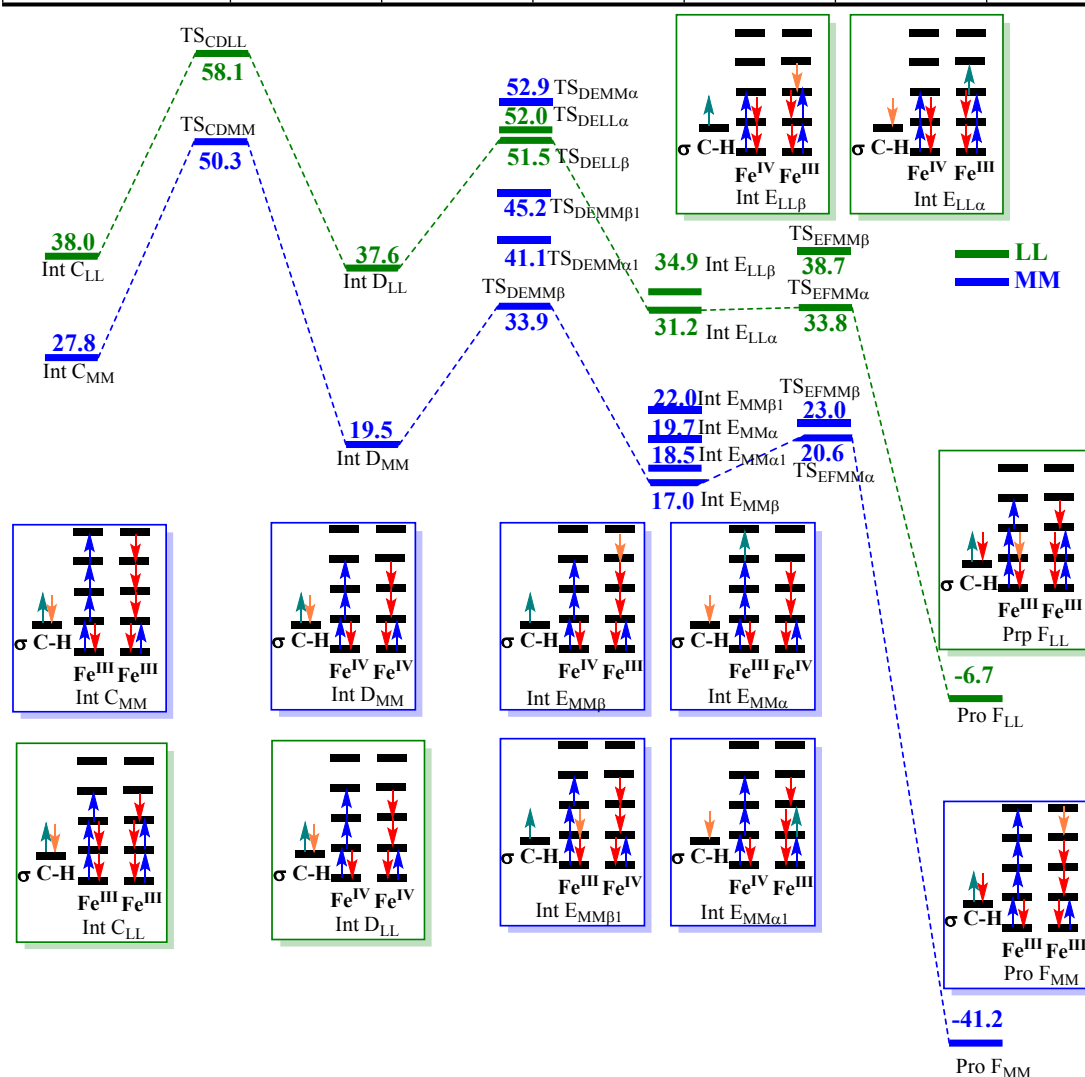

**Fig. S13** The energy profiles of the structures with antiferromagnetically (A) coupled middle spin (M) and low spin (L) diiron core (S=0) along the pathway I. The relative energies (in kcal·mol<sup>-1</sup>) and the electronic states of intermediates are labeled on the figure.

### Section 4. Cartesian coordinates of the important stationary point structures.

Int A

|   |             |             |             |    |             |             |             |
|---|-------------|-------------|-------------|----|-------------|-------------|-------------|
| C | 0.58983300  | 0.61687100  | 0.00001800  | C  | 8.72285000  | 10.21088800 | 5.01099600  |
| C | 0.46547700  | 1.62393800  | 1.10274900  | C  | 8.92923100  | 8.73377900  | 5.33608100  |
| N | -0.32275900 | 1.44976900  | 2.23606100  | C  | 8.42800000  | 7.83994200  | 4.18843200  |
| C | 1.03077000  | 2.86016500  | 1.25904500  | O  | 8.76529300  | 8.22211100  | 3.01316800  |
| C | -0.20093200 | 2.55325000  | 3.01822400  | O  | 7.74890000  | 6.83628900  | 4.49598900  |
| N | 0.60658400  | 3.42934100  | 2.44499300  | C  | -3.65216200 | 8.85487600  | 6.55002400  |
| C | -2.37116600 | -0.87608700 | 4.64499800  | C  | -4.56632400 | 7.66914800  | 6.92039200  |
| C | -2.38450500 | -0.55129900 | 6.13954800  | C  | -3.85737800 | 6.32798600  | 6.99240900  |
| C | -2.26728000 | 0.94556600  | 6.48544300  | O  | -3.83386100 | 5.67112400  | 8.02815800  |
| O | -2.18482700 | 1.75189200  | 5.49807300  | O  | -3.29678800 | 5.97733000  | 5.85192100  |
| O | -2.29303100 | 1.23189200  | 7.70233400  | Fe | 4.44679600  | 4.68493400  | 2.37148500  |
| C | 7.41282800  | 2.90290500  | -2.17101400 | Fe | 1.24727900  | 5.48200800  | 3.00302300  |
| C | 7.05485200  | 3.44565800  | -0.83553100 | O  | 0.49204400  | 5.14538500  | 4.94012700  |
| N | 7.97436100  | 3.68358800  | 0.16765700  | O  | -1.66871600 | 4.13013000  | 6.10981000  |
| C | 5.83342800  | 3.77040300  | -0.30403500 | O  | -1.78016800 | 3.71105600  | 8.69226900  |
| C | 7.30242400  | 4.12872900  | 1.24915800  | O  | 7.29065900  | 0.78616600  | 5.86619100  |
| N | 6.00215100  | 4.19443400  | 0.99430200  | O  | 10.62068400 | 3.96739100  | 0.73866700  |
| C | 4.44181600  | 0.09288900  | 1.14499800  | O  | 10.60794200 | 6.34901700  | 2.11768500  |
| C | 4.13925100  | 0.33709200  | 2.63173200  | H  | 1.59854800  | 0.64360500  | -0.41922700 |
| C | 4.58958300  | 1.72590200  | 3.11416300  | H  | -0.11922200 | 0.80529900  | -0.81744100 |
| O | 4.11723600  | 2.69870800  | 2.40559900  | H  | 1.75940300  | 3.36565200  | 0.64379000  |
| O | 5.32067800  | 1.84184600  | 4.10329900  | H  | -0.70238400 | 2.63813300  | 3.97062700  |
| C | -2.63617500 | 8.68886600  | 0.02597800  | H  | -2.96873000 | -1.77287600 | 4.43207400  |
| C | -2.03974900 | 7.70804700  | 0.99107600  | H  | -2.80554500 | -0.04112600 | 4.08868500  |
| N | -2.63616600 | 7.39511700  | 2.20709800  | H  | -1.59077900 | -1.07808700 | 6.68097300  |
| C | -0.87434200 | 6.98148400  | 0.98559900  | H  | -3.32262900 | -0.89221000 | 6.59504800  |
| C | -1.82841000 | 6.52492300  | 2.87182300  | H  | 8.26938000  | 3.43159600  | -2.60837800 |
| N | -0.75757500 | 6.25506300  | 2.15421900  | H  | 6.56892000  | 3.02766200  | -2.85718100 |
| C | 1.06183100  | 10.26886400 | 3.42699800  | H  | 4.85290900  | 3.72989800  | -0.75485500 |
| C | 1.68273100  | 9.53555200  | 4.61776400  | H  | 7.80648400  | 4.36496100  | 2.17934000  |
| C | 1.27022300  | 8.06653100  | 4.65564300  | H  | 4.02799200  | -0.86555300 | 0.80664900  |
| O | 1.33627900  | 7.46995800  | 3.52382200  | H  | 4.01278200  | 0.89741700  | 0.54208200  |
| O | 0.90700300  | 7.55700900  | 5.73952100  | H  | 4.62289900  | -0.41722500 | 3.25935100  |
| C | 9.54281100  | 0.93491200  | 3.35500400  | H  | 3.05629400  | 0.26993400  | 2.79833100  |
| C | 10.12999800 | 2.00114500  | 4.29311600  | H  | -3.58648200 | 8.33606700  | -0.39657400 |
| C | 9.23228700  | 3.23880300  | 4.17594200  | H  | -1.94453300 | 8.85308400  | -0.80370500 |
| O | 9.55069600  | 4.05160300  | 3.24564800  | H  | -0.09106400 | 6.94366200  | 0.24266600  |
| O | 8.20955900  | 3.30406700  | 4.90000300  | H  | -2.04695700 | 6.16210500  | 3.86459100  |
| C | 4.76484700  | 10.35186100 | 1.08097200  | H  | 1.46701700  | 11.28425500 | 3.33259600  |
| C | 5.06557000  | 8.97614000  | 1.56704300  | H  | 1.27479400  | 9.72367000  | 2.50542400  |
| N | 6.34959400  | 8.49039400  | 1.76583000  | H  | 1.41833800  | 10.00301900 | 5.57078100  |
| C | 4.23979300  | 7.89273100  | 1.74354400  | H  | 2.77613100  | 9.55329600  | 4.52688800  |
| C | 6.25460400  | 7.18091600  | 2.06270600  | H  | 8.63202400  | 0.52995200  | 3.80488200  |
| N | 4.99713000  | 6.78092000  | 2.06197200  | H  | 9.28848700  | 1.38193800  | 2.38704700  |

|   |             |             |             |              |             |             |             |
|---|-------------|-------------|-------------|--------------|-------------|-------------|-------------|
| H | 10.14393700 | 1.62476400  | 5.32118000  | H            | -0.86607700 | 0.63787300  | 2.48925000  |
| H | 11.15010800 | 2.26764900  | 3.99478700  | O            | 3.02808400  | 5.06489800  | 3.68180400  |
| H | 3.70644500  | 10.40158300 | 0.80473700  | H            | 3.11835800  | 4.67259400  | 4.55933500  |
| H | 5.34024100  | 10.58194800 | 0.17324000  | H            | 6.54849500  | 5.54307100  | 4.13331500  |
| H | 3.16640500  | 7.82264200  | 1.65826500  | <b>Int B</b> |             |             |             |
| H | 7.12146500  | 6.60393800  | 2.32024500  | C            | -0.11697300 | 0.99112900  | -0.00017100 |
| H | 9.23571300  | 10.86369400 | 5.73153100  | C            | -0.30013800 | 2.00870200  | 1.08561000  |
| H | 9.12176500  | 10.41534200 | 4.01431100  | N            | -0.89824500 | 1.75219600  | 2.31333100  |
| H | 8.43019200  | 8.44240300  | 6.26473700  | C            | 0.08354300  | 3.31990200  | 1.15643200  |
| H | 10.00247100 | 8.53425500  | 5.45969100  | C            | -0.84611200 | 2.87723400  | 3.06806400  |
| H | -2.76474300 | 8.89009700  | 7.18808900  | N            | -0.25120000 | 3.84813200  | 2.39025800  |
| H | -3.31925700 | 8.80703400  | 5.51082500  | C            | -3.07781700 | -0.50153100 | 4.64512800  |
| H | -5.02512000 | 7.83775700  | 7.89820400  | C            | -3.07956000 | -0.16940000 | 6.13672600  |
| H | -5.37594500 | 7.59160200  | 6.18232900  | C            | -2.84428600 | 1.31214000  | 6.47609400  |
| H | -0.29225100 | 4.69294700  | 5.33715800  | O            | -2.72448600 | 2.10845300  | 5.48074700  |
| H | 0.61854100  | 6.03499200  | 5.40200000  | O            | -2.82578300 | 1.60752400  | 7.68953700  |
| H | -1.94493200 | 3.16008500  | 5.85689800  | C            | 6.70672300  | 3.27727100  | -2.17085000 |
| H | -1.50228400 | 4.06285000  | 7.09981600  | C            | 6.28684500  | 3.91595200  | -0.89647400 |
| H | -2.61154500 | 4.21590500  | 8.67256300  | N            | 7.06917600  | 4.79868700  | -0.17054300 |
| H | -2.01910500 | 2.78327700  | 8.43701800  | C            | 5.06601500  | 3.92362300  | -0.28272900 |
| H | 6.49588000  | 0.88400500  | 5.31419700  | C            | 6.32135800  | 5.30780200  | 0.82529000  |
| H | 7.69098500  | 1.66889200  | 5.72855000  | N            | 5.09463400  | 4.79725700  | 0.78548700  |
| H | 10.66262800 | 4.94046600  | 0.88836400  | C            | 3.73559900  | 0.46713400  | 1.14590500  |
| H | 10.40787000 | 3.69972500  | 1.66509000  | C            | 3.40105400  | 0.86652100  | 2.58999500  |
| H | 9.94704300  | 7.06277800  | 2.24476200  | C            | 3.44999900  | 2.36917900  | 2.87659200  |
| H | 10.30447300 | 5.67736100  | 2.76049400  | O            | 3.23899100  | 3.12635100  | 1.85836000  |
| O | 5.96013000  | 4.77248000  | 3.94625800  | O            | 3.61859900  | 2.77968500  | 4.04391900  |
| H | 6.47923500  | 3.99342100  | 4.24876900  | C            | -3.34290100 | 9.06304400  | 0.02592100  |
| H | -2.66924100 | 5.12687300  | 5.97773700  | C            | -2.80683100 | 8.09045900  | 1.02502900  |
| H | -1.39682300 | -1.07763300 | 4.25137400  | N            | -3.42787200 | 7.81809900  | 2.23813100  |
| H | 0.40620800  | -0.37350500 | 0.36094800  | C            | -1.64440400 | 7.37093800  | 1.06168500  |
| H | 5.49809900  | 0.07607900  | 0.97490700  | C            | -2.63552100 | 6.97516700  | 2.95024100  |
| H | 7.65797900  | 1.86146400  | -2.15410700 | N            | -1.54807900 | 6.68815300  | 2.25936800  |
| H | 10.23077600 | 0.13870200  | 3.16060900  | C            | 0.35513700  | 10.64327000 | 3.42699400  |
| H | 7.68858400  | 10.48493500 | 5.02438900  | C            | 0.98039100  | 9.91056800  | 4.62017600  |
| H | 4.93700700  | 11.15594000 | 1.76569400  | C            | 0.62272300  | 8.42693800  | 4.66490100  |
| H | -0.00002900 | 10.35531200 | 3.52655200  | O            | 0.71448200  | 7.81027600  | 3.54432300  |
| H | -2.81455800 | 9.63060200  | 0.50170800  | O            | 0.28652200  | 7.90533800  | 5.75391400  |
| H | -4.23014000 | 9.74019500  | 6.71460600  | C            | 8.83508500  | 1.30886500  | 3.35419900  |
| O | 3.12911300  | 4.95162300  | 0.96475600  | C            | 9.53954600  | 2.62250300  | 3.01916300  |
| O | 2.01086900  | 5.72700200  | 1.28887800  | C            | 8.74247100  | 3.92014600  | 3.19553900  |
| H | -3.51290100 | 7.74927200  | 2.55695600  | O            | 9.31934200  | 4.96200700  | 2.76433700  |
| H | 7.24091600  | 8.95363200  | 1.94176200  | O            | 7.61280400  | 3.88390600  | 3.76031700  |
| H | 9.02012200  | 3.67580400  | 0.16335900  | C            | 4.05789600  | 10.72613200 | 1.08082400  |

|    |             |             |             |   |             |             |             |
|----|-------------|-------------|-------------|---|-------------|-------------|-------------|
| C  | 4.15413700  | 9.36514700  | 1.68204600  | H | 0.57318900  | 10.10342700 | 2.50288500  |
| N  | 5.09987800  | 8.97050700  | 2.61681500  | H | 0.69347300  | 10.36472000 | 5.57255700  |
| C  | 3.45440000  | 8.22515900  | 1.38400100  | H | 2.07429200  | 9.96621200  | 4.54690300  |
| C  | 4.95325500  | 7.64819200  | 2.84130000  | H | 8.51070800  | 1.26636800  | 4.39703500  |
| N  | 3.96714500  | 7.16507200  | 2.10600000  | H | 7.94862000  | 1.16166900  | 2.72916900  |
| C  | 8.01604600  | 10.58505100 | 5.01127100  | H | 10.44311600 | 2.73533200  | 3.63346300  |
| C  | 8.32759000  | 9.53525100  | 6.07588700  | H | 9.90140800  | 2.60835500  | 1.98352400  |
| C  | 7.60108500  | 8.19917500  | 5.86216900  | H | 3.06141500  | 10.86351300 | 0.65235100  |
| O  | 6.99681600  | 8.02830900  | 4.76041200  | H | 4.78144700  | 10.84961100 | 0.26360300  |
| O  | 7.67147500  | 7.36162400  | 6.80469900  | H | 2.60889500  | 8.09017400  | 0.72840000  |
| C  | -4.35864000 | 9.22911700  | 6.55005900  | H | 5.59727300  | 7.12308400  | 3.52536800  |
| C  | -5.19731600 | 8.04356500  | 7.06650700  | H | 8.60121900  | 11.49864100 | 5.17457900  |
| C  | -4.45846600 | 6.71866300  | 7.09821300  | H | 8.25974400  | 10.20622000 | 4.01454000  |
| O  | -4.31184200 | 6.08129600  | 8.13286700  | H | 8.07936600  | 9.89515500  | 7.08088700  |
| O  | -4.00983900 | 6.34560900  | 5.90822900  | H | 9.40329800  | 9.31727700  | 6.09711000  |
| Fe | 3.34134000  | 5.14300000  | 1.85347300  | H | -3.41684300 | 9.32026800  | 7.09871800  |
| Fe | 0.38973400  | 5.88014000  | 2.97367100  | H | -4.12469100 | 9.13026300  | 5.48713400  |
| O  | -0.23340600 | 5.51493600  | 4.89747000  | H | -5.54176100 | 8.23823600  | 8.08499600  |
| O  | -2.31425000 | 4.50882700  | 6.06193500  | H | -6.08548300 | 7.92404000  | 6.43225400  |
| O  | -2.26432300 | 4.07501800  | 8.62528300  | H | -1.03742000 | 5.07495100  | 5.30899000  |
| O  | 6.12350800  | 2.34676900  | 5.55447300  | H | -0.04510300 | 6.37050400  | 5.39376400  |
| O  | 9.55380200  | 5.90888800  | 0.23042500  | H | -2.55073800 | 3.52277100  | 5.81479700  |
| O  | 8.20173900  | 7.34589300  | 2.33341700  | H | -2.12156500 | 4.43760900  | 7.05178700  |
| H  | 0.90533100  | 1.02430300  | -0.38635400 | H | -3.09470200 | 4.57389800  | 8.70791800  |
| H  | -0.79737900 | 1.16436200  | -0.84262900 | H | -2.51423600 | 3.14052200  | 8.40042600  |
| H  | 0.63052600  | 3.90462900  | 0.43493300  | H | 5.22581000  | 2.34255200  | 5.17655200  |
| H  | -1.25012000 | 2.91244100  | 4.06904800  | H | 6.67995600  | 2.67428400  | 4.81832800  |
| H  | -3.67247300 | -1.40193200 | 4.44334600  | H | 9.20678800  | 6.73814500  | 0.60714800  |
| H  | -3.51587500 | 0.32677900  | 4.08261800  | H | 9.72055200  | 5.40215600  | 1.05851300  |
| H  | -2.34269600 | -0.76154800 | 6.69072000  | H | 7.86837100  | 7.77601000  | 3.14426200  |
| H  | -4.04995600 | -0.42672300 | 6.57903000  | H | 8.57500200  | 6.49222700  | 2.66831900  |
| H  | 7.58272800  | 3.79351400  | -2.57947800 | O | 2.22258700  | 5.24741800  | 3.42469200  |
| H  | 5.91020700  | 3.38944700  | -2.91538600 | H | 2.34192300  | 4.46308000  | 3.99110900  |
| H  | 4.17324400  | 3.37355000  | -0.53254500 | H | -3.38499800 | 5.51066300  | 5.99272300  |
| H  | 6.71652300  | 6.03419300  | 1.52548600  | H | -2.10361100 | -0.70374400 | 4.25125700  |
| H  | 3.36132600  | -0.54080900 | 0.93008500  | H | -0.30051500 | 0.00066400  | 0.36107100  |
| H  | 3.27616600  | 1.16519800  | 0.44421000  | H | 4.79107400  | 0.45033800  | 0.97422400  |
| H  | 4.04724000  | 0.36182000  | 3.31442600  | H | 6.95071500  | 2.23554400  | -2.15423000 |
| H  | 2.37418000  | 0.56058600  | 2.83321800  | H | 9.52454300  | 0.51312000  | 3.16120700  |
| H  | -4.28152300 | 8.72742900  | -0.43304100 | H | 6.98173700  | 10.85912500 | 5.02418700  |
| H  | -2.61289800 | 9.21195700  | -0.77234600 | H | 4.23041300  | 11.53005800 | 1.76577100  |
| H  | -0.84800200 | 7.30942600  | 0.33681600  | H | -0.70680700 | 10.72934400 | 3.52654700  |
| H  | -2.88244300 | 6.63638800  | 3.94538200  | H | -3.52135100 | 10.00484200 | 0.50173000  |
| H  | 0.75901600  | 11.65872800 | 3.34100000  | H | -4.93702300 | 10.11432200 | 6.71461500  |

|   |             |            |             |    |             |             |             |
|---|-------------|------------|-------------|----|-------------|-------------|-------------|
| O | 2.04601800  | 5.54070000 | 0.58366500  | C  | 5.10084900  | 3.91607000  | -0.24354400 |
| O | 0.97931100  | 6.24280100 | 1.16940300  | C  | 6.42306100  | 5.12470300  | 0.98917900  |
| C | 0.24761900  | 6.16258900 | 8.92291800  | N  | 5.17270700  | 4.68452900  | 0.89911200  |
| N | 1.18738400  | 7.27503100 | 8.79576500  | C  | 3.76301000  | 0.46877300  | 1.16385200  |
| C | 2.58780100  | 6.86833600 | 8.70922300  | C  | 3.40427700  | 0.71595900  | 2.63178300  |
| C | 3.02452300  | 6.20784800 | 7.38655200  | C  | 3.65225700  | 2.15794300  | 3.06991300  |
| C | 4.50875800  | 5.81537200 | 7.37113500  | O  | 3.23659000  | 3.05049800  | 2.23002700  |
| C | 4.99486400  | 5.51004300 | 5.95551300  | O  | 4.18796000  | 2.38967800  | 4.16750800  |
| N | 6.44635400  | 5.16146400 | 5.93991200  | C  | -3.32028300 | 9.05922200  | 0.03169400  |
| H | 0.43247800  | 5.62704700 | 9.86164400  | C  | -2.92068900 | 8.01890200  | 1.01394100  |
| H | 0.27876500  | 5.41909400 | 8.11101700  | N  | -3.65228100 | 7.71397300  | 2.15395800  |
| H | 0.94731100  | 7.80190900 | 7.95693800  | C  | -1.80368400 | 7.23959100  | 1.09535800  |
| H | 3.21624600  | 7.75666400 | 8.87181900  | C  | -2.96582100 | 6.79772200  | 2.87908000  |
| H | 2.79552900  | 6.19027700 | 9.54957800  | N  | -1.84152300 | 6.49142500  | 2.25569400  |
| H | 2.40707600  | 5.32532300 | 7.18137800  | C  | 0.37318900  | 10.64398000 | 3.43564800  |
| H | 4.67386000  | 4.94393700 | 8.02004300  | C  | 1.00377400  | 9.85022000  | 4.58876300  |
| H | 5.12152400  | 6.63189100 | 7.77516800  | C  | 0.62703300  | 8.36918700  | 4.67370800  |
| H | 4.87587300  | 6.39790500 | 5.33504800  | O  | 0.16856100  | 7.82940700  | 3.59970800  |
| H | 4.44800000  | 4.68223200 | 5.49932900  | O  | 0.81798200  | 7.75622100  | 5.74808100  |
| H | 6.56710700  | 4.24399500 | 6.38686700  | C  | 8.85937200  | 1.31541300  | 3.37681500  |
| H | 6.80855000  | 4.99784700 | 4.97822100  | C  | 9.69232300  | 2.58417000  | 3.60227200  |
| H | -0.77450200 | 6.54842100 | 8.96715000  | C  | 8.88620800  | 3.87050800  | 3.80532800  |
| H | 2.82117200  | 6.91344900 | 6.57054200  | O  | 9.26064200  | 4.88524500  | 3.14824700  |
| H | 7.01135400  | 5.97425600 | 6.36709600  | O  | 7.93705500  | 3.83935900  | 4.63720200  |
| H | -4.31880100 | 8.17251400 | 2.55140600  | C  | 4.07833100  | 10.72800200 | 1.09325800  |
| H | 5.80976000  | 9.51220400 | 3.09251400  | C  | 4.15729100  | 9.37119600  | 1.71746400  |
| H | 8.06449500  | 5.08434200 | -0.26980600 | N  | 4.95327400  | 9.05266900  | 2.81216900  |
| H | -1.33110600 | 0.89279600 | 2.62031900  | C  | 3.55375600  | 8.18902200  | 1.37182200  |
|   |             |            |             | C  | 4.81299500  | 7.73559500  | 3.08082800  |
|   |             |            |             | N  | 3.97188700  | 7.18505800  | 2.22094600  |
|   |             |            |             | C  | 8.03257400  | 10.59194600 | 5.02782700  |
|   |             |            |             | C  | 8.38662000  | 9.62702100  | 6.15298500  |
|   |             |            |             | C  | 7.59191300  | 8.31495500  | 6.09240600  |
|   |             |            |             | O  | 6.92382900  | 8.07116700  | 5.05012900  |
|   |             |            |             | O  | 7.68782200  | 7.56808700  | 7.11167300  |
|   |             |            |             | C  | -4.34281700 | 9.22839000  | 6.55468900  |
|   |             |            |             | C  | -5.03852600 | 7.99544900  | 7.15891800  |
|   |             |            |             | C  | -4.17630300 | 6.74142600  | 7.20800600  |
|   |             |            |             | O  | -4.02162300 | 6.10257300  | 8.23870400  |
|   |             |            |             | O  | -3.63363400 | 6.42466600  | 6.03731700  |
|   |             |            |             | Fe | 3.63582400  | 5.03287600  | 2.22303900  |
|   |             |            |             | Fe | 0.01547200  | 5.87671800  | 3.04137400  |
|   |             |            |             | O  | 0.25880400  | 5.32986700  | 4.96273200  |
|   |             |            |             | O  | -1.93502900 | 4.53555100  | 6.14815400  |

Int B'

|   |             |             |             |   |             |             |             |
|---|-------------|-------------|-------------|---|-------------|-------------|-------------|
| O | -1.98513200 | 4.02284600  | 8.67616100  | H | -0.54596800 | 4.95148000  | 5.43852000  |
| O | 6.42565900  | 1.98470000  | 6.06188400  | H | 0.51892300  | 6.18551800  | 5.43410900  |
| O | 9.58329900  | 5.74553400  | 0.60021100  | H | -2.28894800 | 3.59999600  | 5.89212400  |
| O | 8.10866400  | 7.23931200  | 2.63337200  | H | -1.77450300 | 4.42089300  | 7.14499300  |
| H | 0.93753200  | 1.03467800  | -0.36035900 | H | -2.79261400 | 4.55414800  | 8.77941300  |
| H | -0.76432000 | 1.15891400  | -0.83340200 | H | -2.28073900 | 3.10413100  | 8.43304200  |
| H | 0.63248100  | 3.91375100  | 0.54077400  | H | 5.63499700  | 1.95224400  | 5.49892600  |
| H | -1.34116400 | 2.79207700  | 4.09135100  | H | 7.04495000  | 2.52967400  | 5.53579200  |
| H | -3.65539600 | -1.40246500 | 4.47982300  | H | 9.22066600  | 6.58191100  | 0.94385000  |
| H | -3.49091400 | 0.31576600  | 4.07724800  | H | 9.68386000  | 5.24428200  | 1.44383700  |
| H | -2.33875000 | -0.75083500 | 6.70975100  | H | 7.70317000  | 7.68179100  | 3.40446500  |
| H | -4.02927800 | -0.35092200 | 6.58053900  | H | 8.48984100  | 6.41459800  | 3.02227100  |
| H | 7.59834200  | 3.80631400  | -2.57286700 | O | 4.15106400  | 5.09535900  | 3.96542500  |
| H | 5.92019100  | 3.37744200  | -2.87603400 | H | 4.22467800  | 4.16070300  | 4.27112400  |
| H | 4.18048100  | 3.43916800  | -0.54371100 | H | -2.98434800 | 5.61642900  | 6.12478800  |
| H | 6.82687600  | 5.78613900  | 1.74958200  | H | -2.07913400 | -0.71727800 | 4.26022700  |
| H | 3.36785800  | -0.49651300 | 0.82343300  | H | -0.26620000 | -0.00681400 | 0.37574100  |
| H | 3.33445600  | 1.25599200  | 0.53989000  | H | 4.82332400  | 0.44603500  | 1.00300900  |
| H | 3.95013200  | 0.04909800  | 3.30426100  | H | 6.99000000  | 2.23665300  | -2.11746100 |
| H | 2.33300400  | 0.52665400  | 2.78218600  | H | 9.55110500  | 0.50982400  | 3.20287000  |
| H | -4.23017600 | 8.79168600  | -0.52096700 | H | 6.99521100  | 10.85164700 | 5.07142400  |
| H | -2.51996100 | 9.20167000  | -0.69763400 | H | 4.25203000  | 11.52439800 | 1.80645800  |
| H | -0.94993000 | 7.19160500  | 0.43698400  | H | -0.68921400 | 10.71776100 | 3.55305800  |
| H | -3.29291300 | 6.43932200  | 3.84470900  | H | -3.49510800 | 9.99478200  | 0.51987300  |
| H | 0.78160500  | 11.66017800 | 3.40486500  | H | -4.92745800 | 10.09566000 | 6.72903400  |
| H | 0.57820900  | 10.15512600 | 2.48051300  | O | 1.06988200  | 6.17489700  | 1.56489700  |
| H | 0.78102200  | 10.30253700 | 5.56063300  | O | 2.10226500  | 5.37725100  | 1.10613000  |
| H | 2.09790500  | 9.86422400  | 4.49546300  | C | 0.39082500  | 6.48502200  | 9.34770500  |
| H | 8.22258500  | 1.08940000  | 4.23558300  | N | 1.32065700  | 7.55005100  | 8.97944100  |
| H | 8.21779700  | 1.41449600  | 2.49386300  | C | 2.73266500  | 7.18031600  | 9.06804400  |
| H | 10.30553600 | 2.44940300  | 4.50449400  | C | 3.23295300  | 6.14017600  | 8.04626500  |
| H | 10.38595800 | 2.74049500  | 2.77000200  | C | 4.75597000  | 5.94215100  | 8.08006600  |
| H | 3.09034900  | 10.88300600 | 0.65098700  | C | 5.23231700  | 5.12204000  | 6.88024200  |
| H | 4.82034400  | 10.85163900 | 0.29341100  | N | 6.72003800  | 5.16878500  | 6.72173300  |
| H | 2.83288200  | 7.99276700  | 0.59306500  | H | 0.53774300  | 6.22045000  | 10.40277600 |
| H | 5.32937800  | 7.23723100  | 3.88525300  | H | 0.46805500  | 5.55387200  | 8.76505200  |
| H | 8.61547000  | 11.51925600 | 5.09297500  | H | 1.12462200  | 7.84762700  | 8.02445400  |
| H | 8.23074300  | 10.13481200 | 4.05415000  | H | 3.32637300  | 8.09714700  | 8.94236800  |
| H | 8.22164400  | 10.07655400 | 7.13891200  | H | 2.92826000  | 6.82658500  | 10.09125500 |
| H | 9.45207400  | 9.36469800  | 6.11925600  | H | 2.72760800  | 5.17869200  | 8.20073000  |
| H | -3.36431700 | 9.38799200  | 7.01859500  | H | 5.06083100  | 5.46706100  | 9.02408100  |
| H | -4.17911200 | 9.11050900  | 5.48008400  | H | 5.25316300  | 6.91978800  | 8.04800100  |
| H | -5.35223700 | 8.19342200  | 8.18649300  | H | 4.80024800  | 5.51942800  | 5.96050100  |
| H | -5.94310400 | 7.75998100  | 6.58207800  | H | 4.95237000  | 4.06708700  | 6.94530200  |

|              |             |             |             |    |             |             |             |
|--------------|-------------|-------------|-------------|----|-------------|-------------|-------------|
| H            | 7.16512800  | 4.54671100  | 7.39628200  | C  | 9.69467200  | 2.57916800  | 3.41871900  |
| H            | 7.03895000  | 4.82832500  | 5.78696600  | C  | 8.97228400  | 3.88162600  | 3.76744800  |
| H            | -0.63779700 | 6.84519900  | 9.24347400  | O  | 9.29369000  | 4.90302200  | 3.09312700  |
| H            | 2.94288800  | 6.48436200  | 7.04539100  | O  | 8.15825000  | 3.85750600  | 4.73184900  |
| H            | 7.10628200  | 6.18313300  | 6.86130800  | C  | 4.05793500  | 10.72610400 | 1.08084500  |
| H            | -4.54091100 | 8.11195500  | 2.41777600  | C  | 4.21416500  | 9.38147900  | 1.72111700  |
| H            | 5.59778900  | 9.63851000  | 3.32594000  | N  | 5.07587600  | 9.11892900  | 2.77954400  |
| H            | 8.15293300  | 4.92715800  | -0.10784600 | C  | 3.64762500  | 8.16734700  | 1.42651500  |
| H            | -1.32079800 | 0.81191400  | 2.59902000  | C  | 5.01255700  | 7.80153200  | 3.07870600  |
| <b>Int C</b> |             |             |             | N  | 4.15872800  | 7.19852300  | 2.26727300  |
| C            | -0.11698500 | 0.99112600  | -0.00014900 | C  | 8.01612800  | 10.58506700 | 5.01126400  |
| C            | -0.33698800 | 1.98967800  | 1.09684700  | C  | 8.38921100  | 9.73114900  | 6.21591200  |
| N            | -1.02660200 | 1.69779100  | 2.26700200  | C  | 7.72546500  | 8.34714900  | 6.21902600  |
| C            | 0.03980000  | 3.29792400  | 1.23780700  | O  | 7.08365800  | 7.98678600  | 5.19612600  |
| C            | -1.03896100 | 2.79915800  | 3.05695700  | O  | 7.90019300  | 7.66381500  | 7.27348600  |
| N            | -0.40167100 | 3.79049000  | 2.45374800  | C  | -4.35862400 | 9.22912300  | 6.55006300  |
| C            | -3.07782800 | -0.50157500 | 4.64513600  | C  | -5.18297700 | 8.01847000  | 7.02916100  |
| C            | -3.08367800 | -0.16705500 | 6.13894100  | C  | -4.40073800 | 6.71764600  | 7.10480800  |
| C            | -2.86517000 | 1.31415800  | 6.50270100  | O  | -4.31999200 | 6.06758400  | 8.13794700  |
| O            | -2.78945800 | 2.14276400  | 5.52902500  | O  | -3.83316800 | 6.37908700  | 5.95430500  |
| O            | -2.81745300 | 1.58027400  | 7.72188100  | Fe | 3.82749800  | 5.06788000  | 2.43066000  |
| C            | 6.70671100  | 3.27727000  | -2.17077900 | Fe | 0.13313100  | 5.83701400  | 3.04331100  |
| C            | 6.31190300  | 3.91283400  | -0.87486400 | O  | -0.07143500 | 5.43252100  | 5.00113800  |
| N            | 7.14285500  | 4.72728200  | -0.11892800 | O  | -2.17214900 | 4.50045600  | 6.17842700  |
| C            | 5.09658100  | 3.95808900  | -0.24004800 | O  | -2.27675800 | 4.04118500  | 8.72291100  |
| C            | 6.43420300  | 5.22535100  | 0.91096800  | O  | 6.61422000  | 1.96990100  | 6.09146600  |
| N            | 5.18185400  | 4.78031700  | 0.86506900  | O  | 9.58330500  | 5.77349300  | 0.55297200  |
| C            | 3.73563500  | 0.46702900  | 1.14584500  | O  | 8.17369300  | 7.28453200  | 2.68304000  |
| C            | 3.41074300  | 0.74568600  | 2.61668900  | H  | 0.91279100  | 1.03428000  | -0.36385700 |
| C            | 3.81596200  | 2.15237500  | 3.05202200  | H  | -0.78374100 | 1.16249200  | -0.85392200 |
| O            | 3.42665100  | 3.09383800  | 2.25491400  | H  | 0.62124000  | 3.92746800  | 0.58370400  |
| O            | 4.45266000  | 2.31271000  | 4.10857400  | H  | -1.51000300 | 2.79618600  | 4.03077200  |
| C            | -3.34290400 | 9.06301800  | 0.02592100  | H  | -3.67388400 | -1.40077300 | 4.44416100  |
| C            | -2.87457400 | 8.04556400  | 1.00367900  | H  | -3.51751000 | 0.32672500  | 4.08229800  |
| N            | -3.58698300 | 7.69310200  | 2.14101400  | H  | -2.34268900 | -0.75453900 | 6.69178900  |
| C            | -1.72033500 | 7.31660300  | 1.07355900  | H  | -4.05231800 | -0.43807900 | 6.57718400  |
| C            | -2.85663300 | 6.79516700  | 2.84839400  | H  | 7.57240300  | 3.79715800  | -2.59570300 |
| N            | -1.72214000 | 6.54878800  | 2.21884600  | H  | 5.89128700  | 3.38969500  | -2.89395200 |
| C            | 0.35514700  | 10.64327300 | 3.42699000  | H  | 4.17580500  | 3.45839800  | -0.49778800 |
| C            | 0.97403400  | 9.86132300  | 4.59392800  | H  | 6.85660300  | 5.90099500  | 1.64902800  |
| C            | 0.59509300  | 8.38087200  | 4.66165300  | H  | 3.33463800  | -0.50463800 | 0.83345000  |
| O            | 0.38274400  | 7.80074600  | 3.53499100  | H  | 3.29745800  | 1.24230600  | 0.51279600  |
| O            | 0.54225200  | 7.81702500  | 5.77887100  | H  | 3.89879200  | 0.02650100  | 3.27961500  |
| C            | 8.83486700  | 1.30890600  | 3.35409500  | H  | 2.32780700  | 0.66238500  | 2.77595700  |



|   |             |             |             |                  |             |             |             |
|---|-------------|-------------|-------------|------------------|-------------|-------------|-------------|
| H | -4.26802400 | 8.76116200  | -0.48176900 | H                | 6.98174900  | 10.85914600 | 5.02421600  |
| H | -2.57987700 | 9.21281500  | -0.74127300 | H                | 4.23036700  | 11.53006700 | 1.76576900  |
| H | -0.87337600 | 7.31477400  | 0.40454000  | H                | -0.70681500 | 10.72934400 | 3.52654900  |
| H | -3.16988800 | 6.40302600  | 3.80508700  | H                | -3.52136300 | 10.00486100 | 0.50174000  |
| H | 0.76896500  | 11.65709300 | 3.38376800  | H                | -4.93703400 | 10.11434100 | 6.71459700  |
| H | 0.56926800  | 10.13875700 | 2.48195000  | O                | 1.93684500  | 5.47895400  | 2.54558500  |
| H | 0.73038600  | 10.31250700 | 5.56029100  | O                | 1.20918400  | 5.98385900  | 1.38669700  |
| H | 2.06876400  | 9.88316800  | 4.50705400  | C                | 0.57783000  | 6.04394200  | 9.12800000  |
| H | 8.29738500  | 1.12780000  | 4.28759700  | N                | 1.43515400  | 7.20574700  | 8.90997900  |
| H | 8.10548700  | 1.35612000  | 2.53833200  | C                | 2.86637600  | 6.94091300  | 9.03553100  |
| H | 10.46171900 | 2.44081000  | 4.19456300  | C                | 3.49602900  | 6.00947100  | 7.98101000  |
| H | 10.23147800 | 2.72258300  | 2.47538400  | C                | 5.02168800  | 5.88511300  | 8.11815600  |
| H | 3.04673500  | 10.83629600 | 0.67960700  | C                | 5.61921700  | 5.13067600  | 6.93154200  |
| H | 4.75899900  | 10.86014800 | 0.24656300  | N                | 7.11340600  | 5.20048600  | 6.89810200  |
| H | 2.88311800  | 7.92545100  | 0.70415200  | H                | 0.72681100  | 5.66495600  | 10.14698300 |
| H | 5.58370600  | 7.34345600  | 3.87186100  | H                | 0.73509500  | 5.19792400  | 8.43868200  |
| H | 8.59564700  | 11.51709800 | 4.99120600  | H                | 1.24311600  | 7.59244600  | 7.98684500  |
| H | 8.22141300  | 10.04503800 | 4.08255100  | H                | 3.39005500  | 7.90699700  | 8.99868800  |
| H | 8.13819900  | 10.22914700 | 7.15962800  | H                | 3.04715700  | 6.53346600  | 10.04160600 |
| H | 9.47403000  | 9.56688600  | 6.24744100  | H                | 3.03763100  | 5.01403100  | 8.03223400  |
| H | -3.42788400 | 9.32086100  | 7.11788500  | H                | 5.27675000  | 5.38625500  | 9.06515700  |
| H | -4.09833500 | 9.14933000  | 5.49154700  | H                | 5.47280000  | 6.88461500  | 8.15874500  |
| H | -5.58358400 | 8.20023600  | 8.02922900  | H                | 5.27954100  | 5.57093200  | 5.99457400  |
| H | -6.03632100 | 7.86569600  | 6.35508400  | H                | 5.34942100  | 4.07112500  | 6.92003200  |
| H | -0.85768400 | 5.00230400  | 5.46641500  | H                | 7.51735800  | 4.59914500  | 7.61561100  |
| H | 0.17246400  | 6.29125900  | 5.47865300  | H                | 7.47878300  | 4.85531300  | 5.97931100  |
| H | -2.48166400 | 3.54264900  | 5.91377500  | H                | -0.47215900 | 6.33788500  | 9.04329500  |
| H | -2.02910700 | 4.40977700  | 7.17736800  | H                | 3.25686600  | 6.40526600  | 6.98489700  |
| H | -3.10664000 | 4.54558800  | 8.77092700  | H                | 7.45125700  | 6.23084600  | 7.04662000  |
| H | -2.52565300 | 3.11147900  | 8.47844000  | H                | -4.49144600 | 8.04614900  | 2.41461000  |
| H | 5.85074200  | 1.88362200  | 5.49857300  | H                | 5.69731100  | 9.75862700  | 3.25414000  |
| H | 7.22230400  | 2.54169600  | 5.58115200  | H                | 8.14963000  | 4.96875500  | -0.18754700 |
| H | 9.24763500  | 6.61827000  | 0.90038900  | H                | -1.45124100 | 0.81823300  | 2.52355900  |
| H | 9.67588800  | 5.26585900  | 1.39537400  | TS <sub>CD</sub> |             |             |             |
| H | 7.81920700  | 7.69440900  | 3.49575700  | C                | -0.11696900 | 0.99111600  | -0.00014100 |
| H | 8.55432600  | 6.43726200  | 3.02172000  | C                | -0.28915200 | 2.00419500  | 1.09044500  |
| O | 4.63789800  | 4.99725200  | 4.03075400  | N                | -1.04712900 | 1.79726700  | 2.23584700  |
| H | 4.72692100  | 4.04619500  | 4.28725000  | C                | 0.21060400  | 3.27002600  | 1.23443600  |
| H | -3.20620600 | 5.55222100  | 6.07710300  | C                | -0.97780600 | 2.90529800  | 3.01326200  |
| H | -2.10360000 | -0.70371700 | 4.25124200  | N                | -0.22402300 | 3.82191100  | 2.42539600  |
| H | -0.30051100 | 0.00065800  | 0.36106300  | C                | -3.07782500 | -0.50157200 | 4.64513200  |
| H | 4.79102200  | 0.45036600  | 0.97418500  | C                | -3.07868200 | -0.15595800 | 6.13409600  |
| H | 6.95072300  | 2.23552300  | -2.15423700 | C                | -2.85855200 | 1.32923900  | 6.46287300  |
| H | 9.52470900  | 0.51316300  | 3.16129900  | O                | -2.80724000 | 2.12980400  | 5.46221000  |

|   |             |             |             |    |             |             |             |
|---|-------------|-------------|-------------|----|-------------|-------------|-------------|
| O | -2.78752600 | 1.63019800  | 7.67170000  | Fe | 3.67294900  | 5.08958100  | 2.41597600  |
| C | 6.70670600  | 3.27725700  | -2.17076800 | Fe | 0.49361000  | 5.80371600  | 3.06684000  |
| C | 6.18684600  | 3.92074100  | -0.92445900 | O  | -0.36635000 | 5.59174700  | 4.84881800  |
| N | 6.95661000  | 4.78484500  | -0.16427800 | O  | -2.30356100 | 4.49389200  | 6.04331600  |
| C | 4.93457100  | 3.96652100  | -0.35849700 | O  | -2.25141800 | 4.11622000  | 8.60388600  |
| C | 6.18600500  | 5.30348000  | 0.80560700  | O  | 6.64265700  | 2.49622500  | 6.19652800  |
| N | 4.94238400  | 4.83558800  | 0.71554300  | O  | 9.45958100  | 5.80721600  | 0.27550400  |
| C | 3.73565000  | 0.46704600  | 1.14584100  | O  | 8.14749300  | 7.25252700  | 2.41527000  |
| C | 3.41888900  | 0.74358700  | 2.61995700  | H  | 0.90290200  | 1.02470800  | -0.39094600 |
| C | 3.83959000  | 2.15585800  | 3.01585200  | H  | -0.80376200 | 1.16776700  | -0.83742000 |
| O | 3.36198500  | 3.07817400  | 2.25165900  | H  | 0.89348500  | 3.80709700  | 0.59797500  |
| O | 4.59381700  | 2.33239800  | 3.99308800  | H  | -1.46693300 | 2.95757000  | 3.97476400  |
| C | -3.34292600 | 9.06303100  | 0.02594300  | H  | -3.66999100 | -1.40553000 | 4.45315000  |
| C | -2.69035100 | 8.08659100  | 0.95456200  | H  | -3.52418500 | 0.31970300  | 4.07803900  |
| N | -3.27940700 | 7.65861000  | 2.13578200  | H  | -2.33470400 | -0.73520800 | 6.69137200  |
| C | -1.47710000 | 7.44471600  | 0.92631000  | H  | -4.04582900 | -0.41933500 | 6.58036800  |
| C | -2.42981900 | 6.80769000  | 2.76232800  | H  | 7.61266300  | 3.79972600  | -2.49701300 |
| N | -1.32695800 | 6.65532700  | 2.05013600  | H  | 5.97658200  | 3.39947100  | -2.98020200 |
| C | 0.35514200  | 10.64327800 | 3.42699000  | H  | 4.03982000  | 3.43623200  | -0.64665300 |
| C | 0.99697200  | 9.88754600  | 4.59538000  | H  | 6.57373600  | 5.99124200  | 1.54713400  |
| C | 0.62446300  | 8.41039000  | 4.63332200  | H  | 3.33410200  | -0.50411400 | 0.83201600  |
| O | 0.71886600  | 7.78314500  | 3.51502600  | H  | 3.29675500  | 1.24533200  | 0.51774700  |
| O | 0.26210700  | 7.89809000  | 5.71920600  | H  | 3.91857600  | 0.02913600  | 3.27930400  |
| C | 8.83487100  | 1.30892000  | 3.35408400  | H  | 2.33762500  | 0.66192700  | 2.78725500  |
| C | 9.66675500  | 2.59992400  | 3.38109100  | H  | -4.30102600 | 8.68829200  | -0.35484500 |
| C | 8.88279000  | 3.90924300  | 3.52660400  | H  | -2.69315700 | 9.23978200  | -0.83444500 |
| O | 9.24504800  | 4.86062100  | 2.76996600  | H  | -0.70036800 | 7.51138300  | 0.17896500  |
| O | 7.97942600  | 3.97609600  | 4.39948600  | H  | -2.63254900 | 6.37124000  | 3.72784600  |
| C | 4.05792800  | 10.72608900 | 1.08083500  | H  | 0.75896200  | 11.65997800 | 3.36038300  |
| C | 4.20177500  | 9.38661200  | 1.71966600  | H  | 0.57096800  | 10.12803000 | 2.48778200  |
| N | 5.14138100  | 9.08997000  | 2.69716400  | H  | 0.73359800  | 10.33080200 | 5.55920200  |
| C | 3.55540200  | 8.20086600  | 1.48586700  | H  | 2.08886500  | 9.93407500  | 4.49714600  |
| C | 5.04531500  | 7.77743500  | 3.00399500  | H  | 8.31438000  | 1.13630200  | 4.29916700  |
| N | 4.09348600  | 7.21416800  | 2.28300200  | H  | 8.08902800  | 1.32938900  | 2.55226800  |
| C | 8.01612000  | 10.58507100 | 5.01127000  | H  | 10.36568700 | 2.55243500  | 4.22839800  |
| C | 8.35090000  | 9.63220400  | 6.15892200  | H  | 10.27938700 | 2.67146400  | 2.47668900  |
| C | 7.62442400  | 8.28038700  | 6.06068700  | H  | 3.04968800  | 10.84156800 | 0.67362100  |
| O | 7.11478600  | 7.97950200  | 4.94258900  | H  | 4.76393300  | 10.85750400 | 0.24976400  |
| O | 7.60042700  | 7.56743600  | 7.10348200  | H  | 2.73499500  | 7.99408600  | 0.81682100  |
| C | -4.35863400 | 9.22913200  | 6.55004600  | H  | 5.68121700  | 7.29838700  | 3.72924300  |
| C | -5.23019200 | 8.02719200  | 6.96370500  | H  | 8.60064900  | 11.51150600 | 5.07985900  |
| C | -4.47644400 | 6.71203200  | 7.00487700  | H  | 8.24037000  | 10.11679000 | 4.04908200  |
| O | -4.33957800 | 6.07152200  | 8.03852200  | H  | 8.11795300  | 10.07532800 | 7.13347800  |
| O | -3.99059200 | 6.35380500  | 5.82267100  | H  | 9.42861500  | 9.42181800  | 6.17467400  |

|   |             |             |             |                          |             |             |             |
|---|-------------|-------------|-------------|--------------------------|-------------|-------------|-------------|
| H | -3.45250800 | 9.29011200  | 7.15975200  | H                        | 4.70758500  | 5.40161100  | 8.58173300  |
| H | -4.05879300 | 9.17114200  | 5.50070500  | H                        | 5.02238900  | 7.06323100  | 8.08467500  |
| H | -5.64583200 | 8.18628400  | 7.96148000  | H                        | 4.66038400  | 6.49025200  | 5.71244600  |
| H | -6.06865300 | 7.92523400  | 6.26281800  | H                        | 4.28121100  | 4.82606200  | 6.11830700  |
| H | -1.09910300 | 5.06027100  | 5.31553900  | H                        | 6.49540700  | 4.41834900  | 6.69590900  |
| H | -0.15078600 | 6.43826700  | 5.36723600  | H                        | 6.57753300  | 5.27032600  | 5.31841100  |
| H | -2.57233600 | 3.50435500  | 5.80664600  | H                        | -0.88442400 | 6.84408000  | 9.31176500  |
| H | -2.11623900 | 4.44045400  | 7.03751600  | H                        | 2.65732500  | 6.96981600  | 6.92983400  |
| H | -3.08888400 | 4.60469400  | 8.67880000  | H                        | 6.90243900  | 6.15366500  | 6.71131500  |
| H | -2.49122300 | 3.17588400  | 8.39706300  | H                        | -4.18280500 | 7.93184300  | 2.49272500  |
| H | 5.87582800  | 2.25594500  | 5.65161500  | H                        | 5.83111600  | 9.69695000  | 3.11751500  |
| H | 7.26875700  | 2.86277200  | 5.52645500  | H                        | 7.96435200  | 5.04727100  | -0.22419500 |
| H | 9.14076900  | 6.63273400  | 0.68540600  | H                        | -1.55157300 | 0.96179000  | 2.49673300  |
| H | 9.61300100  | 5.26762000  | 1.08773000  | Int D <sub>diamond</sub> |             |             |             |
| H | 7.89728300  | 7.69092900  | 3.25052800  | C                        | -0.11696700 | 0.99112600  | -0.00014400 |
| H | 8.49418800  | 6.37567300  | 2.72435500  | C                        | -0.24885000 | 2.01872700  | 1.07230400  |
| O | 4.99303900  | 4.93517100  | 3.62182700  | N                        | -0.87841400 | 1.81987200  | 2.29310300  |
| H | 5.06572200  | 3.97426600  | 3.86565500  | C                        | 0.21971100  | 3.30140900  | 1.12630900  |
| H | -3.37286400 | 5.52511200  | 5.93158700  | C                        | -0.76254000 | 2.95290900  | 3.02729600  |
| H | -2.10360500 | -0.70372000 | 4.25124700  | N                        | -0.10194300 | 3.86973300  | 2.33939400  |
| H | -0.30052600 | 0.00066400  | 0.36105600  | C                        | -3.07782800 | -0.50157100 | 4.64513500  |
| H | 4.79101200  | 0.45035100  | 0.97418900  | C                        | -3.63684600 | 0.02603800  | 5.96113700  |
| H | 6.95072600  | 2.23553400  | -2.15424400 | C                        | -3.35121000 | 1.51551900  | 6.19282600  |
| H | 9.52470800  | 0.51315600  | 3.16130800  | O                        | -3.02586100 | 2.18266300  | 5.14677200  |
| H | 6.98175700  | 10.85914300 | 5.02421000  | O                        | -3.47927200 | 1.94585100  | 7.35736400  |
| H | 4.23037500  | 11.53007700 | 1.76577900  | C                        | 6.70669400  | 3.27727000  | -2.17078000 |
| H | -0.70681000 | 10.72934100 | 3.52654700  | C                        | 6.11513000  | 3.91074700  | -0.93897400 |
| H | -3.52134200 | 10.00485200 | 0.50171900  | N                        | 6.85735200  | 4.74466900  | -0.11810000 |
| H | -4.93702400 | 10.11433000 | 6.71461000  | C                        | 4.83246200  | 3.97732900  | -0.43546100 |
| O | 1.86758400  | 5.60910100  | 1.75847600  | C                        | 6.04421000  | 5.26248000  | 0.81935000  |
| O | 2.19895500  | 5.29674200  | 3.58619900  | N                        | 4.79771900  | 4.82585900  | 0.65859600  |
| C | 0.15872700  | 6.51796000  | 9.36636500  | C                        | 3.73564200  | 0.46705300  | 1.14584500  |
| N | 1.03835100  | 7.64017400  | 9.04096500  | C                        | 3.37884300  | 0.81069400  | 2.59671400  |
| C | 2.46412600  | 7.30642900  | 9.03652000  | C                        | 3.72321000  | 2.25409400  | 2.93854700  |
| C | 2.93945000  | 6.44531900  | 7.85289000  | O                        | 3.16408300  | 3.14277200  | 2.19648400  |
| C | 4.45110800  | 6.16135700  | 7.83072200  | O                        | 4.51427400  | 2.49146700  | 3.88059300  |
| C | 4.85680600  | 5.69818700  | 6.43356300  | C                        | -3.34291500 | 9.06301900  | 0.02593000  |
| N | 6.30333200  | 5.35759700  | 6.31023800  | C                        | -2.57846800 | 8.09514200  | 0.89362300  |
| H | 0.34661700  | 6.19440000  | 10.39782000 | N                        | -3.14429500 | 7.47876100  | 2.00173700  |
| H | 0.25262600  | 5.63045900  | 8.72145600  | C                        | -1.29401700 | 7.59630700  | 0.85261700  |
| H | 0.78653100  | 7.99165600  | 8.11776900  | C                        | -2.22136200 | 6.66713000  | 2.56820600  |
| H | 3.03615000  | 8.24571100  | 9.03405700  | N                        | -1.08379900 | 6.71057200  | 1.89786200  |
| H | 2.69871400  | 6.80822200  | 9.98792400  | C                        | 0.35514800  | 10.64327600 | 3.42698800  |
| H | 2.39161700  | 5.49509900  | 7.83519000  | C                        | 1.01135400  | 9.88761900  | 4.58761300  |

|    |             |             |             |   |             |             |             |
|----|-------------|-------------|-------------|---|-------------|-------------|-------------|
| C  | 0.72226400  | 8.39039000  | 4.55318900  | H | 3.34675400  | -0.52273100 | 0.87891600  |
| O  | 0.93005700  | 7.81563800  | 3.42796400  | H | 3.29259500  | 1.20197500  | 0.46890000  |
| O  | 0.30602600  | 7.82769100  | 5.59739300  | H | 3.89494300  | 0.15456600  | 3.30205900  |
| C  | 8.83487000  | 1.30891700  | 3.35409300  | H | 2.29904500  | 0.68891100  | 2.74375500  |
| C  | 9.65269900  | 2.60580900  | 3.37714800  | H | -4.31122400 | 8.64545100  | -0.27400600 |
| C  | 8.86496700  | 3.88678800  | 3.66205900  | H | -2.77464100 | 9.25823700  | -0.88728900 |
| O  | 9.18162600  | 4.91043700  | 2.99347200  | H | -0.50975800 | 7.81934400  | 0.14461400  |
| O  | 7.99330500  | 3.84364800  | 4.57597900  | H | -2.40861900 | 6.10322900  | 3.46349700  |
| C  | 4.05792600  | 10.72608900 | 1.08082700  | H | 0.75138200  | 11.66365300 | 3.36136000  |
| C  | 4.14664300  | 9.38402000  | 1.72382400  | H | 0.57242100  | 10.13353300 | 2.48515400  |
| N  | 4.98514200  | 9.07410000  | 2.78736200  | H | 0.69744000  | 10.27887800 | 5.55870700  |
| C  | 3.51716400  | 8.20743400  | 1.41819500  | H | 2.10042600  | 10.00130700 | 4.51933800  |
| C  | 4.85271700  | 7.76298300  | 3.07652100  | H | 8.31679300  | 1.13455300  | 4.29981400  |
| N  | 3.97137000  | 7.21515600  | 2.25792200  | H | 8.08512300  | 1.32485800  | 2.55555000  |
| C  | 8.01612700  | 10.58506300 | 5.01127500  | H | 10.41703400 | 2.53021700  | 4.16408600  |
| C  | 8.34655500  | 9.64487200  | 6.16470500  | H | 10.19252700 | 2.73648000  | 2.43380700  |
| C  | 7.58312400  | 8.31454500  | 6.10590700  | H | 3.06614200  | 10.86620500 | 0.64224200  |
| O  | 6.91942200  | 8.05522200  | 5.06326700  | H | 4.79193100  | 10.83610300 | 0.27137400  |
| O  | 7.69476000  | 7.56961800  | 7.12401900  | H | 2.76023700  | 8.00627000  | 0.67729000  |
| C  | -4.35863200 | 9.22912300  | 6.55006400  | H | 5.41673700  | 7.27271000  | 3.85184300  |
| C  | -5.37005500 | 8.15894900  | 6.07771200  | H | 8.60475200  | 11.50940700 | 5.06795100  |
| C  | -4.77584600 | 6.77431500  | 6.17663800  | H | 8.23308600  | 10.10779200 | 4.05122100  |
| O  | -4.75724700 | 6.16976200  | 7.24092400  | H | 8.13939100  | 10.10925000 | 7.13584300  |
| O  | -4.24328500 | 6.33934600  | 5.04353600  | H | 9.41754200  | 9.40467400  | 6.17357400  |
| Fe | 3.41899400  | 5.18055400  | 2.36090800  | H | -3.89596600 | 8.93132200  | 7.49419000  |
| Fe | 0.76595000  | 5.80347200  | 2.90528500  | H | -3.57386400 | 9.41416800  | 5.81294800  |
| O  | -0.29973200 | 5.60209200  | 4.59322100  | H | -6.24610500 | 8.18402300  | 6.73221500  |
| O  | -2.50595600 | 4.58507400  | 5.49259200  | H | -5.69583600 | 8.36793600  | 5.05363200  |
| O  | -2.69401900 | 4.41328100  | 8.07467000  | H | -1.13260500 | 5.13438600  | 4.90397100  |
| O  | 6.49728800  | 2.05960900  | 6.05349100  | H | -0.09126500 | 6.42257200  | 5.16172400  |
| O  | 9.32025800  | 5.82118000  | 0.45358400  | H | -2.77268100 | 3.57429400  | 5.33536400  |
| O  | 7.94698200  | 7.24031200  | 2.55540800  | H | -2.41783200 | 4.61363300  | 6.50330100  |
| H  | 0.89235600  | 1.00894600  | -0.42034900 | H | -3.51333500 | 4.93814000  | 8.05008400  |
| H  | -0.81953500 | 1.16642900  | -0.82494500 | H | -2.98988500 | 3.47504300  | 7.93255100  |
| H  | 0.80879200  | 3.84375200  | 0.40545300  | H | 5.75125400  | 1.96014100  | 5.44148000  |
| H  | -1.16675700 | 3.03751500  | 4.02246700  | H | 7.13838000  | 2.56457500  | 5.51198400  |
| H  | -3.32441900 | -1.55969100 | 4.49468800  | H | 8.95765500  | 6.63690200  | 0.84617000  |
| H  | -3.48163700 | 0.07151800  | 3.80575100  | H | 9.49823400  | 5.30522300  | 1.27434800  |
| H  | -3.24270500 | -0.52755600 | 6.81954600  | H | 7.66371100  | 7.69955500  | 3.36857300  |
| H  | -4.72703100 | -0.10494700 | 5.99240500  | H | 8.32736600  | 6.39572900  | 2.90064300  |
| H  | 7.62745400  | 3.80715800  | -2.43769600 | O | 4.77372500  | 4.98762000  | 3.44289500  |
| H  | 6.02042100  | 3.41125300  | -3.01556300 | H | 4.79865900  | 4.01347100  | 3.74192200  |
| H  | 3.94185800  | 3.47802200  | -0.78633500 | H | -3.62127000 | 5.52222700  | 5.23582600  |
| H  | 6.40425300  | 5.93216400  | 1.59006400  | H | -1.98559900 | -0.40967500 | 4.62383600  |

|                        |             |             |             |   |             |             |             |
|------------------------|-------------|-------------|-------------|---|-------------|-------------|-------------|
| H                      | -0.30052800 | 0.00065500  | 0.36106000  | C | -3.07782900 | -0.50157200 | 4.64513500  |
| H                      | 4.79102100  | 0.45034600  | 0.97418600  | C | -3.72339800 | -0.11454700 | 5.97471600  |
| H                      | 6.95073800  | 2.23551900  | -2.15423700 | C | -3.43514400 | 1.33112400  | 6.41322500  |
| H                      | 9.52470900  | 0.51315400  | 3.16130100  | O | -3.12324000 | 2.14475100  | 5.47323800  |
| H                      | 6.98175000  | 10.85914800 | 5.02420800  | O | -3.55203300 | 1.59366600  | 7.62769700  |
| H                      | 4.23037600  | 11.53007700 | 1.76578500  | C | 6.70670000  | 3.27726300  | -2.17077900 |
| H                      | -0.70681700 | 10.72934300 | 3.52654800  | C | 6.15510000  | 3.88516700  | -0.90865500 |
| H                      | -3.52135100 | 10.00486200 | 0.50172900  | N | 6.89818900  | 4.71408300  | -0.08130300 |
| H                      | -4.93702800 | 10.11434000 | 6.71459700  | C | 4.88591500  | 3.90703300  | -0.37718600 |
| O                      | 1.83826200  | 5.70313200  | 1.48481600  | C | 6.09300600  | 5.19890300  | 0.88112000  |
| O                      | 2.17881900  | 5.29631200  | 3.75908700  | N | 4.85398600  | 4.73341200  | 0.73382100  |
| C                      | 0.29229600  | 5.91226700  | 9.00974700  | C | 3.73563500  | 0.46705900  | 1.14584800  |
| N                      | 1.07605600  | 7.11365200  | 8.73485100  | C | 3.36090100  | 0.74832300  | 2.60228500  |
| C                      | 2.52177300  | 6.91376600  | 8.77924500  | C | 3.57601300  | 2.20152300  | 3.01231100  |
| C                      | 3.13090300  | 6.02380100  | 7.67786800  | O | 3.10072600  | 3.07988100  | 2.18645900  |
| C                      | 4.65768800  | 5.90515900  | 7.78313400  | O | 4.14978400  | 2.45499700  | 4.08673900  |
| C                      | 5.25004000  | 5.19142600  | 6.57029200  | C | -3.34292000 | 9.06301600  | 0.02593200  |
| N                      | 6.74380900  | 5.17663600  | 6.60261200  | C | -2.71463000 | 8.06840200  | 0.95259400  |
| H                      | 0.48906900  | 5.57798800  | 10.03708100 | N | -3.40827000 | 7.51975300  | 2.02099600  |
| H                      | 0.48541500  | 5.05529100  | 8.34303500  | C | -1.45982800 | 7.51456600  | 1.03922900  |
| H                      | 0.81802000  | 7.48290300  | 7.82072300  | C | -2.58145200 | 6.68942600  | 2.69901900  |
| H                      | 3.00252200  | 7.90155900  | 8.73079000  | N | -1.39040400 | 6.66368600  | 2.12634600  |
| H                      | 2.77449700  | 6.49934000  | 9.76685200  | C | 0.35516500  | 10.64329400 | 3.42698400  |
| H                      | 2.68256000  | 5.02334600  | 7.70987900  | C | 0.96241100  | 9.88409100  | 4.61635200  |
| H                      | 4.92890100  | 5.37163600  | 8.70627200  | C | 0.50633300  | 8.42995500  | 4.63367700  |
| H                      | 5.10959000  | 6.90254400  | 7.85598900  | O | 0.70670600  | 7.77522300  | 3.56273700  |
| H                      | 4.96339800  | 5.69883200  | 5.64999200  | O | -0.05387600 | 7.97312300  | 5.67305500  |
| H                      | 4.92294200  | 4.15160800  | 6.49547000  | C | 8.83486700  | 1.30891500  | 3.35408700  |
| H                      | 7.06557700  | 4.49449600  | 7.28947800  | C | 9.66119500  | 2.59315300  | 3.49008200  |
| H                      | 7.15017300  | 4.85953800  | 5.69045800  | C | 8.85269900  | 3.84291900  | 3.83947400  |
| H                      | -0.77500300 | 6.13349600  | 8.93462300  | O | 9.07896700  | 4.88616600  | 3.16453300  |
| H                      | 2.86118900  | 6.44591000  | 6.70084400  | O | 8.04661700  | 3.74610300  | 4.80856800  |
| H                      | 7.13958900  | 6.16705100  | 6.82959000  | C | 4.05792700  | 10.72609200 | 1.08083000  |
| H                      | -4.07334200 | 7.60822300  | 2.37508000  | C | 4.09356700  | 9.37069300  | 1.70350600  |
| H                      | 5.64770900  | 9.66557800  | 3.27021500  | N | 4.82842800  | 9.02706400  | 2.82941100  |
| H                      | 7.86521000  | 5.00537700  | -0.12797600 | C | 3.50227200  | 8.19995300  | 1.30405000  |
| H                      | -1.37439200 | 0.99820300  | 2.60868900  | C | 4.66781400  | 7.70733600  | 3.06400400  |
| Int D <sub>open2</sub> |             |             |             | N | 3.87199400  | 7.17622800  | 2.14857800  |
| C                      | -0.11697900 | 0.99112100  | -0.00015300 | C | 8.01612000  | 10.58505800 | 5.01126800  |
| C                      | -0.44255000 | 1.98277200  | 1.07466400  | C | 8.31996500  | 9.62796900  | 6.15466500  |
| N                      | -1.13766200 | 1.65897600  | 2.23184400  | C | 7.48558700  | 8.34019600  | 6.10601200  |
| C                      | -0.12868400 | 3.30591500  | 1.22515100  | O | 6.76346000  | 8.12671000  | 5.09296600  |
| C                      | -1.20670800 | 2.75995800  | 3.02393300  | O | 7.61275700  | 7.58328400  | 7.11431400  |
| N                      | -0.60181700 | 3.77774300  | 2.43357500  | C | -4.35863200 | 9.22912100  | 6.55004600  |

|    |             |             |             |   |             |             |             |
|----|-------------|-------------|-------------|---|-------------|-------------|-------------|
| C  | -5.03725200 | 8.08092000  | 7.31850800  | H | 8.61287600  | 11.50298800 | 5.08153600  |
| C  | -4.27112700 | 6.76963400  | 7.34443600  | H | 8.22937800  | 10.11508300 | 4.04667100  |
| O  | -4.04464100 | 6.17531900  | 8.39064300  | H | 8.15053000  | 10.09870400 | 7.13026300  |
| O  | -3.90917800 | 6.34579000  | 6.14119300  | H | 9.37650100  | 9.33117900  | 6.14836700  |
| Fe | 3.38358800  | 5.07209100  | 2.26302800  | H | -3.34054600 | 9.40274300  | 6.91039800  |
| Fe | 0.28010700  | 5.72363800  | 3.20460300  | H | -4.30564300 | 9.01908400  | 5.47877300  |
| O  | -0.88953700 | 5.83545400  | 4.75674700  | H | -5.20440400 | 8.36240200  | 8.36100400  |
| O  | -2.28295000 | 4.37224800  | 6.24064000  | H | -6.02160100 | 7.87868400  | 6.87452800  |
| O  | -2.41343500 | 3.79755200  | 8.77633800  | H | -1.27695500 | 5.11368300  | 5.36724400  |
| O  | 6.36812200  | 1.78510200  | 5.93616600  | H | -0.56699800 | 6.69129800  | 5.28617000  |
| O  | 9.30498400  | 5.79839500  | 0.62560400  | H | -2.67930000 | 3.45874200  | 5.92155500  |
| O  | 7.82732600  | 7.19320200  | 2.65779000  | H | -2.10324500 | 4.21336800  | 7.21902400  |
| H  | 0.93524800  | 1.05901000  | -0.28800900 | H | -3.09354200 | 4.48780600  | 8.86616900  |
| H  | -0.72548200 | 1.13608700  | -0.90097300 | H | -2.89044300 | 2.98224700  | 8.47978500  |
| H  | 0.45143100  | 3.93764500  | 0.57302000  | H | 5.60379600  | 1.83273000  | 5.33885300  |
| H  | -1.69955300 | 2.74216200  | 3.98698800  | H | 7.01489500  | 2.38489500  | 5.51671400  |
| H  | -3.34482000 | -1.52369200 | 4.35013200  | H | 8.92359900  | 6.61378400  | 1.00119600  |
| H  | -3.40668600 | 0.18464300  | 3.85877400  | H | 9.44257900  | 5.28258400  | 1.45559000  |
| H  | -3.40286800 | -0.77713600 | 6.78466700  | H | 7.49226700  | 7.67751000  | 3.43754000  |
| H  | -4.81468200 | -0.22297700 | 5.90639300  | H | 8.21547600  | 6.37404600  | 3.04945900  |
| H  | 7.61598100  | 3.81095000  | -2.46637200 | O | 4.09742300  | 5.10785000  | 3.91978400  |
| H  | 5.98681700  | 3.41161000  | -2.98603000 | H | 4.17205800  | 4.16440500  | 4.21733700  |
| H  | 4.00192100  | 3.38909400  | -0.71709900 | H | -3.32088100 | 5.50317500  | 6.22221800  |
| H  | 6.44785700  | 5.88391800  | 1.64534500  | H | -1.98518600 | -0.44865400 | 4.70994300  |
| H  | 3.34897300  | -0.51025700 | 0.83136200  | H | -0.30051700 | 0.00065700  | 0.36106400  |
| H  | 3.29757500  | 1.22876300  | 0.49615000  | H | 4.79102800  | 0.45034200  | 0.97418400  |
| H  | 3.91403000  | 0.11039400  | 3.29601900  | H | 6.95073300  | 2.23552500  | -2.15423800 |
| H  | 2.29217600  | 0.54204300  | 2.74675200  | H | 9.52470900  | 0.51315800  | 3.16130600  |
| H  | -4.29643100 | 8.69647200  | -0.37298000 | H | 6.98175400  | 10.85915300 | 5.02421400  |
| H  | -2.68086900 | 9.24311300  | -0.82483800 | H | 4.23037400  | 11.53007400 | 1.76578200  |
| H  | -0.60144300 | 7.68278000  | 0.40693800  | H | -0.70682600 | 10.72932700 | 3.52655100  |
| H  | -2.85531900 | 6.17966700  | 3.60783100  | H | -3.52134700 | 10.00486400 | 0.50172600  |
| H  | 0.76569800  | 11.65729800 | 3.36063400  | H | -4.93702600 | 10.11434000 | 6.71461100  |
| H  | 0.57802400  | 10.11636200 | 2.49635800  | O | 1.50508900  | 5.56563000  | 2.02729100  |
| H  | 0.69536000  | 10.34917600 | 5.56879900  | O | 1.34744500  | 4.97437500  | 4.33344600  |
| H  | 2.05551200  | 9.88433200  | 4.53194800  | C | 0.27654300  | 5.88290700  | 8.89898400  |
| H  | 8.25858900  | 1.09477800  | 4.25686100  | N | 1.13137200  | 7.03583900  | 8.63705800  |
| H  | 8.13503800  | 1.37449500  | 2.51315900  | C | 2.56306800  | 6.78544900  | 8.75665100  |
| H  | 10.39399700 | 2.45859200  | 4.29821400  | C | 3.20500200  | 5.78793100  | 7.76844500  |
| H  | 10.23021500 | 2.78444800  | 2.57472700  | C | 4.73176200  | 5.73368100  | 7.93016400  |
| H  | 3.08433300  | 10.89617300 | 0.61165800  | C | 5.41315000  | 4.90125700  | 6.84463500  |
| H  | 4.81631500  | 10.82320200 | 0.29208400  | N | 6.89772000  | 5.09158200  | 6.85957900  |
| H  | 2.82601700  | 8.03709900  | 0.47823200  | H | 0.43759500  | 5.53163700  | 9.92597700  |
| H  | 5.13841300  | 7.19245500  | 3.88473200  | H | 0.42498000  | 5.01708000  | 8.23269400  |

|                                        |             |             |             |    |             |             |             |
|----------------------------------------|-------------|-------------|-------------|----|-------------|-------------|-------------|
| H                                      | 0.91906400  | 7.41269000  | 7.71494400  | C  | -2.38614100 | 6.70274600  | 2.65620900  |
| H                                      | 3.07826300  | 7.75094000  | 8.65027100  | N  | -1.22950100 | 6.68663900  | 2.02121100  |
| H                                      | 2.75973600  | 6.44767600  | 9.78584500  | C  | 0.35514400  | 10.64327200 | 3.42699300  |
| H                                      | 2.77755500  | 4.78689000  | 7.90567100  | C  | 0.94296200  | 9.88128800  | 4.61672700  |
| H                                      | 4.98925900  | 5.34231400  | 8.92626100  | C  | 0.45220800  | 8.44632700  | 4.54769200  |
| H                                      | 5.13782900  | 6.75216400  | 7.88374000  | O  | 0.90803300  | 7.77112900  | 3.57079900  |
| H                                      | 5.08218900  | 5.21843200  | 5.85576000  | O  | -0.39086900 | 8.04336700  | 5.39834400  |
| H                                      | 5.22162100  | 3.82796800  | 6.92943900  | C  | 8.83484700  | 1.30892200  | 3.35407700  |
| H                                      | 7.31587200  | 4.61016500  | 7.65504100  | C  | 9.18329500  | 1.97730300  | 4.68844900  |
| H                                      | 7.33405800  | 4.69093500  | 5.99093400  | C  | 8.59272300  | 3.38470500  | 4.84239200  |
| H                                      | -0.77333700 | 6.17969900  | 8.82102000  | O  | 8.75993700  | 4.18426200  | 3.88717900  |
| H                                      | 2.95930400  | 6.08753000  | 6.74137000  | O  | 8.01352500  | 3.63258500  | 5.94721200  |
| H                                      | 7.15793800  | 6.15161600  | 6.92537100  | C  | 4.05792700  | 10.72608900 | 1.08084200  |
| H                                      | -4.36378700 | 7.71590000  | 2.27802500  | C  | 4.18222500  | 9.38510400  | 1.73100300  |
| H                                      | 5.45661300  | 9.59139200  | 3.38691700  | N  | 5.15104600  | 9.07010700  | 2.67763100  |
| H                                      | 7.90455300  | 4.98456800  | -0.07808900 | C  | 3.48673000  | 8.21779300  | 1.54697900  |
| H                                      | -1.51899700 | 0.75834700  | 2.48294700  | C  | 5.01880000  | 7.76771600  | 3.01759500  |
| $TS_{DE} (Fe1^{III}Fe2^{IV}_{\alpha})$ |             |             |             | N  | 4.01917400  | 7.22620100  | 2.34343800  |
| C                                      | -0.11697200 | 0.99111100  | -0.00015000 | C  | 8.01611900  | 10.58506000 | 5.01126800  |
| C                                      | -0.25138800 | 1.99957400  | 1.09832700  | C  | 8.30333100  | 9.67472800  | 6.20707200  |
| N                                      | -1.00488600 | 1.80026100  | 2.24851900  | C  | 7.42722700  | 8.41057500  | 6.18532500  |
| C                                      | 0.28600600  | 3.24899000  | 1.25087900  | O  | 7.06693300  | 7.98443600  | 5.05466800  |
| C                                      | -0.89372200 | 2.89966700  | 3.03545900  | O  | 7.13902000  | 7.88906900  | 7.30137600  |
| N                                      | -0.11912500 | 3.79821500  | 2.45013100  | C  | -4.35857500 | 9.22916200  | 6.55008300  |
| C                                      | -3.07782700 | -0.50157400 | 4.64512800  | C  | -4.71337200 | 8.18774200  | 7.62322700  |
| C                                      | -3.06021500 | -0.14298500 | 6.13178700  | C  | -4.02594000 | 6.84478800  | 7.44417100  |
| C                                      | -2.79119000 | 1.34001300  | 6.41863200  | O  | -3.51485400 | 6.23760800  | 8.37872400  |
| O                                      | -2.94967200 | 2.12913100  | 5.42270100  | O  | -4.07131300 | 6.40977600  | 6.19378700  |
| O                                      | -2.48844700 | 1.65450600  | 7.59098200  | Fe | 3.59243600  | 5.11663100  | 2.56147500  |
| C                                      | 6.70670100  | 3.27727600  | -2.17077700 | Fe | 0.71592700  | 5.74032800  | 3.09282400  |
| C                                      | 6.18168500  | 3.87569300  | -0.90096500 | O  | -0.50630600 | 5.67986400  | 4.65807900  |
| N                                      | 6.99369000  | 4.44821700  | 0.06374500  | O  | -2.43813700 | 4.49888400  | 5.85318800  |
| C                                      | 4.89707100  | 4.10440800  | -0.45889300 | O  | -1.60580600 | 4.04662900  | 8.35124700  |
| C                                      | 6.20615500  | 4.97621300  | 1.02072700  | O  | 5.97054800  | 1.71001300  | 6.43133700  |
| N                                      | 4.91949200  | 4.78860300  | 0.74183500  | O  | 9.47514300  | 4.85854500  | 1.23794000  |
| C                                      | 3.73564500  | 0.46704300  | 1.14584700  | O  | 8.27333700  | 6.66717400  | 2.95139300  |
| C                                      | 3.40784100  | 0.77490000  | 2.61280200  | H  | 0.89321400  | 1.01725900  | -0.41588300 |
| C                                      | 3.89188200  | 2.17433200  | 2.98231700  | H  | -0.82189600 | 1.17691700  | -0.82069400 |
| O                                      | 3.24896600  | 3.12915400  | 2.39911900  | H  | 0.96621100  | 3.78549300  | 0.61072700  |
| O                                      | 4.86111600  | 2.30478800  | 3.75596200  | H  | -1.38093400 | 2.96843500  | 3.99573300  |
| C                                      | -3.34292700 | 9.06300400  | 0.02591800  | H  | -3.66660900 | -1.41058600 | 4.46806900  |
| C                                      | -2.64385100 | 8.08506500  | 0.92704200  | H  | -3.53334700 | 0.31352600  | 4.07830100  |
| N                                      | -3.26768700 | 7.52661900  | 2.03268300  | H  | -2.33658100 | -0.73893200 | 6.69640800  |
| C                                      | -1.37892000 | 7.54087200  | 0.94330400  | H  | -4.03933300 | -0.36169400 | 6.57876300  |

|   |             |             |             |                                                                     |             |             |             |
|---|-------------|-------------|-------------|---------------------------------------------------------------------|-------------|-------------|-------------|
| H | 7.60751500  | 3.81070400  | -2.49567800 | O                                                                   | 5.08744500  | 4.99142400  | 3.60963800  |
| H | 5.96245300  | 3.40594500  | -2.96454100 | H                                                                   | 5.27236300  | 4.03245500  | 3.74849900  |
| H | 3.96693200  | 3.82410200  | -0.93268600 | H                                                                   | -3.49269700 | 5.56738200  | 6.08705600  |
| H | 6.60354100  | 5.47501200  | 1.89314400  | H                                                                   | -2.10360300 | -0.70372100 | 4.25124900  |
| H | 3.33246500  | -0.50840400 | 0.84803300  | H                                                                   | -0.30052200 | 0.00066700  | 0.36106000  |
| H | 3.30170100  | 1.23336100  | 0.49727900  | H                                                                   | 4.79101600  | 0.45035400  | 0.97418700  |
| H | 3.88217100  | 0.05036600  | 3.28017600  | H                                                                   | 6.95073200  | 2.23551600  | -2.15423600 |
| H | 2.32315400  | 0.73396100  | 2.76299500  | H                                                                   | 9.52472300  | 0.51315300  | 3.16131500  |
| H | -4.30586700 | 8.67076300  | -0.32334100 | H                                                                   | 6.98175700  | 10.85915100 | 5.02421400  |
| H | -2.72743300 | 9.25114400  | -0.85764400 | H                                                                   | 4.23037700  | 11.53007800 | 1.76577500  |
| H | -0.56457800 | 7.71260800  | 0.25487100  | H                                                                   | -0.70681500 | 10.72934400 | 3.52654600  |
| H | -2.61943200 | 6.17138100  | 3.56388400  | H                                                                   | -3.52134300 | 10.00487400 | 0.50173900  |
| H | 0.76522000  | 11.65791000 | 3.35962200  | H                                                                   | -4.93707000 | 10.11430900 | 6.71457800  |
| H | 0.58345800  | 10.11678600 | 2.49732900  | O                                                                   | 1.70984300  | 5.70880400  | 1.73568800  |
| H | 0.63835500  | 10.32913500 | 5.56662700  | O                                                                   | 2.20275900  | 5.29355300  | 4.06563900  |
| H | 2.03593200  | 9.87727900  | 4.55709300  | C                                                                   | 1.71932200  | 5.53308700  | 9.76054600  |
| H | 7.81171000  | 0.92099900  | 3.35979200  | N                                                                   | 0.97819300  | 5.31458200  | 8.54990800  |
| H | 8.91742200  | 2.03055000  | 2.53710600  | C                                                                   | 1.30120400  | 5.90700300  | 7.28516500  |
| H | 8.86323300  | 1.35875000  | 5.53115500  | C                                                                   | 2.52114200  | 5.19221200  | 6.65851500  |
| H | 10.27386000 | 2.09344700  | 4.76084200  | C                                                                   | 3.87101000  | 5.68722500  | 7.15759400  |
| H | 3.05345800  | 10.84630500 | 0.66614900  | C                                                                   | 5.05166100  | 4.92717400  | 6.56799900  |
| H | 4.77133800  | 10.84808200 | 0.25441500  | N                                                                   | 6.37244500  | 5.35633500  | 7.12039900  |
| H | 2.63168700  | 8.02299200  | 0.91935300  | H                                                                   | 2.04432000  | 6.57874000  | 9.83028800  |
| H | 5.65045200  | 7.27327700  | 3.73802700  | H                                                                   | 2.61852100  | 4.90066900  | 9.85556800  |
| H | 8.61550700  | 11.50313300 | 5.03901400  | H                                                                   | 0.18637000  | 4.66924900  | 8.56918800  |
| H | 8.22661900  | 10.06215900 | 4.07517200  | H                                                                   | 0.43767000  | 5.80556100  | 6.63731800  |
| H | 8.14449000  | 10.19495300 | 7.15737200  | H                                                                   | 1.52239000  | 6.97661100  | 7.39665800  |
| H | 9.35342600  | 9.35237600  | 6.19863000  | H                                                                   | 2.42311400  | 4.10151400  | 6.72720200  |
| H | -3.29449500 | 9.48158000  | 6.57590400  | H                                                                   | 3.88842500  | 5.59049300  | 8.25744800  |
| H | -4.58535500 | 8.84235200  | 5.55372200  | H                                                                   | 3.97403900  | 6.76143700  | 6.95175100  |
| H | -4.46823500 | 8.54565100  | 8.62626500  | H                                                                   | 5.10004800  | 5.10734500  | 5.49351500  |
| H | -5.79567300 | 7.99866300  | 7.60312600  | H                                                                   | 4.97368300  | 3.84687000  | 6.72798900  |
| H | -1.24178500 | 5.09999900  | 5.01012600  | H                                                                   | 6.47506000  | 5.06889100  | 8.09414900  |
| H | -0.58109900 | 6.64321500  | 5.03984800  | H                                                                   | 7.12229900  | 4.83787000  | 6.56711900  |
| H | -2.73127800 | 3.49998200  | 5.67213900  | H                                                                   | 1.07520200  | 5.31198600  | 10.61782700 |
| H | -1.99548000 | 4.42715400  | 6.74129500  | H                                                                   | 2.34392500  | 5.34298800  | 5.35811600  |
| H | -2.33455400 | 4.63195900  | 8.62646400  | H                                                                   | 6.57389300  | 6.41945100  | 7.08786500  |
| H | -1.97801100 | 3.13430900  | 8.17864800  | H                                                                   | -4.20649700 | 7.71536700  | 2.34965500  |
| H | 5.56935700  | 1.75427600  | 5.54725300  | H                                                                   | 5.85661900  | 9.66985200  | 3.08057600  |
| H | 6.74914400  | 2.29458700  | 6.34639000  | H                                                                   | 8.02055600  | 4.46299700  | 0.19396400  |
| H | 9.24104200  | 5.74746500  | 1.57321000  | H                                                                   | -1.54058600 | 0.98089900  | 2.49625900  |
| H | 9.38102400  | 4.34415200  | 2.06709100  | TS <sub>DE</sub> (Fe <sup>IV</sup> Fe <sup>III</sup> <sub>β</sub> ) |             |             |             |
| H | 7.97490400  | 7.32626200  | 3.60637000  | C                                                                   | -0.11696100 | 0.99113500  | -0.00014200 |
| H | 8.33341400  | 5.84109800  | 3.48300700  | C                                                                   | -0.26283600 | 2.00435200  | 1.09112400  |



|   |             |             |             |    |             |             |             |
|---|-------------|-------------|-------------|----|-------------|-------------|-------------|
| N | -1.05914900 | 1.83831000  | 2.21824700  | C  | 7.43284500  | 8.39132800  | 6.17787700  |
| C | 0.30665700  | 3.23776400  | 1.24877500  | O  | 6.89333400  | 8.06746400  | 5.08327700  |
| C | -0.94043200 | 2.94190900  | 2.99818300  | O  | 7.33210600  | 7.76148600  | 7.26964500  |
| N | -0.11875400 | 3.81069400  | 2.43047600  | C  | -4.35862200 | 9.22912000  | 6.55006800  |
| C | -3.07782700 | -0.50155300 | 4.64513100  | C  | -4.70583900 | 8.19077600  | 7.62736600  |
| C | -3.61678900 | -0.07271000 | 6.01021400  | C  | -4.01531500 | 6.84864400  | 7.44990000  |
| C | -3.29626500 | 1.39326400  | 6.32936300  | O  | -3.51721800 | 6.24054300  | 8.39086900  |
| O | -3.27762100 | 2.17190300  | 5.30883100  | O  | -4.04520300 | 6.42026600  | 6.19834800  |
| O | -3.09919800 | 1.70906600  | 7.52134200  | Fe | 3.43400600  | 5.19518800  | 2.43801400  |
| C | 6.70670900  | 3.27726800  | -2.17077000 | Fe | 0.68859500  | 5.76727700  | 3.05538800  |
| C | 6.13691700  | 3.89880000  | -0.92666000 | O  | -0.57712400 | 5.62965100  | 4.65708900  |
| N | 6.91580300  | 4.59359600  | -0.01617700 | O  | -2.50690900 | 4.44502000  | 5.84422400  |
| C | 4.84288900  | 4.06657800  | -0.47841700 | O  | -1.76226100 | 3.92778100  | 8.34183100  |
| C | 6.10610200  | 5.12747000  | 0.91794600  | O  | 6.40494200  | 1.54548100  | 5.95296300  |
| N | 4.83402900  | 4.83221000  | 0.67363700  | O  | 9.39574200  | 5.27472400  | 0.97717300  |
| C | 3.73563800  | 0.46704600  | 1.14584500  | O  | 8.05477300  | 6.98066000  | 2.79845800  |
| C | 3.40286700  | 0.83809200  | 2.59659500  | H  | 0.89617500  | 1.02125300  | -0.40788300 |
| C | 3.85378500  | 2.26039700  | 2.90037300  | H  | -0.81546700 | 1.17133200  | -0.82761900 |
| O | 3.19354000  | 3.17783700  | 2.28772200  | H  | 1.02709300  | 3.74577100  | 0.62999800  |
| O | 4.82398100  | 2.45135400  | 3.66730300  | H  | -1.45756000 | 3.04140400  | 3.94046700  |
| C | -3.34293700 | 9.06299700  | 0.02593900  | H  | -3.32982900 | -1.54384600 | 4.41670200  |
| C | -2.64409500 | 8.07754000  | 0.90818700  | H  | -3.49425200 | 0.14000000  | 3.86369700  |
| N | -3.26006300 | 7.49286600  | 2.00344600  | H  | -3.21759400 | -0.69425500 | 6.81690600  |
| C | -1.37977600 | 7.53729300  | 0.89980500  | H  | -4.70934400 | -0.18722500 | 6.03316100  |
| C | -2.37365500 | 6.65614000  | 2.59992500  | H  | 7.62017300  | 3.80874700  | -2.46063200 |
| N | -1.22173200 | 6.65852800  | 1.95448200  | H  | 5.99804600  | 3.40806000  | -2.99683200 |
| C | 0.35516400  | 10.64330400 | 3.42697800  | H  | 3.92707000  | 3.69216500  | -0.91255200 |
| C | 0.97523600  | 9.85894100  | 4.58725100  | H  | 6.48281800  | 5.71073300  | 1.74635900  |
| C | 0.51492900  | 8.40838800  | 4.56290000  | H  | 3.34092600  | -0.52487800 | 0.89681900  |
| O | 0.85985700  | 7.74648000  | 3.51817600  | H  | 3.29383900  | 1.19558200  | 0.46034700  |
| O | -0.17338600 | 7.97068300  | 5.51495200  | H  | 3.89297600  | 0.15786100  | 3.29802700  |
| C | 8.83485400  | 1.30891900  | 3.35409200  | H  | 2.31981000  | 0.78336800  | 2.75125500  |
| C | 9.63638200  | 2.36771800  | 4.13801700  | H  | -4.30803700 | 8.67593400  | -0.32407800 |
| C | 8.83657500  | 3.63037600  | 4.44986500  | H  | -2.73215500 | 9.25587500  | -0.86014100 |
| O | 8.77528600  | 4.50537800  | 3.54640500  | H  | -0.57306900 | 7.72953000  | 0.20775100  |
| O | 8.28556500  | 3.68566000  | 5.59385200  | H  | -2.59070100 | 6.10708600  | 3.50072400  |
| C | 4.05792600  | 10.72608500 | 1.08082900  | H  | 0.76395100  | 11.65948100 | 3.37889500  |
| C | 4.13814300  | 9.38374800  | 1.73502200  | H  | 0.57438400  | 10.14201400 | 2.48060200  |
| N | 5.01244000  | 9.07617300  | 2.77188700  | H  | 0.70694000  | 10.29621900 | 5.55252500  |
| C | 3.48380200  | 8.20812000  | 1.47166500  | H  | 2.06678300  | 9.86794100  | 4.49245800  |
| C | 4.87540700  | 7.77090800  | 3.08600000  | H  | 7.99181700  | 0.94037600  | 3.94459800  |
| N | 3.95909400  | 7.22202100  | 2.30908200  | H  | 8.46539300  | 1.71029800  | 2.40582500  |
| C | 8.01612500  | 10.58506100 | 5.01128000  | H  | 9.98185600  | 1.93038000  | 5.08036200  |
| C | 8.30703500  | 9.65587400  | 6.18954700  | H  | 10.51551600 | 2.65888600  | 3.55149200  |

|   |             |             |             |                                                          |             |             |             |
|---|-------------|-------------|-------------|----------------------------------------------------------|-------------|-------------|-------------|
| H | 3.06852400  | 10.86769800 | 0.63756700  | C                                                        | 5.34985500  | 4.79697200  | 6.39841000  |
| H | 4.79624900  | 10.82831200 | 0.27431200  | N                                                        | 6.63822900  | 5.23085800  | 7.01495600  |
| H | 2.70235500  | 7.99890600  | 0.75882400  | H                                                        | 1.14796600  | 6.35175700  | 9.65910000  |
| H | 5.45018300  | 7.28692700  | 3.85696600  | H                                                        | 2.71052900  | 5.51930900  | 9.69313500  |
| H | 8.61481600  | 11.50275600 | 5.05951400  | H                                                        | 0.36013100  | 4.21363500  | 8.47277800  |
| H | 8.23040700  | 10.08676500 | 4.06224900  | H                                                        | 0.68130300  | 5.01655500  | 6.47088900  |
| H | 8.16054200  | 10.16425200 | 7.14883200  | H                                                        | 1.50318400  | 6.37010100  | 7.23107200  |
| H | 9.35585600  | 9.33049200  | 6.17591100  | H                                                        | 2.84778600  | 3.70688100  | 6.42777300  |
| H | -3.29533900 | 9.48578200  | 6.57349500  | H                                                        | 4.11568300  | 5.14421300  | 8.13630100  |
| H | -4.58749300 | 8.83909000  | 5.55452000  | H                                                        | 4.10409800  | 6.47238200  | 6.97926400  |
| H | -4.45797300 | 8.55299900  | 8.62820200  | H                                                        | 5.39428600  | 5.11755300  | 5.36012800  |
| H | -5.78762800 | 7.99825000  | 7.61275300  | H                                                        | 5.34174000  | 3.70295600  | 6.41720300  |
| H | -1.31299800 | 5.07423800  | 5.05123000  | H                                                        | 6.73230500  | 4.87200500  | 7.96535500  |
| H | -0.51252000 | 6.52574700  | 5.13505800  | H                                                        | 7.40122700  | 4.78174000  | 6.42469900  |
| H | -2.90552700 | 3.48467000  | 5.61229700  | H                                                        | 1.31799400  | 4.78673300  | 10.49369300 |
| H | -2.08860800 | 4.30262800  | 6.73903300  | H                                                        | 2.64336000  | 5.10837700  | 5.26789100  |
| H | -2.40117000 | 4.61252700  | 8.61370600  | H                                                        | 6.80268100  | 6.30466100  | 7.05192000  |
| H | -2.28015200 | 3.09467200  | 8.19154700  | H                                                        | -4.19723000 | 7.67153400  | 2.33112500  |
| H | 5.86167300  | 1.72172900  | 5.16677000  | H                                                        | 5.68455600  | 9.67191900  | 3.23518500  |
| H | 7.12921500  | 2.19625500  | 5.87996200  | H                                                        | 7.94246900  | 4.71193600  | 0.07561000  |
| H | 9.11993000  | 6.14968100  | 1.31036600  | H                                                        | -1.62430200 | 1.03666100  | 2.45908300  |
| H | 9.34726300  | 4.75764600  | 1.81307700  | Int E (Fe <sup>III</sup> Fe <sup>IV</sup> <sub>α</sub> ) |             |             |             |
| H | 7.74869400  | 7.56463300  | 3.51814400  | C                                                        | -0.11697400 | 0.99111600  | -0.00015000 |
| H | 8.21386800  | 6.12918000  | 3.26564100  | C                                                        | -0.21969300 | 2.03176800  | 1.06307400  |
| O | 4.88084700  | 5.02882500  | 3.44228200  | N                                                        | -0.83059900 | 1.84581300  | 2.29431600  |
| H | 5.03099500  | 4.04776300  | 3.59459300  | C                                                        | 0.21694400  | 3.32878400  | 1.08240000  |
| H | -3.48541600 | 5.55894600  | 6.09234400  | C                                                        | -0.74071000 | 2.99617800  | 3.00195600  |
| H | -1.98559900 | -0.40969200 | 4.62383900  | N                                                        | -0.11358700 | 3.91429300  | 2.28426100  |
| H | -0.30053300 | 0.00064700  | 0.36105800  | C                                                        | -3.07782600 | -0.50156500 | 4.64512800  |
| H | 4.79102400  | 0.45035000  | 0.97418400  | C                                                        | -3.04712500 | -0.04986200 | 6.10411800  |
| H | 6.95072500  | 2.23552100  | -2.15424300 | C                                                        | -2.68723100 | 1.42902900  | 6.32390600  |
| H | 9.52472000  | 0.51315400  | 3.16130100  | O                                                        | -2.67625200 | 2.16868100  | 5.27718700  |
| H | 6.98175000  | 10.85914800 | 5.02420500  | O                                                        | -2.48108500 | 1.78400700  | 7.50357600  |
| H | 4.23037500  | 11.53008100 | 1.76578600  | C                                                        | 6.70668800  | 3.27728500  | -2.17078000 |
| H | -0.70682700 | 10.72932100 | 3.52655400  | C                                                        | 6.26738600  | 3.92325100  | -0.89455200 |
| H | -3.52133200 | 10.00488000 | 0.50172300  | N                                                        | 7.06537800  | 4.80533000  | -0.18380100 |
| H | -4.93703700 | 10.11434000 | 6.71459300  | C                                                        | 5.05572900  | 3.93814500  | -0.24751200 |
| O | 1.91706100  | 5.61079800  | 1.62705100  | C                                                        | 6.34757900  | 5.30706600  | 0.83550800  |
| O | 2.21801700  | 5.28492200  | 4.01407700  | N                                                        | 5.11386300  | 4.80590200  | 0.82552200  |
| C | 1.62853700  | 5.35708000  | 9.61268600  | C                                                        | 3.73564900  | 0.46704600  | 1.14584600  |
| N | 1.29650700  | 4.61008100  | 8.41540600  | C                                                        | 3.43324100  | 0.74767600  | 2.62418900  |
| C | 1.50209900  | 5.27278400  | 7.13878600  | C                                                        | 3.93476600  | 2.12520800  | 3.05390800  |
| C | 2.81520600  | 4.80099000  | 6.48598300  | O                                                        | 3.46858200  | 3.10286600  | 2.34305700  |
| C | 4.10399800  | 5.37748800  | 7.05862400  | O                                                        | 4.72423800  | 2.23187900  | 4.00861000  |

|    |             |             |             |   |             |             |             |
|----|-------------|-------------|-------------|---|-------------|-------------|-------------|
| C  | -3.34292100 | 9.06301100  | 0.02591900  | H | -3.65094900 | -1.43060600 | 4.53234200  |
| C  | -2.76715600 | 8.07941500  | 0.99295400  | H | -3.55091300 | 0.26799600  | 4.02981900  |
| N  | -3.38101900 | 7.72473200  | 2.18837200  | H | -2.36465300 | -0.65698400 | 6.70819500  |
| C  | -1.58058600 | 7.39706200  | 0.99906300  | H | -4.03840300 | -0.18622700 | 6.55640800  |
| C  | -2.56314100 | 6.87254500  | 2.85875500  | H | 7.58947400  | 3.79633100  | -2.55974800 |
| N  | -1.46636200 | 6.65674700  | 2.15746200  | H | 5.92400600  | 3.39222900  | -2.93007700 |
| C  | 0.35514600  | 10.64327100 | 3.42699300  | H | 4.15533200  | 3.38990300  | -0.47712700 |
| C  | 0.99921100  | 9.87325000  | 4.58173300  | H | 6.76018300  | 6.01064000  | 1.55212900  |
| C  | 0.71316100  | 8.37829600  | 4.52165400  | H | 3.32821700  | -0.50311900 | 0.83893400  |
| O  | 0.71762100  | 7.86933900  | 3.35024800  | H | 3.29540100  | 1.24463500  | 0.51725900  |
| O  | 0.50684500  | 7.75119800  | 5.59385000  | H | 3.89299500  | -0.00371900 | 3.27141500  |
| C  | 8.83485600  | 1.30891300  | 3.35408500  | H | 2.34919500  | 0.72277500  | 2.79037200  |
| C  | 9.62663000  | 2.60516800  | 3.13582400  | H | -4.28883100 | 8.71754700  | -0.41008200 |
| C  | 8.92072300  | 3.93176200  | 3.44542400  | H | -2.63842200 | 9.22386900  | -0.79305200 |
| O  | 9.29226100  | 4.92258100  | 2.74114200  | H | -0.77989100 | 7.40170500  | 0.27621600  |
| O  | 8.09014600  | 3.98323600  | 4.38504500  | H | -2.79614000 | 6.47092100  | 3.83273200  |
| C  | 4.05792400  | 10.72609100 | 1.08083600  | H | 0.75261400  | 11.66425100 | 3.37716100  |
| C  | 4.19352100  | 9.37500200  | 1.71778600  | H | 0.57353300  | 10.14330700 | 2.48142700  |
| N  | 5.08959300  | 9.09712100  | 2.74186500  | H | 0.68773000  | 10.24895000 | 5.56014100  |
| C  | 3.58628200  | 8.17160700  | 1.45228000  | H | 2.09034900  | 9.98106300  | 4.52712000  |
| C  | 5.00921800  | 7.78540500  | 3.04746200  | H | 8.45669000  | 1.22916500  | 4.37610700  |
| N  | 4.10782000  | 7.19275100  | 2.27966000  | H | 7.98491600  | 1.22821500  | 2.66894800  |
| C  | 8.01612300  | 10.58505300 | 5.01126800  | H | 10.52124800 | 2.58452800  | 3.77568300  |
| C  | 8.36440600  | 9.66126400  | 6.17756800  | H | 9.99928200  | 2.65249800  | 2.10692400  |
| C  | 7.64430400  | 8.30409400  | 6.12524700  | H | 3.05232600  | 10.84546500 | 0.66837000  |
| O  | 7.02295000  | 8.01768600  | 5.05975100  | H | 4.76878400  | 10.85224800 | 0.25357700  |
| O  | 7.73632500  | 7.57258200  | 7.15147100  | H | 2.78950900  | 7.94579400  | 0.76097700  |
| C  | -4.35859600 | 9.22914500  | 6.55008700  | H | 5.61694100  | 7.32567600  | 3.80952500  |
| C  | -5.08953200 | 8.05315700  | 7.22243900  | H | 8.60094400  | 11.51292300 | 5.05291800  |
| C  | -4.32504300 | 6.74728800  | 7.13299600  | H | 8.23356100  | 10.09445100 | 4.05826200  |
| O  | -3.94637300 | 6.13801900  | 8.12374700  | H | 8.13806700  | 10.12770900 | 7.14342000  |
| O  | -4.11684200 | 6.36383400  | 5.87869600  | H | 9.44264700  | 9.45573600  | 6.19274200  |
| Fe | 3.91631000  | 5.05495500  | 2.55845700  | H | -3.36361300 | 9.37672400  | 6.98029000  |
| Fe | 0.48775300  | 5.90197400  | 2.77676700  | H | -4.24399000 | 9.06410500  | 5.47577400  |
| O  | -0.11996700 | 5.50996700  | 4.64757900  | H | -5.25792900 | 8.25970600  | 8.28191600  |
| O  | -2.30380000 | 4.61970200  | 5.70701800  | H | -6.06797200 | 7.91206300  | 6.74574400  |
| O  | -1.72644800 | 4.27649400  | 8.20439400  | H | -1.00786700 | 5.16000700  | 4.96295500  |
| O  | 6.78288200  | 2.55703200  | 6.21536700  | H | 0.11367200  | 6.36101200  | 5.17347800  |
| O  | 9.53508700  | 5.87800300  | 0.27480500  | H | -2.52625500 | 3.61865300  | 5.52269400  |
| O  | 8.17098200  | 7.33051400  | 2.52459000  | H | -1.95528800 | 4.57743800  | 6.66140900  |
| H  | 0.88317000  | 0.99781000  | -0.44277200 | H | -2.52696000 | 4.75610200  | 8.47848100  |
| H  | -0.83347600 | 1.17133400  | -0.81172700 | H | -1.99948900 | 3.32878000  | 8.07981800  |
| H  | 0.76126500  | 3.88383900  | 0.33527300  | H | 6.02423700  | 2.25840500  | 5.68927200  |
| H  | -1.13537400 | 3.08394200  | 4.00083100  | H | 7.39426700  | 2.91336300  | 5.52316700  |

|   |             |             |             |                                                            |             |             |             |
|---|-------------|-------------|-------------|------------------------------------------------------------|-------------|-------------|-------------|
| H | 9.21429400  | 6.71306100  | 0.65735400  | H                                                          | -1.29507900 | 1.01666200  | 2.63745000  |
| H | 9.65452200  | 5.34601600  | 1.10213900  | Int E (Fe1 <sup>IV</sup> Fe2 <sup>III</sup> <sub>β</sub> ) |             |             |             |
| H | 7.84528100  | 7.69992300  | 3.36722600  | C                                                          | -0.11697500 | 0.99110600  | -0.00015200 |
| H | 8.56268000  | 6.46117800  | 2.79546200  | C                                                          | -0.18905800 | 2.00360400  | 1.09272200  |
| O | 5.13503600  | 4.91169800  | 3.88143300  | N                                                          | -0.91540900 | 1.85730100  | 2.26722500  |
| H | 5.27459200  | 3.94971100  | 4.05501700  | C                                                          | 0.38193100  | 3.24307900  | 1.18741100  |
| H | -3.45984700 | 5.56388300  | 5.84569000  | C                                                          | -0.75838500 | 2.97462400  | 3.01414300  |
| H | -2.10360200 | -0.70372800 | 4.25124900  | N                                                          | 0.01864800  | 3.83791500  | 2.37813500  |
| H | -0.30052200 | 0.00066300  | 0.36106200  | C                                                          | -3.07782000 | -0.50155900 | 4.64512800  |
| H | 4.79101400  | 0.45035100  | 0.97418700  | C                                                          | -3.43713400 | 0.07623400  | 6.00781600  |
| H | 6.95074400  | 2.23550700  | -2.15423200 | C                                                          | -3.28626800 | 1.59980000  | 6.09949800  |
| H | 9.52471800  | 0.51316000  | 3.16130900  | O                                                          | -3.09251900 | 2.20763200  | 4.98825500  |
| H | 6.98175200  | 10.85915500 | 5.02421300  | O                                                          | -3.39128300 | 2.10816800  | 7.23608300  |
| H | 4.23038000  | 11.53007900 | 1.76577800  | C                                                          | 6.70669700  | 3.27727900  | -2.17077800 |
| H | -0.70681700 | 10.72934400 | 3.52654500  | C                                                          | 6.18248700  | 4.04204900  | -0.98888400 |
| H | -3.52134800 | 10.00486800 | 0.50173700  | N                                                          | 6.96650000  | 4.86316400  | -0.19188900 |
| H | -4.93705400 | 10.11432500 | 6.71457800  | C                                                          | 4.92408700  | 4.11273200  | -0.43500500 |
| O | 1.07655900  | 6.13814600  | 1.27959600  | C                                                          | 6.19006800  | 5.37249200  | 0.78606400  |
| O | 2.20420900  | 5.35497100  | 3.46720200  | N                                                          | 4.93847800  | 4.94610600  | 0.66789500  |
| C | 0.42510400  | 7.24807700  | 9.26752500  | C                                                          | 3.73565300  | 0.46705200  | 1.14584900  |
| N | 1.50436800  | 8.00049600  | 8.63491500  | C                                                          | 3.65172300  | 0.83201900  | 2.62994000  |
| C | 2.85080000  | 7.58044500  | 9.02937600  | C                                                          | 4.03885800  | 2.28073400  | 2.91147700  |
| C | 3.31061100  | 6.23301100  | 8.55315100  | O                                                          | 3.40687400  | 3.16983400  | 2.22818400  |
| C | 4.74418900  | 5.91917300  | 8.24786600  | O                                                          | 4.92068200  | 2.51481500  | 3.76679800  |
| C | 4.97739600  | 5.77574900  | 6.73366800  | C                                                          | -3.34293000 | 9.06301400  | 0.02594200  |
| N | 6.38095900  | 5.40017400  | 6.40576600  | C                                                          | -2.58937100 | 8.06230900  | 0.85660200  |
| H | 0.46948600  | 7.39273400  | 10.35534700 | N                                                          | -3.18386200 | 7.31635500  | 1.86531600  |
| H | 0.41568300  | 6.16231900  | 9.07549300  | C                                                          | -1.28007900 | 7.63603800  | 0.84687100  |
| H | 1.39969800  | 7.93987200  | 7.62269000  | C                                                          | -2.24792600 | 6.50270000  | 2.40695600  |
| H | 3.56644200  | 8.34168400  | 8.68173800  | N                                                          | -1.07822600 | 6.66556500  | 1.81430600  |
| H | 2.89087200  | 7.63631400  | 10.13425500 | C                                                          | 0.35514000  | 10.64326500 | 3.42699400  |
| H | 2.57184300  | 5.44353300  | 8.43058500  | C                                                          | 0.79800800  | 9.85947900  | 4.66386100  |
| H | 5.04596700  | 4.97946100  | 8.73707900  | C                                                          | 0.54567000  | 8.35522000  | 4.59582000  |
| H | 5.40897400  | 6.70566300  | 8.62666500  | O                                                          | 0.90678800  | 7.75470100  | 3.51715600  |
| H | 4.78201800  | 6.72197900  | 6.22719500  | O                                                          | 0.03133000  | 7.80272800  | 5.59673800  |
| H | 4.31949700  | 5.02028900  | 6.30225400  | C                                                          | 8.83485000  | 1.30891600  | 3.35408600  |
| H | 6.59078300  | 4.42579600  | 6.68856300  | C                                                          | 9.25580400  | 2.66757700  | 2.79738500  |
| H | 6.50484000  | 5.39975300  | 5.38262500  | C                                                          | 8.93364600  | 3.90498000  | 3.63893600  |
| H | -0.53595300 | 7.64091000  | 8.92004500  | O                                                          | 9.28637600  | 5.01006700  | 3.13665900  |
| H | 2.07627800  | 4.93105400  | 4.32757100  | O                                                          | 8.36708500  | 3.74442000  | 4.75700500  |
| H | 7.04164400  | 6.15575700  | 6.78576900  | C                                                          | 4.05792600  | 10.72609500 | 1.08083700  |
| H | -4.28169000 | 8.03629100  | 2.51950400  | C                                                          | 4.18355200  | 9.38409900  | 1.71843000  |
| H | 5.75037700  | 9.71671100  | 3.18968400  | N                                                          | 5.06302000  | 9.11589600  | 2.76118700  |
| H | 8.06397500  | 5.08250900  | -0.28612600 | C                                                          | 3.54960600  | 8.19529000  | 1.47918700  |

|    |             |             |             |   |             |             |             |
|----|-------------|-------------|-------------|---|-------------|-------------|-------------|
| C  | 4.95394200  | 7.81506800  | 3.10183100  | H | 9.29350700  | 1.10746100  | 4.32576300  |
| N  | 4.04341400  | 7.23684700  | 2.33736900  | H | 7.75206700  | 1.23235200  | 3.47392400  |
| C  | 8.01612200  | 10.58506300 | 5.01127000  | H | 10.33839300 | 2.68702200  | 2.61399100  |
| C  | 8.39706700  | 9.71818100  | 6.20561600  | H | 8.79502300  | 2.83197700  | 1.81447600  |
| C  | 7.71582800  | 8.34162400  | 6.20145300  | H | 3.10062500  | 10.81515400 | 0.56220800  |
| O  | 7.01600700  | 8.02350500  | 5.20110000  | H | 4.85685400  | 10.91877100 | 0.35370500  |
| O  | 7.92342800  | 7.62306000  | 7.22483300  | H | 2.77218300  | 7.95488800  | 0.77218600  |
| C  | -4.35860200 | 9.22914800  | 6.55006600  | H | 5.54850300  | 7.34808000  | 3.86995100  |
| C  | -5.40729900 | 8.38381600  | 5.79027900  | H | 8.49353300  | 11.57136100 | 5.05658200  |
| C  | -5.01448400 | 6.92528900  | 5.78746700  | H | 8.31308100  | 10.10544900 | 4.07374300  |
| O  | -5.09383100 | 6.24568800  | 6.80118500  | H | 8.14869000  | 10.21022100 | 7.15365300  |
| O  | -4.53119500 | 6.49140500  | 4.62700800  | H | 9.48056800  | 9.54761700  | 6.23545400  |
| Fe | 3.57669300  | 5.19977500  | 2.39714700  | H | -4.09618800 | 8.75120000  | 7.49655200  |
| Fe | 0.76631200  | 5.78788700  | 2.94746100  | H | -3.44886500 | 9.39043300  | 5.96745700  |
| O  | -0.37161800 | 5.46935900  | 4.67485300  | H | -6.36691800 | 8.46043700  | 6.31123200  |
| O  | -2.85803700 | 4.68898100  | 5.13816800  | H | -5.53684100 | 8.75506900  | 4.76929700  |
| O  | -2.90674300 | 4.67949500  | 7.73997300  | H | -1.29608300 | 5.13088200  | 4.81287600  |
| O  | 6.63059700  | 1.92947100  | 6.03423000  | H | -0.27110400 | 6.33132600  | 5.19129000  |
| O  | 9.41127200  | 5.87001200  | 0.56002300  | H | -3.02526200 | 3.65962400  | 5.05163700  |
| O  | 8.12250100  | 7.39925400  | 2.69051900  | H | -2.78857400 | 4.79364800  | 6.14420200  |
| H  | 0.86387600  | 1.02591900  | -0.48052700 | H | -3.77636800 | 5.11121700  | 7.76842600  |
| H  | -0.87076300 | 1.17429700  | -0.77720500 | H | -3.09505800 | 3.70293700  | 7.66946700  |
| H  | 1.05877100  | 3.74328300  | 0.51454400  | H | 5.93634000  | 1.90121300  | 5.35672400  |
| H  | -1.21815800 | 3.08514000  | 3.98185900  | H | 7.34076700  | 2.41429900  | 5.57033000  |
| H  | -3.33092300 | -1.56743300 | 4.58309700  | H | 9.07319600  | 6.71625900  | 0.90127600  |
| H  | -3.61795900 | 0.02675200  | 3.85499300  | H | 9.53394800  | 5.37881700  | 1.41029100  |
| H  | -2.83857300 | -0.36980300 | 6.80937100  | H | 7.75451800  | 7.79534200  | 3.50370400  |
| H  | -4.48204000 | -0.15379700 | 6.25505200  | H | 8.51604800  | 6.56336600  | 3.03105900  |
| H  | 7.06323400  | 3.94399100  | -2.96575400 | O | 4.98156900  | 5.08702600  | 3.47510800  |
| H  | 5.91241400  | 2.65292000  | -2.58805000 | H | 5.11181200  | 4.11644900  | 3.69832500  |
| H  | 4.02184700  | 3.60713700  | -0.74465600 | H | -3.97592000 | 5.63090700  | 4.80601000  |
| H  | 6.58160200  | 6.01893700  | 1.56152700  | H | -2.00375900 | -0.41775200 | 4.43837000  |
| H  | 3.39810100  | -0.56220900 | 0.97962700  | H | -0.27525400 | -0.03286200 | 0.35317000  |
| H  | 3.09881200  | 1.13704500  | 0.56210300  | H | 4.75170600  | 0.54870600  | 0.74668600  |
| H  | 4.29392200  | 0.18860800  | 3.23671000  | H | 7.54140100  | 2.62228400  | -1.89559600 |
| H  | 2.61900100  | 0.69888900  | 2.97599100  | H | 9.17989000  | 0.56110900  | 2.63494500  |
| H  | -4.18614000 | 8.60001000  | -0.50035200 | H | 6.93171600  | 10.73595200 | 4.98777200  |
| H  | -2.67597700 | 9.49165300  | -0.72593500 | H | 4.11024400  | 11.51327300 | 1.84214100  |
| H  | -0.47453200 | 7.96614300  | 0.20775500  | H | -0.72916600 | 10.66884800 | 3.27593000  |
| H  | -2.45484900 | 5.83676700  | 3.22723000  | H | -3.73802600 | 9.88936600  | 0.62798000  |
| H  | 0.68982400  | 11.68460900 | 3.49841400  | H | -4.84896700 | 10.18356500 | 6.76588000  |
| H  | 0.80260600  | 10.20584800 | 2.53020900  | O | 2.06748100  | 5.59843100  | 1.56761900  |
| H  | 0.31987800  | 10.23294300 | 5.57284100  | O | 2.33919100  | 5.19858900  | 3.96716100  |
| H  | 1.88128900  | 9.98730300  | 4.79027300  | C | 0.56102700  | 5.26305500  | 8.64463500  |

|                                                           |             |             |             |    |             |             |            |
|-----------------------------------------------------------|-------------|-------------|-------------|----|-------------|-------------|------------|
| N                                                         | 1.23027900  | 6.53452400  | 8.39413400  | C  | 3.39048000  | 0.76205700  | 2.61222100 |
| C                                                         | 2.67334500  | 6.51457100  | 8.59191100  | C  | 3.81535700  | 2.17138600  | 3.02458400 |
| C                                                         | 3.50767700  | 5.65275600  | 7.68413200  | O  | 3.24136900  | 3.11669200  | 2.34942200 |
| C                                                         | 5.00016200  | 5.68471500  | 7.80376200  | O  | 4.65896300  | 2.32128400  | 3.92444600 |
| C                                                         | 5.71772300  | 5.05578000  | 6.60867900  | C  | -3.34292900 | 9.06301300  | 0.02590900 |
| N                                                         | 7.20024000  | 5.14884300  | 6.75298400  | C  | -2.63642600 | 8.11344300  | 0.95010700 |
| H                                                         | 0.67826800  | 4.99674200  | 9.70387300  | N  | -3.20579700 | 7.68478000  | 2.14060900 |
| H                                                         | 0.93685000  | 4.40937800  | 8.05263800  | C  | -1.39946400 | 7.51166600  | 0.93048900 |
| H                                                         | 0.99762100  | 6.88595700  | 7.46828600  | C  | -2.32354100 | 6.87488500  | 2.77811900 |
| H                                                         | 3.04595200  | 7.55045400  | 8.53489000  | N  | -1.21627700 | 6.74796300  | 2.06935600 |
| H                                                         | 2.85459700  | 6.21243500  | 9.64296400  | C  | 0.35519400  | 10.64326200 | 3.42699100 |
| H                                                         | 3.04323500  | 4.79566300  | 7.19752500  | C  | 0.97439400  | 9.91254700  | 4.62422900 |
| H                                                         | 5.30998600  | 5.15503100  | 8.72771800  | C  | 0.59233300  | 8.43668600  | 4.61718000 |
| H                                                         | 5.35167400  | 6.71798700  | 7.93188700  | O  | 0.98890800  | 7.78001200  | 3.59306500 |
| H                                                         | 5.46527800  | 5.57637100  | 5.68548200  | O  | -0.07465100 | 7.96998100  | 5.57704000 |
| H                                                         | 5.47638600  | 3.99653500  | 6.49152600  | C  | 8.83484300  | 1.30892200  | 3.35408600 |
| H                                                         | 7.51121800  | 4.55965500  | 7.52563700  | C  | 9.67764200  | 2.59190000  | 3.43777900 |
| H                                                         | 7.68279900  | 4.77675200  | 5.89017200  | C  | 8.90586300  | 3.90526400  | 3.61837000 |
| H                                                         | -0.50924200 | 5.35779300  | 8.44161700  | O  | 9.23541900  | 4.85653700  | 2.84915500 |
| H                                                         | 2.68312400  | 5.52188900  | 4.81141000  | O  | 8.04430400  | 3.97466100  | 4.53381100 |
| H                                                         | 7.50391500  | 6.18164500  | 6.93842800  | C  | 4.05790800  | 10.72609100 | 1.08082200 |
| H                                                         | -4.12054000 | 7.39411300  | 2.23753100  | C  | 4.16042000  | 9.38682800  | 1.72818200 |
| H                                                         | 5.73056000  | 9.73929900  | 3.19341400  | N  | 5.10851200  | 9.07007100  | 2.69200700 |
| H                                                         | 7.97903500  | 5.09048100  | -0.19706400 | C  | 3.46844600  | 8.22186400  | 1.52127400 |
| H                                                         | -1.49000800 | 1.07666600  | 2.55256300  | C  | 4.97540000  | 7.76562900  | 3.01356400 |
| <b>TS<sub>EF</sub> (Fe<sup>III</sup>Fe<sup>IV</sup>α)</b> |             |             |             | N  | 3.98805200  | 7.22553600  | 2.32079000 |
| C                                                         | -0.11698200 | 0.99112500  | -0.00014800 | C  | 8.01611200  | 10.58504800 | 5.01126900 |
| C                                                         | -0.23464200 | 2.00644800  | 1.09151900  | C  | 8.33735100  | 9.63326400  | 6.16744200 |
| N                                                         | -0.94559300 | 1.81546900  | 2.27062700  | C  | 7.55625900  | 8.30774600  | 6.10756800 |
| C                                                         | 0.29088200  | 3.26364000  | 1.20418300  | O  | 7.00973500  | 8.01192500  | 5.00489000 |
| C                                                         | -0.82381300 | 2.92646000  | 3.03627100  | O  | 7.52540000  | 7.61004000  | 7.16108500 |
| N                                                         | -0.08068400 | 3.82485700  | 2.40889100  | C  | -4.35859000 | 9.22913700  | 6.55006200 |
| C                                                         | -3.07782100 | -0.50155400 | 4.64513000  | C  | -4.88302700 | 8.13274200  | 7.49219400 |
| C                                                         | -3.04723800 | -0.10161300 | 6.12058300  | C  | -4.19328900 | 6.79403000  | 7.31397600 |
| C                                                         | -2.73812200 | 1.38238700  | 6.36368400  | O  | -3.72512300 | 6.16358000  | 8.25386600 |
| O                                                         | -2.87481400 | 2.14404000  | 5.34278400  | O  | -4.17574000 | 6.39914800  | 6.04808800 |
| O                                                         | -2.42854100 | 1.72322900  | 7.52576300  | Fe | 3.61374500  | 5.08658900  | 2.43091100 |
| C                                                         | 6.70668000  | 3.27729000  | -2.17078200 | Fe | 0.67810900  | 5.77386300  | 2.97244300 |
| C                                                         | 6.15711300  | 3.92289000  | -0.94137400 | O  | -0.40269800 | 5.61183200  | 4.69084500 |
| N                                                         | 6.91457600  | 4.77590400  | -0.15806200 | O  | -2.49159600 | 4.55338200  | 5.74959400 |
| C                                                         | 4.88808200  | 3.98730800  | -0.41417800 | O  | -1.61708100 | 4.18543200  | 8.21718700 |
| C                                                         | 6.11962100  | 5.30055200  | 0.78965500  | O  | 6.52599400  | 2.56618100  | 6.21450800 |
| N                                                         | 4.87339400  | 4.84956300  | 0.66384300  | O  | 9.41950500  | 5.79686700  | 0.34271100 |
| C                                                         | 3.73563500  | 0.46704000  | 1.14584700  | O  | 8.11906000  | 7.25548900  | 2.49092100 |

|   |             |             |             |   |             |             |             |
|---|-------------|-------------|-------------|---|-------------|-------------|-------------|
| H | 0.88841200  | 1.01168800  | -0.42807000 | H | -2.37984400 | 4.70106300  | 8.53365200  |
| H | -0.82931300 | 1.17755900  | -0.81410100 | H | -1.92447900 | 3.24610700  | 8.08162800  |
| H | 0.94114600  | 3.80231400  | 0.53517700  | H | 5.80672500  | 2.33863200  | 5.60076700  |
| H | -1.28082100 | 3.00597400  | 4.01004000  | H | 7.23171600  | 2.88142600  | 5.59702800  |
| H | -3.65929800 | -1.42052500 | 4.49790100  | H | 9.08929000  | 6.61982700  | 0.74786700  |
| H | -3.54308700 | 0.29464300  | 4.05985000  | H | 9.57286200  | 5.26010600  | 1.15612000  |
| H | -2.33793400 | -0.70095900 | 6.69993200  | H | 7.83156400  | 7.68292900  | 3.31924000  |
| H | -4.03065400 | -0.28200800 | 6.57530200  | H | 8.46237700  | 6.37935300  | 2.80063600  |
| H | 7.62059500  | 3.79931900  | -2.47608300 | O | 5.10411600  | 4.99392300  | 3.52139200  |
| H | 5.99758000  | 3.40053900  | -2.99893300 | H | 5.25856500  | 4.05018500  | 3.73899300  |
| H | 3.99461500  | 3.47504000  | -0.73914800 | H | -3.57781100 | 5.56337600  | 5.94609900  |
| H | 6.49308900  | 5.97098200  | 1.55224500  | H | -2.10360400 | -0.70373700 | 4.25124700  |
| H | 3.33588300  | -0.50760300 | 0.84058300  | H | -0.30051600 | 0.00066200  | 0.36106500  |
| H | 3.30021300  | 1.23445900  | 0.50020100  | H | 4.79102700  | 0.45035500  | 0.97418700  |
| H | 3.87214800  | 0.04535500  | 3.28264100  | H | 6.95075200  | 2.23550100  | -2.15423200 |
| H | 2.30502200  | 0.68655400  | 2.74944200  | H | 9.52472900  | 0.51315500  | 3.16130900  |
| H | -4.30579500 | 8.66233300  | -0.31381200 | H | 6.98176100  | 10.85916000 | 5.02421200  |
| H | -2.72834300 | 9.24337300  | -0.85926200 | H | 4.23039100  | 11.53007900 | 1.76578900  |
| H | -0.62478000 | 7.58283100  | 0.18147100  | H | -0.70685400 | 10.72934500 | 3.52655300  |
| H | -2.51777200 | 6.43332300  | 3.74161500  | H | -3.52134100 | 10.00486600 | 0.50174300  |
| H | 0.75825500  | 11.65875700 | 3.33743900  | H | -4.93705800 | 10.11433000 | 6.71459600  |
| H | 0.58132100  | 10.10199400 | 2.50503100  | O | 1.70924200  | 5.71514500  | 1.60784300  |
| H | 0.65989600  | 10.35848500 | 5.57165800  | O | 2.26708400  | 5.35118300  | 4.05020100  |
| H | 2.06681900  | 9.97211500  | 4.55905400  | C | 1.68701000  | 4.64243900  | 10.11430600 |
| H | 8.28927200  | 1.11603000  | 4.28112200  | N | 0.95490000  | 5.48724600  | 9.18520400  |
| H | 8.11017200  | 1.35622700  | 2.53452400  | C | 1.73631500  | 6.32946800  | 8.26651200  |
| H | 10.36296100 | 2.50607000  | 4.29308200  | C | 2.63149900  | 5.50267900  | 7.40571900  |
| H | 10.30181600 | 2.68637900  | 2.54356600  | C | 4.09858000  | 5.35195500  | 7.60457900  |
| H | 3.06136000  | 10.85858300 | 0.65061800  | C | 4.82992900  | 5.76054300  | 6.30647200  |
| H | 4.78419300  | 10.83987700 | 0.26454200  | N | 6.27232000  | 5.40271800  | 6.29150600  |
| H | 2.62693400  | 8.02828300  | 0.87556300  | H | 2.37172800  | 5.25822200  | 10.71169000 |
| H | 5.61232800  | 7.26435700  | 3.72021100  | H | 2.28127700  | 3.83126400  | 9.66159300  |
| H | 8.60734900  | 11.50692800 | 5.07815200  | H | 0.18572600  | 4.99192100  | 8.72979600  |
| H | 8.23789300  | 10.10967100 | 4.05190100  | H | 1.02730500  | 6.89675900  | 7.65184500  |
| H | 8.14130200  | 10.10072100 | 7.13911000  | H | 2.32108200  | 7.04495800  | 8.86017100  |
| H | 9.40616800  | 9.38116500  | 6.16678700  | H | 2.16115500  | 4.88201100  | 6.64422600  |
| H | -3.30291100 | 9.44692500  | 6.73564100  | H | 4.33985700  | 4.29286100  | 7.80074100  |
| H | -4.46432600 | 8.92421900  | 5.50622600  | H | 4.45003300  | 5.94141100  | 8.45937100  |
| H | -4.77064700 | 8.42323200  | 8.53946300  | H | 4.77409400  | 6.83977000  | 6.14925100  |
| H | -5.95428700 | 7.97800300  | 7.30547600  | H | 4.37610300  | 5.26303500  | 5.45340700  |
| H | -1.22359600 | 5.12549100  | 4.98405700  | H | 6.41248800  | 4.41904000  | 6.59533500  |
| H | -0.34187000 | 6.50337600  | 5.17272000  | H | 6.61191600  | 5.39631600  | 5.31494500  |
| H | -2.72688300 | 3.54368300  | 5.57611500  | H | 0.96851300  | 4.17937100  | 10.79785800 |
| H | -2.05556800 | 4.51281200  | 6.64933200  | H | 2.48577900  | 6.19282400  | 4.47884800  |

|                                                                   |             |             |             |    |             |             |             |
|-------------------------------------------------------------------|-------------|-------------|-------------|----|-------------|-------------|-------------|
| H                                                                 | 6.84939600  | 6.15933800  | 6.78474300  | C  | 4.05796900  | 10.72608600 | 1.08084900  |
| H                                                                 | -4.11698800 | 7.93430300  | 2.49479500  | C  | 4.20968000  | 9.38662100  | 1.72204300  |
| H                                                                 | 5.82656400  | 9.65719800  | 3.09212600  | N  | 5.19753000  | 9.07657700  | 2.65068500  |
| H                                                                 | 7.92397800  | 5.02806500  | -0.19217600 | C  | 3.51867500  | 8.21676300  | 1.54578800  |
| H                                                                 | -1.47103200 | 0.99857400  | 2.54791800  | C  | 5.07930300  | 7.77152000  | 2.98950200  |
| TS <sub>EF</sub> (Fe <sup>I</sup> Fe <sup>II</sup> <sub>β</sub> ) |             |             |             | N  | 4.07021300  | 7.22985600  | 2.33199000  |
| C                                                                 | -0.11700900 | 0.99114800  | -0.00016100 | C  | 8.01607400  | 10.58505500 | 5.01120300  |
| C                                                                 | -0.23590300 | 2.00265400  | 1.09668500  | C  | 8.30672900  | 9.68509100  | 6.21492300  |
| N                                                                 | -1.00927200 | 1.83145200  | 2.23960200  | C  | 7.45159800  | 8.40694300  | 6.19990200  |
| C                                                                 | 0.33565400  | 3.23605800  | 1.24800800  | O  | 7.11026200  | 7.95535200  | 5.07512500  |
| C                                                                 | -0.87699700 | 2.93176400  | 3.02099200  | O  | 7.16234200  | 7.89344500  | 7.32249300  |
| N                                                                 | -0.06941600 | 3.80482000  | 2.44008300  | C  | -4.35863100 | 9.22912000  | 6.55004000  |
| C                                                                 | -3.07777200 | -0.50147000 | 4.64513000  | C  | -4.74501600 | 8.18893600  | 7.61338700  |
| C                                                                 | -3.05504200 | -0.13955500 | 6.13044300  | C  | -4.08381900 | 6.83433200  | 7.42998900  |
| C                                                                 | -2.78164700 | 1.34515000  | 6.40639800  | O  | -3.58426700 | 6.21560000  | 8.36292100  |
| O                                                                 | -2.95052200 | 2.12571500  | 5.40578200  | O  | -4.13726500 | 6.40807200  | 6.17753600  |
| O                                                                 | -2.46755100 | 1.66660900  | 7.57365400  | Fe | 3.54750600  | 5.12378000  | 2.46196600  |
| C                                                                 | 6.70677600  | 3.27729100  | -2.17073600 | Fe | 0.73100000  | 5.76694300  | 3.01597600  |
| C                                                                 | 6.19540400  | 3.86665500  | -0.89228500 | O  | -0.46789500 | 5.60607700  | 4.72706500  |
| N                                                                 | 7.01793300  | 4.38921400  | 0.09216000  | O  | -2.52020300 | 4.51183400  | 5.84998900  |
| C                                                                 | 4.91488600  | 4.10597900  | -0.44577300 | O  | -1.59947300 | 4.08664200  | 8.31170600  |
| C                                                                 | 6.24032100  | 4.89969000  | 1.06638000  | O  | 5.87492000  | 1.86283300  | 6.49007600  |
| N                                                                 | 4.95305400  | 4.74855700  | 0.77597700  | O  | 9.51295600  | 4.86725300  | 1.19953600  |
| C                                                                 | 3.73564800  | 0.46692500  | 1.14587500  | O  | 8.32938300  | 6.70953900  | 2.92438200  |
| C                                                                 | 3.41916600  | 0.76636300  | 2.61923400  | H  | 0.88911500  | 1.01503000  | -0.42557300 |
| C                                                                 | 3.87117100  | 2.17567900  | 3.00264000  | H  | -0.82892000 | 1.17866300  | -0.81457000 |
| O                                                                 | 3.23854800  | 3.11511000  | 2.38986000  | H  | 1.04388300  | 3.75289900  | 0.62190300  |
| O                                                                 | 4.79930000  | 2.32995100  | 3.82200000  | H  | -1.37201800 | 3.02026300  | 3.97580300  |
| C                                                                 | -3.34287700 | 9.06299700  | 0.02592800  | H  | -3.66649200 | -1.41124400 | 4.47052100  |
| C                                                                 | -2.62367700 | 8.10523800  | 0.92886900  | H  | -3.53416000 | 0.31320500  | 4.07867600  |
| N                                                                 | -3.20827700 | 7.58663800  | 2.07480700  | H  | -2.33077800 | -0.73514900 | 6.69470100  |
| C                                                                 | -1.36188400 | 7.55771200  | 0.91498100  | H  | -4.03353000 | -0.35367700 | 6.58118100  |
| C                                                                 | -2.30862400 | 6.77980300  | 2.69241800  | H  | 7.60387100  | 3.81128100  | -2.50528300 |
| N                                                                 | -1.17607900 | 6.73866500  | 2.01424900  | H  | 5.95228600  | 3.40647800  | -2.95430500 |
| C                                                                 | 0.35516500  | 10.64329300 | 3.42696200  | H  | 3.97835600  | 3.86062500  | -0.92548500 |
| C                                                                 | 0.97340900  | 9.88834500  | 4.60733800  | H  | 6.63800200  | 5.36755000  | 1.95438600  |
| C                                                                 | 0.50829400  | 8.44014200  | 4.57920300  | H  | 3.33118000  | -0.50732200 | 0.84671100  |
| O                                                                 | 1.01359500  | 7.72691700  | 3.64305300  | H  | 3.29849400  | 1.23757000  | 0.50532000  |
| O                                                                 | -0.34223800 | 8.05825600  | 5.42162200  | H  | 3.91136800  | 0.04719400  | 3.27970700  |
| C                                                                 | 8.83480800  | 1.30886100  | 3.35405700  | H  | 2.33696000  | 0.70392400  | 2.78113200  |
| C                                                                 | 9.25002900  | 2.02870600  | 4.64274700  | H  | -4.30771600 | 8.66077400  | -0.30636800 |
| C                                                                 | 8.62180200  | 3.41788800  | 4.78250500  | H  | -2.74029000 | 9.24975900  | -0.86652100 |
| O                                                                 | 8.80151900  | 4.22154200  | 3.83281800  | H  | -0.57474800 | 7.70218800  | 0.18956000  |
| O                                                                 | 7.99286300  | 3.65078300  | 5.86197000  | H  | -2.50601500 | 6.27471900  | 3.62354900  |



|   |             |             |             |              |             |             |             |
|---|-------------|-------------|-------------|--------------|-------------|-------------|-------------|
| H | 0.76211900  | 11.65862100 | 3.35212600  | H            | -4.93703100 | 10.11434000 | 6.71461200  |
| H | 0.57668500  | 10.11906300 | 2.49321300  | O            | 1.94189500  | 5.60480300  | 1.65772700  |
| H | 0.68455100  | 10.34102900 | 5.55982100  | O            | 2.33752700  | 5.29641600  | 4.17349900  |
| H | 2.06470200  | 9.90432700  | 4.52087500  | C            | 1.64106700  | 5.27966400  | 10.03425100 |
| H | 7.81791200  | 0.91184800  | 3.42771400  | N            | 0.88418700  | 5.58477200  | 8.84201100  |
| H | 8.86892200  | 1.99965300  | 2.50728100  | C            | 1.48484900  | 6.33705100  | 7.74475300  |
| H | 9.00566500  | 1.42785100  | 5.52311900  | C            | 2.59002100  | 5.51656400  | 7.16515700  |
| H | 10.33817500 | 2.17911600  | 4.63449700  | C            | 4.00308300  | 5.74855800  | 7.56090100  |
| H | 3.04548300  | 10.83430500 | 0.68285500  | C            | 5.03198600  | 5.03135800  | 6.68677800  |
| H | 4.75589100  | 10.86181600 | 0.24328400  | N            | 6.42663400  | 5.36429600  | 7.09626700  |
| H | 2.65924400  | 8.00978900  | 0.92824500  | H            | 2.12575500  | 6.18954400  | 10.41146700 |
| H | 5.72460300  | 7.27621500  | 3.69656000  | H            | 2.42230300  | 4.50662900  | 9.92770600  |
| H | 8.61453000  | 11.50362700 | 5.03169100  | H            | 0.17363300  | 4.90058000  | 8.57866100  |
| H | 8.22745900  | 10.05521800 | 4.07911400  | H            | 0.70859500  | 6.54864400  | 7.00748800  |
| H | 8.13598000  | 10.21003800 | 7.16045200  | H            | 1.86373000  | 7.29573700  | 8.12390100  |
| H | 9.36110300  | 9.37686800  | 6.21476400  | H            | 2.32079400  | 4.60681300  | 6.63549900  |
| H | -3.29362500 | 9.47398100  | 6.59658700  | H            | 4.10633100  | 5.41355700  | 8.61537800  |
| H | -4.57348000 | 8.84897100  | 5.54858600  | H            | 4.20942100  | 6.82938800  | 7.59676800  |
| H | -4.50229000 | 8.53688200  | 8.62052400  | H            | 4.93447600  | 5.32479300  | 5.63927900  |
| H | -5.83089200 | 8.02376900  | 7.58042500  | H            | 4.93141900  | 3.94220000  | 6.73909500  |
| H | -1.24748400 | 5.08344300  | 5.05468900  | H            | 6.61971000  | 5.00454800  | 8.03188900  |
| H | -0.53075400 | 6.53919800  | 5.10308400  | H            | 7.10583500  | 4.84974900  | 6.45037700  |
| H | -2.77992800 | 3.50992100  | 5.66293800  | H            | 0.94461800  | 4.92840300  | 10.80260300 |
| H | -2.06254400 | 4.45074800  | 6.73271100  | H            | 2.66610600  | 6.09906300  | 4.60607000  |
| H | -2.33774400 | 4.64275800  | 8.61828400  | H            | 6.65459400  | 6.42804800  | 7.10772300  |
| H | -1.94851500 | 3.16460300  | 8.15423300  | H            | -4.13503200 | 7.78687100  | 2.41943400  |
| H | 5.45896400  | 1.84600500  | 5.61116200  | H            | 5.90305200  | 9.68439000  | 3.04117100  |
| H | 6.69767500  | 2.36489300  | 6.32919000  | H            | 8.04666000  | 4.41700400  | 0.20262200  |
| H | 9.27525000  | 5.76149400  | 1.51562500  | H            | -1.56562100 | 1.02686500  | 2.49052300  |
| H | 9.43198100  | 4.36989300  | 2.04087400  | <b>Pro F</b> |             |             |             |
| H | 8.02840000  | 7.35823400  | 3.58729700  | C            | -0.11700700 | 0.99114400  | -0.00015800 |
| H | 8.39510700  | 5.87869900  | 3.44740900  | C            | -0.31198900 | 2.01186200  | 1.07226100  |
| O | 5.00536400  | 5.02827100  | 3.58649400  | N            | -0.98631400 | 1.78195400  | 2.26364500  |
| H | 5.12638600  | 4.07184300  | 3.80082700  | C            | 0.11966100  | 3.30510300  | 1.16304700  |
| H | -3.56160400 | 5.55703200  | 6.06610700  | C            | -0.93386300 | 2.90610100  | 3.01707700  |
| H | -2.10362100 | -0.70380200 | 4.25124900  | N            | -0.26814100 | 3.85213000  | 2.37144100  |
| H | -0.30049800 | 0.00064400  | 0.36107200  | C            | -3.07777300 | -0.50146700 | 4.64513100  |
| H | 4.79100800  | 0.45040900  | 0.97415800  | C            | -3.05108100 | -0.08857800 | 6.11843000  |
| H | 6.95066800  | 2.23551100  | -2.15423600 | C            | -2.72490100 | 1.39377800  | 6.37373500  |
| H | 9.52475200  | 0.51318300  | 3.16130900  | O            | -2.84417800 | 2.17248900  | 5.36274300  |
| H | 6.98178600  | 10.85915800 | 5.02427500  | O            | -2.42075400 | 1.71437700  | 7.54184400  |
| H | 4.23033800  | 11.53011400 | 1.76577800  | C            | 6.70678800  | 3.27730000  | -2.17074200 |
| H | -0.70683700 | 10.72934000 | 3.52656700  | C            | 6.19940600  | 3.89128000  | -0.89910900 |
| H | -3.52139200 | 10.00487200 | 0.50174100  | N            | 6.96902100  | 4.70204600  | -0.07901900 |

|    |             |             |             |   |             |             |             |
|----|-------------|-------------|-------------|---|-------------|-------------|-------------|
| C  | 4.9385200   | 3.93389400  | -0.35446800 | O | -1.59712100 | 4.19305600  | 8.27637600  |
| C  | 6.18163100  | 5.20010200  | 0.89325900  | O | 6.21065800  | 1.88748500  | 5.85027900  |
| N  | 4.93516800  | 4.75600000  | 0.75700900  | O | 9.41605600  | 5.73714800  | 0.61316200  |
| C  | 3.73564700  | 0.46694400  | 1.14588200  | O | 7.96224400  | 7.14961400  | 2.62702800  |
| C  | 3.37889500  | 0.77130200  | 2.60063100  | H | 0.90932500  | 1.02457600  | -0.37525500 |
| C  | 3.51546000  | 2.24318100  | 2.98708800  | H | -0.78857500 | 1.15543100  | -0.85229600 |
| O  | 3.16872100  | 3.09126500  | 2.07953700  | H | 0.72809700  | 3.87294700  | 0.47954200  |
| O  | 3.89146100  | 2.52947200  | 4.14181800  | H | -1.38362200 | 2.95422200  | 3.99669500  |
| C  | -3.34288400 | 9.06298900  | 0.02592700  | H | -3.65933400 | -1.42116500 | 4.50339900  |
| C  | -2.70168900 | 8.10883000  | 0.98168700  | H | -3.54265400 | 0.29115400  | 4.05317700  |
| N  | -3.27180900 | 7.75650400  | 2.19832600  | H | -2.35377500 | -0.69512800 | 6.70479600  |
| C  | -1.50058400 | 7.45018600  | 0.96007200  | H | -4.03997600 | -0.25794800 | 6.56556000  |
| C  | -2.42436500 | 6.92927500  | 2.85618200  | H | 7.60550800  | 3.80680800  | -2.50492600 |
| N  | -1.34223300 | 6.72455700  | 2.12431400  | H | 5.95837000  | 3.40469800  | -2.96099000 |
| C  | 0.35517100  | 10.64329100 | 3.42696100  | H | 4.04105900  | 3.43318000  | -0.68365400 |
| C  | 0.97168900  | 9.83787500  | 4.58046200  | H | 6.55659900  | 5.88282300  | 1.64992900  |
| C  | 0.54615500  | 8.37805600  | 4.54548300  | H | 3.35184100  | -0.51758700 | 0.85042500  |
| O  | 0.93210800  | 7.72028300  | 3.49988400  | H | 3.29284300  | 1.21868900  | 0.48865800  |
| O  | -0.14686200 | 7.90565900  | 5.46964200  | H | 3.97234100  | 0.17851700  | 3.30174500  |
| C  | 8.83479600  | 1.30884900  | 3.35407200  | H | 2.32612600  | 0.51366000  | 2.78152500  |
| C  | 9.67048400  | 2.56234100  | 3.64961400  | H | -4.29828800 | 8.68645600  | -0.35939200 |
| C  | 8.86094500  | 3.84286400  | 3.86436000  | H | -2.68166000 | 9.23111200  | -0.82686600 |
| O  | 9.19738900  | 4.85406400  | 3.18560400  | H | -0.73357100 | 7.45966800  | 0.20062200  |
| O  | 7.93744800  | 3.80517700  | 4.72797100  | H | -2.61769800 | 6.53862100  | 3.84427500  |
| C  | 4.05797400  | 10.72609300 | 1.08084600  | H | 0.76583500  | 11.65907800 | 3.40033200  |
| C  | 4.17258800  | 9.37312500  | 1.70100700  | H | 0.57841500  | 10.16078800 | 2.47118700  |
| N  | 4.91881300  | 9.06854900  | 2.83115800  | H | 0.68979700  | 10.25592200 | 5.55000600  |
| C  | 3.63183900  | 8.17761000  | 1.30955200  | H | 2.06387400  | 9.85664100  | 4.50315800  |
| C  | 4.80561200  | 7.74440000  | 3.08016700  | H | 8.17387400  | 1.05224000  | 4.18548700  |
| N  | 4.03776700  | 7.17798800  | 2.16632200  | H | 8.21686400  | 1.44928300  | 2.45968800  |
| C  | 8.01606900  | 10.58506100 | 5.01120700  | H | 10.25087000 | 2.39219900  | 4.56698500  |
| C  | 8.33382800  | 9.64539200  | 6.16909700  | H | 10.38941400 | 2.73957400  | 2.84354700  |
| C  | 7.54444700  | 8.32864400  | 6.12191100  | H | 3.05809700  | 10.86044700 | 0.65780700  |
| O  | 6.92120400  | 8.04339500  | 5.06216600  | H | 4.77659400  | 10.85545900 | 0.26039100  |
| O  | 7.60274600  | 7.61812600  | 7.16913400  | H | 2.95440300  | 7.97370900  | 0.49466300  |
| C  | -4.35862600 | 9.22911700  | 6.55004000  | H | 5.30058700  | 7.27345400  | 3.91359800  |
| C  | -4.98297500 | 8.05140300  | 7.31488700  | H | 8.60799500  | 11.50713200 | 5.06723600  |
| C  | -4.18761100 | 6.76184400  | 7.19712100  | H | 8.22937800  | 10.10298800 | 4.05304900  |
| O  | -3.82016300 | 6.12630500  | 8.17492900  | H | 8.14003900  | 10.11934900 | 7.13806200  |
| O  | -3.95575600 | 6.41191500  | 5.93592800  | H | 9.40020500  | 9.38399800  | 6.17341100  |
| Fe | 3.36056800  | 5.13337600  | 2.15679900  | H | -3.33336300 | 9.41610000  | 6.88307900  |
| Fe | 0.46606600  | 5.86961400  | 2.88727000  | H | -4.32486800 | 9.02250200  | 5.47692200  |
| O  | 0.01482300  | 5.44300700  | 4.80394600  | H | -5.07011000 | 8.27779600  | 8.38013600  |
| O  | -2.22646500 | 4.56610700  | 5.77695600  | H | -5.99429500 | 7.85933800  | 6.93233100  |

|   |             |             |             |                      |             |             |             |
|---|-------------|-------------|-------------|----------------------|-------------|-------------|-------------|
| H | -0.82928000 | 4.98357100  | 5.09053900  | H                    | 7.01105700  | 4.61271700  | 7.56558100  |
| H | -0.01711600 | 6.35544500  | 5.24908800  | H                    | 7.24145900  | 4.79934600  | 5.92903900  |
| H | -2.55409100 | 3.58958700  | 5.61488300  | H                    | 1.44009000  | 4.23983400  | 10.69127500 |
| H | -1.87425400 | 4.51282200  | 6.72252200  | H                    | 3.01783800  | 6.27322600  | 5.28753700  |
| H | -2.37140500 | 4.70114900  | 8.57263600  | H                    | 7.06573100  | 6.21643500  | 6.92925700  |
| H | -1.90365800 | 3.25661100  | 8.14553000  | H                    | -4.16370100 | 8.06377700  | 2.55683700  |
| H | 5.42718400  | 1.95461500  | 5.27886700  | H                    | 5.51130200  | 9.67109500  | 3.38563300  |
| H | 6.86548200  | 2.46717600  | 5.41456000  | H                    | 7.97934400  | 4.94839900  | -0.08767600 |
| H | 9.04384700  | 6.55164500  | 1.00146000  | H                    | -1.44490300 | 0.93146000  | 2.55816400  |
| H | 9.56390800  | 5.21523300  | 1.43453500  | $T_{S_{CE1-\alpha}}$ |             |             |             |
| H | 7.65490300  | 7.65387500  | 3.40564800  | C                    | -0.11698600 | 0.99112500  | -0.00015000 |
| H | 8.34278200  | 6.32846900  | 3.02635500  | C                    | -0.20666300 | 1.99910400  | 1.11592000  |
| O | 3.37706500  | 5.15562300  | 4.00402500  | N                    | -0.88278600 | 1.76502000  | 2.30615300  |
| H | 3.53968300  | 4.22965600  | 4.30789700  | C                    | 0.28129400  | 3.27542200  | 1.25618300  |
| H | -3.31682700 | 5.59862600  | 5.90337100  | C                    | -0.77861200 | 2.86301900  | 3.09635700  |
| H | -2.10362000 | -0.70380500 | 4.25124900  | N                    | -0.07838900 | 3.80514000  | 2.48307000  |
| H | -0.30050000 | 0.00064800  | 0.36106900  | C                    | -3.07783000 | -0.50157100 | 4.64513600  |
| H | 4.79101400  | 0.45039300  | 0.97415300  | C                    | -3.09534100 | -0.22826000 | 6.14936800  |
| H | 6.95065800  | 2.23550400  | -2.15423400 | C                    | -2.99270400 | 1.25669200  | 6.52667500  |
| H | 9.52475900  | 0.51319200  | 3.16129700  | O                    | -2.69289400 | 2.06023600  | 5.57580900  |
| H | 6.98179000  | 10.85915300 | 5.02427000  | O                    | -3.22801300 | 1.54828900  | 7.71795600  |
| H | 4.23033200  | 11.53010800 | 1.76578000  | C                    | 6.70671500  | 3.27727400  | -2.17077500 |
| H | -0.70684300 | 10.72934200 | 3.52656800  | C                    | 6.21062000  | 3.93940600  | -0.92297400 |
| H | -3.52138600 | 10.00488000 | 0.50174200  | N                    | 6.97714400  | 4.83021800  | -0.18533500 |
| H | -4.93703600 | 10.11434200 | 6.71461200  | C                    | 4.95999700  | 3.99734000  | -0.35549700 |
| O | 1.69313100  | 5.67021300  | 1.61919700  | C                    | 6.20247000  | 5.37173900  | 0.77006900  |
| O | 2.88825800  | 6.82700700  | 6.09040000  | N                    | 4.96169200  | 4.89383400  | 0.69597000  |
| C | 2.11880400  | 4.78008600  | 10.02171200 | C                    | 3.73563300  | 0.46702600  | 1.14584100  |
| N | 1.35612800  | 5.74244600  | 9.24620400  | C                    | 3.44148000  | 0.80184900  | 2.61412400  |
| C | 2.11057900  | 6.61496800  | 8.35316900  | C                    | 4.03461400  | 2.16415700  | 2.93735200  |
| C | 2.96992000  | 5.97406500  | 7.22657200  | O                    | 3.44461600  | 3.14659000  | 2.32050200  |
| C | 4.45110500  | 5.79108800  | 7.63102400  | O                    | 5.03159000  | 2.26390000  | 3.66701400  |
| C | 5.26347200  | 5.09773800  | 6.53861500  | C                    | -3.34290500 | 9.06301900  | 0.02592200  |
| N | 6.73857900  | 5.18384300  | 6.76594900  | C                    | -2.73377800 | 8.09480500  | 0.99760900  |
| H | 2.85026600  | 5.30976900  | 10.64749400 | N                    | -3.35199800 | 7.74159100  | 2.18831600  |
| H | 2.67510300  | 4.02259500  | 9.43952400  | C                    | -1.53594900 | 7.42298700  | 1.02855500  |
| H | 0.59828100  | 5.27526100  | 8.75307500  | C                    | -2.53140200 | 6.90379300  | 2.87399600  |
| H | 1.39250100  | 7.26415800  | 7.84306800  | N                    | -1.41918500 | 6.68787500  | 2.19452800  |
| H | 2.75119100  | 7.26446100  | 8.96965600  | C                    | 0.35514700  | 10.64327400 | 3.42698800  |
| H | 2.53342400  | 4.98951300  | 6.98828400  | C                    | 0.98475800  | 9.94276600  | 4.63240500  |
| H | 4.51908700  | 5.22782100  | 8.57143200  | C                    | 0.53927900  | 8.48594900  | 4.70030600  |
| H | 4.87138700  | 6.78811200  | 7.81196000  | O                    | 0.77053300  | 7.79534500  | 3.64816700  |
| H | 5.08097300  | 5.57829400  | 5.57963200  | O                    | -0.02806600 | 8.08081100  | 5.74499400  |
| H | 5.02065700  | 4.03651400  | 6.44115400  | C                    | 8.83487100  | 1.30890600  | 3.35410600  |

|    |             |             |             |   |             |             |             |
|----|-------------|-------------|-------------|---|-------------|-------------|-------------|
| C  | 9.66565400  | 2.58896300  | 3.53745300  | H | -4.29320600 | 8.69827400  | -0.38292400 |
| C  | 8.86475900  | 3.82612800  | 3.95159400  | H | -2.66026500 | 9.22768600  | -0.81086900 |
| O  | 8.96456200  | 4.85707900  | 3.23396800  | H | -0.74663500 | 7.43898400  | 0.29109400  |
| O  | 8.18673400  | 3.72446200  | 5.01945500  | H | -2.76922400 | 6.52297700  | 3.85584000  |
| C  | 4.05793300  | 10.72610100 | 1.08084800  | H | 0.75387600  | 11.65798000 | 3.30467700  |
| C  | 4.06682100  | 9.37398300  | 1.73735200  | H | 0.57110500  | 10.07722400 | 2.51746000  |
| N  | 4.71890400  | 9.09357600  | 2.92977900  | H | 0.72164400  | 10.43894200 | 5.57023000  |
| C  | 3.53569400  | 8.16726000  | 1.34657500  | H | 2.07679800  | 9.95529000  | 4.53300100  |
| C  | 4.57312400  | 7.78348200  | 3.20975000  | H | 8.25197400  | 1.07448100  | 4.24752500  |
| N  | 3.85999200  | 7.18500300  | 2.26621500  | H | 8.14394500  | 1.39606800  | 2.50888100  |
| C  | 8.01612900  | 10.58506600 | 5.01125600  | H | 10.40457600 | 2.41452200  | 4.33153400  |
| C  | 8.27429000  | 9.60578100  | 6.15230600  | H | 10.22200000 | 2.81777400  | 2.62287000  |
| C  | 7.32642900  | 8.39684500  | 6.11411500  | H | 3.09452400  | 10.90440300 | 0.59434500  |
| O  | 6.57845300  | 8.26870300  | 5.10345400  | H | 4.83279500  | 10.79603500 | 0.30678400  |
| O  | 7.37931400  | 7.61518700  | 7.10601600  | H | 2.94442700  | 7.95075300  | 0.46916600  |
| C  | -4.35862100 | 9.22912000  | 6.55005700  | H | 5.04648600  | 7.32213100  | 4.06202400  |
| C  | -5.35675600 | 8.07059100  | 6.78251600  | H | 8.62541900  | 11.49227800 | 5.10266500  |
| C  | -4.72782000 | 6.69827300  | 6.90356700  | H | 8.23181000  | 10.11998800 | 4.04519600  |
| O  | -4.75313200 | 6.06330900  | 7.95020500  | H | 8.16228800  | 10.08887800 | 7.13045400  |
| O  | -4.16343900 | 6.28048300  | 5.77929600  | H | 9.30168100  | 9.22149500  | 6.12515000  |
| Fe | 3.90644200  | 5.03132000  | 2.58401600  | H | -3.53445900 | 9.20171700  | 7.26742900  |
| Fe | 0.35968100  | 5.79012200  | 3.35532600  | H | -3.93974500 | 9.22358000  | 5.54144800  |
| O  | -0.60628400 | 5.67707500  | 5.12878500  | H | -5.91019500 | 8.24352700  | 7.70885400  |
| O  | -2.54942900 | 4.44221700  | 6.27124500  | H | -6.08204000 | 8.04980400  | 5.95886000  |
| O  | -2.88985000 | 3.98648200  | 8.83255100  | H | -1.34776200 | 5.16920400  | 5.56819900  |
| O  | 6.62374300  | 1.63180800  | 6.05999700  | H | -0.46639500 | 6.58831800  | 5.54553800  |
| O  | 9.38372800  | 5.79623200  | 0.71268900  | H | -2.66231900 | 3.44427400  | 5.97601600  |
| O  | 7.88420000  | 7.29064200  | 2.72753300  | H | -2.49918600 | 4.38962100  | 7.27197900  |
| H  | 0.87836100  | 1.00691900  | -0.45145100 | H | -3.70249600 | 4.51563300  | 8.76683600  |
| H  | -0.84810200 | 1.19370800  | -0.79248100 | H | -3.11027400 | 3.07132900  | 8.52129400  |
| H  | 0.88990500  | 3.83222600  | 0.55951600  | H | 5.98883300  | 1.64000900  | 5.32506200  |
| H  | -1.21818900 | 2.90157300  | 4.08353600  | H | 7.28991500  | 2.27890200  | 5.75383300  |
| H  | -3.68198300 | -1.38552800 | 4.40217700  | H | 9.03889300  | 6.63446000  | 1.06832000  |
| H  | -3.49942300 | 0.35122700  | 4.10720900  | H | 9.41738900  | 5.26151700  | 1.54175600  |
| H  | -2.28913500 | -0.76105400 | 6.66780900  | H | 7.43318800  | 7.74144700  | 3.46651100  |
| H  | -4.02407300 | -0.59537000 | 6.59963400  | H | 8.17291500  | 6.43646400  | 3.12330400  |
| H  | 7.60557300  | 3.79548900  | -2.52319300 | O | 5.38671300  | 4.98367200  | 3.61298300  |
| H  | 5.95973200  | 3.39431600  | -2.96524300 | H | 5.64498700  | 4.04166100  | 3.72720100  |
| H  | 4.06797000  | 3.45662600  | -0.63402600 | H | -3.58909200 | 5.42979600  | 5.97658600  |
| H  | 6.57997900  | 6.06895900  | 1.51153400  | H | -2.10359800 | -0.70372000 | 4.25124300  |
| H  | 3.33007600  | -0.51365800 | 0.87180400  | H | -0.30051100 | 0.00065800  | 0.36106300  |
| H  | 3.29280800  | 1.22127700  | 0.49020000  | H | 4.79102300  | 0.45036800  | 0.97418700  |
| H  | 3.88313500  | 0.05703900  | 3.28099500  | H | 6.95071900  | 2.23552100  | -2.15423900 |
| H  | 2.36069000  | 0.83699500  | 2.78580600  | H | 9.52470600  | 0.51316300  | 3.16129100  |

|                           |             |             |             |   |             |             |             |
|---------------------------|-------------|-------------|-------------|---|-------------|-------------|-------------|
| H                         | 6.98174900  | 10.85914900 | 5.02422200  | O | -3.91654600 | 1.49583000  | 7.63605600  |
| H                         | 4.23036900  | 11.53006800 | 1.76576700  | C | 6.70670700  | 3.27726900  | -2.17078700 |
| H                         | -0.70681500 | 10.72934400 | 3.52655000  | C | 6.18979000  | 3.92829700  | -0.92994300 |
| H                         | -3.52136200 | 10.00486100 | 0.50173900  | N | 6.95678800  | 4.74444900  | -0.11375600 |
| H                         | -4.93703700 | 10.11434200 | 6.71460200  | C | 4.91143300  | 4.03974400  | -0.43602100 |
| O                         | 2.32357000  | 4.32532100  | 4.76683500  | C | 6.14536700  | 5.29545500  | 0.81215600  |
| O                         | 2.32286500  | 5.34450000  | 3.76829700  | N | 4.88999600  | 4.89084500  | 0.64742400  |
| C                         | 0.52645400  | 4.34120400  | 9.14592400  | C | 3.73563000  | 0.46705000  | 1.14584600  |
| N                         | 0.51693700  | 5.32820300  | 8.07634800  | C | 3.39294200  | 0.71486100  | 2.61582300  |
| C                         | 1.79404000  | 5.92627800  | 7.73805000  | C | 3.74161600  | 2.14468100  | 3.03753100  |
| C                         | 2.88112000  | 5.01363200  | 7.17403900  | O | 3.27312900  | 3.05460500  | 2.25730700  |
| C                         | 4.30318100  | 5.51341300  | 7.34597200  | O | 4.43321200  | 2.33820600  | 4.05535100  |
| C                         | 5.32084000  | 4.62789400  | 6.63922100  | C | -3.34291100 | 9.06300600  | 0.02592800  |
| N                         | 6.72990100  | 5.10117200  | 6.81201700  | C | -2.81730400 | 8.07484100  | 1.02317800  |
| H                         | 0.89808700  | 4.81183600  | 10.06613200 | N | -3.46297400 | 7.81681700  | 2.22420100  |
| H                         | 1.14917100  | 3.44508500  | 8.96491300  | C | -1.68575300 | 7.29859200  | 1.07259900  |
| H                         | 0.07197200  | 4.96471700  | 7.24062800  | C | -2.71875800 | 6.93361000  | 2.93909100  |
| H                         | 1.60966300  | 6.76077200  | 7.05054800  | N | -1.63450400 | 6.59663500  | 2.26261600  |
| H                         | 2.19993400  | 6.38719800  | 8.65647500  | C | 0.35515300  | 10.64328300 | 3.42698000  |
| H                         | 2.76868300  | 3.96045300  | 7.45782500  | C | 0.93204000  | 9.79588500  | 4.57125900  |
| H                         | 4.51332600  | 5.56020200  | 8.42935600  | C | 0.29012500  | 8.41607200  | 4.62738200  |
| H                         | 4.39870300  | 6.54359900  | 6.97896700  | O | 0.51963300  | 7.66697400  | 3.59032100  |
| H                         | 5.12775900  | 4.65906000  | 5.57081200  | O | -0.41454200 | 8.09151700  | 5.60039100  |
| H                         | 5.28212000  | 3.58347600  | 6.95964700  | C | 8.83485400  | 1.30892600  | 3.35409300  |
| H                         | 7.12379100  | 4.75539200  | 7.68658900  | C | 9.67934500  | 2.51412200  | 3.81026400  |
| H                         | 7.32761900  | 4.71083000  | 6.02917200  | C | 8.87620100  | 3.74867400  | 4.23598700  |
| H                         | -0.50086400 | 4.01525900  | 9.32785800  | O | 8.95267100  | 4.77495500  | 3.51312800  |
| H                         | 2.60121100  | 4.81580500  | 5.82609800  | O | 8.21603900  | 3.63787100  | 5.31798500  |
| H                         | 6.85376100  | 6.18143900  | 6.84106800  | C | 4.05792500  | 10.72609100 | 1.08083300  |
| H                         | -4.25512900 | 8.05225900  | 2.51316400  | C | 3.98466200  | 9.39315800  | 1.76531100  |
| H                         | 5.32124400  | 9.68138700  | 3.49231800  | N | 4.62584500  | 9.09108200  | 2.95816000  |
| H                         | 7.99109200  | 5.04772500  | -0.17790100 | C | 3.37544800  | 8.21570000  | 1.39848500  |
| H                         | -1.37734300 | 0.92619800  | 2.57520600  | C | 4.39578400  | 7.79063300  | 3.25303600  |
| <b>TS<sub>CE1-β</sub></b> |             |             |             | N | 3.64044200  | 7.22552600  | 2.32432200  |
| C                         | -0.11696900 | 0.99113600  | -0.00014100 | C | 8.01612500  | 10.58504500 | 5.01126300  |
| C                         | -0.40344900 | 2.06536400  | 1.01117400  | C | 8.24813100  | 9.60437000  | 6.15759000  |
| N                         | -1.63641500 | 2.23269400  | 1.63309100  | C | 7.23080300  | 8.44780800  | 6.15228300  |
| C                         | 0.36909100  | 3.09335200  | 1.49386100  | O | 6.45337800  | 8.35182400  | 5.16344900  |
| C                         | -1.56860200 | 3.31774000  | 2.44351700  | O | 7.27150400  | 7.67942800  | 7.15775600  |
| N                         | -0.36848400 | 3.87064600  | 2.37555600  | C | -4.35862400 | 9.22912300  | 6.55005700  |
| C                         | -3.07782200 | -0.50156000 | 4.64513000  | C | -5.30062400 | 8.10349800  | 7.03438200  |
| C                         | -3.79666400 | -0.22849200 | 5.96404700  | C | -4.67766100 | 6.73479000  | 7.16246900  |
| C                         | -3.63390000 | 1.18957300  | 6.48374000  | O | -4.64415800 | 6.12839100  | 8.22522300  |
| O                         | -3.18183800 | 2.02318900  | 5.56155600  | O | -4.19412900 | 6.26988900  | 6.01660600  |

|    |             |             |             |   |             |             |             |
|----|-------------|-------------|-------------|---|-------------|-------------|-------------|
| Fe | 3.79814900  | 5.04255500  | 2.54589700  | H | -3.43881000 | 9.27775900  | 7.13733300  |
| Fe | 0.12134100  | 5.74542900  | 3.51075400  | H | -4.09281200 | 9.13001900  | 5.49581000  |
| O  | -0.91930900 | 5.53992500  | 5.03466000  | H | -5.70309600 | 8.35523200  | 8.01844900  |
| O  | -2.62754100 | 4.31381700  | 6.44321400  | H | -6.14906900 | 8.02527400  | 6.34173300  |
| O  | -3.03027200 | 3.88895200  | 8.96684700  | H | -1.82657200 | 4.71461300  | 5.96811600  |
| O  | 6.48718800  | 1.43689700  | 5.89828700  | H | -0.83144000 | 6.44632900  | 5.45007900  |
| O  | 9.34737700  | 5.66228200  | 0.93981400  | H | -2.99402400 | 2.95482500  | 5.95247100  |
| O  | 7.92540100  | 7.23826100  | 2.90054800  | H | -2.48004300 | 4.21461100  | 7.43395900  |
| H  | 0.93666400  | 1.04660800  | -0.28206500 | H | -3.72769800 | 4.56698000  | 8.90071300  |
| H  | -0.71257600 | 1.13050900  | -0.91156200 | H | -3.44777200 | 3.04810900  | 8.69954300  |
| H  | 1.42746800  | 3.25739600  | 1.34370200  | H | 5.79140000  | 1.60711300  | 5.23797600  |
| H  | -2.38580100 | 3.65164900  | 3.06354800  | H | 7.15359500  | 2.12782800  | 5.71017100  |
| H  | -3.28930400 | -1.51996700 | 4.29959100  | H | 8.96808000  | 6.49254200  | 1.28133700  |
| H  | -3.40865600 | 0.19562500  | 3.87154300  | H | 9.37117200  | 5.13685300  | 1.77306700  |
| H  | -3.45951200 | -0.90118600 | 6.75895600  | H | 7.34929500  | 7.67835800  | 3.55176000  |
| H  | -4.87520900 | -0.40742300 | 5.85996400  | H | 8.14643500  | 6.38317700  | 3.33032500  |
| H  | 7.60977000  | 3.79700800  | -2.51227200 | O | 5.30467900  | 5.08311600  | 3.62599600  |
| H  | 5.96921500  | 3.39429100  | -2.97450700 | H | 5.52056100  | 4.15476000  | 3.80834500  |
| H  | 4.01212700  | 3.56169300  | -0.79819500 | H | -3.64832500 | 5.42334300  | 6.20428600  |
| H  | 6.50782400  | 5.93654700  | 1.60622400  | H | -1.99060200 | -0.40388800 | 4.73520100  |
| H  | 3.33757700  | -0.49647400 | 0.80076700  | H | -0.30052700 | 0.00064800  | 0.36106100  |
| H  | 3.31177000  | 1.26035400  | 0.52527400  | H | 4.79103100  | 0.45034900  | 0.97418600  |
| H  | 3.91226500  | 0.01302600  | 3.27378200  | H | 6.95072900  | 2.23552200  | -2.15423200 |
| H  | 2.31322900  | 0.57950900  | 2.76724800  | H | 9.52472200  | 0.51315000  | 3.16130200  |
| H  | -4.27967800 | 8.72933000  | -0.43748300 | H | 6.98174900  | 10.85916300 | 5.02421800  |
| H  | -2.61086200 | 9.21504800  | -0.77012500 | H | 4.23037700  | 11.53007500 | 1.76578100  |
| H  | -0.89804400 | 7.22035900  | 0.33768900  | H | -0.70682000 | 10.72934000 | 3.52655400  |
| H  | -2.97086000 | 6.60691500  | 3.93758000  | H | -3.52135400 | 10.00487200 | 0.50173100  |
| H  | 0.78456400  | 11.65070600 | 3.43039800  | H | -4.93703300 | 10.11433900 | 6.71460200  |
| H  | 0.57745600  | 10.17698000 | 2.46351300  | O | 1.91325500  | 5.10208500  | 3.71838300  |
| H  | 0.76822700  | 10.28240500 | 5.53645900  | O | 2.19375300  | 5.83109700  | 4.90995600  |
| H  | 2.00889200  | 9.66019100  | 4.42645000  | C | 0.57193300  | 2.34413200  | 6.80195600  |
| H  | 8.12564800  | 0.99860200  | 4.12550500  | N | 0.50285100  | 3.75823600  | 7.15154900  |
| H  | 8.28074600  | 1.53297400  | 2.43612100  | C | 1.72046800  | 4.31171600  | 7.73462500  |
| H  | 10.27803700 | 2.20698500  | 4.67751200  | C | 2.95519000  | 4.32423000  | 6.85278200  |
| H  | 10.37271000 | 2.80511600  | 3.01421800  | C | 4.20851300  | 4.96322800  | 7.42604300  |
| H  | 3.12598800  | 10.93298800 | 0.54602000  | C | 5.40531600  | 4.56042300  | 6.57602000  |
| H  | 4.87102400  | 10.75680800 | 0.34346500  | N | 6.72214900  | 5.13384200  | 6.97777400  |
| H  | 2.76942200  | 8.02705000  | 0.52338400  | H | 0.73039700  | 1.75079300  | 7.71148700  |
| H  | 4.84788400  | 7.30250300  | 4.10141600  | H | 1.36208000  | 2.06770800  | 6.08370200  |
| H  | 8.63542600  | 11.48578400 | 5.10055200  | H | 0.25168100  | 4.31033000  | 6.33458200  |
| H  | 8.22680600  | 10.10877600 | 4.04954500  | H | 1.50089700  | 5.33344700  | 8.07398500  |
| H  | 8.18284000  | 10.10238200 | 7.13293900  | H | 1.95151000  | 3.73808800  | 8.65063600  |
| H  | 9.25104300  | 9.16187900  | 6.11317300  | H | 3.14932000  | 3.38896000  | 6.31782900  |

|                     |             |             |             |    |             |             |             |
|---------------------|-------------|-------------|-------------|----|-------------|-------------|-------------|
| H                   | 4.33171400  | 4.62871600  | 8.47285100  | C  | 0.41989000  | 8.41967700  | 4.69063100  |
| H                   | 4.10574300  | 6.05667300  | 7.47018200  | O  | 0.16113300  | 7.84026000  | 3.58307400  |
| H                   | 5.24860000  | 4.89297300  | 5.54744000  | O  | 0.29616600  | 7.90000200  | 5.83221800  |
| H                   | 5.52185500  | 3.47358400  | 6.57019700  | C  | 8.83486500  | 1.30892100  | 3.35409500  |
| H                   | 7.00804600  | 4.81276500  | 7.90300200  | C  | 9.61781600  | 2.61146400  | 3.14474800  |
| H                   | 7.41920900  | 4.74226600  | 6.27797200  | C  | 8.88581400  | 3.92677900  | 3.44132000  |
| H                   | -0.38899100 | 2.03959200  | 6.37382800  | O  | 9.24274100  | 4.92252800  | 2.73665800  |
| H                   | 2.56622800  | 5.07268800  | 5.72384800  | O  | 8.04483500  | 3.96449600  | 4.37246400  |
| H                   | 6.78693500  | 6.21862500  | 6.97853400  | C  | 4.05792700  | 10.72608700 | 1.08082600  |
| H                   | -4.32837000 | 8.22991600  | 2.53731400  | C  | 4.17866900  | 9.37112400  | 1.71171900  |
| H                   | 5.28059000  | 9.63536900  | 3.50709700  | N  | 5.00970700  | 9.08658000  | 2.78518600  |
| H                   | 7.97348000  | 4.91702800  | -0.04861000 | C  | 3.61404900  | 8.16131600  | 1.38574800  |
| H                   | -2.43315300 | 1.61922100  | 1.55334700  | C  | 4.93157800  | 7.76805300  | 3.06056800  |
| Int E1 <sub>α</sub> |             |             |             | N  | 4.09423400  | 7.17328300  | 2.22622300  |
| C                   | -0.11697600 | 0.99113600  | -0.00014200 | C  | 8.01613100  | 10.58505400 | 5.01126600  |
| C                   | -0.32481500 | 1.98662800  | 1.10279700  | C  | 8.36351700  | 9.64365100  | 6.16142600  |
| N                   | -1.12746800 | 1.73496400  | 2.20611900  | C  | 7.64011400  | 8.29047600  | 6.08786800  |
| C                   | 0.14068100  | 3.26029400  | 1.30856600  | O  | 6.95426100  | 8.05259400  | 5.04926100  |
| C                   | -1.11763000 | 2.82343700  | 3.01607000  | O  | 7.79151100  | 7.51529400  | 7.07378600  |
| N                   | -0.35793800 | 3.77302000  | 2.49201300  | C  | -4.35862700 | 9.22912200  | 6.55006200  |
| C                   | -3.07782800 | -0.50156900 | 4.64513400  | C  | -5.26697000 | 8.01903800  | 6.85203000  |
| C                   | -3.77122500 | -0.07813400 | 5.93762300  | C  | -4.51643800 | 6.71234900  | 7.04033900  |
| C                   | -3.49987400 | 1.37392100  | 6.37053500  | O  | -4.53707800 | 6.10920900  | 8.10603500  |
| O                   | -3.01884000 | 2.15509200  | 5.47773900  | O  | -3.85306100 | 6.32365600  | 5.96267200  |
| O                   | -3.79070300 | 1.66578400  | 7.54988100  | Fe | 3.85885000  | 5.02834200  | 2.55175600  |
| C                   | 6.70669600  | 3.27727400  | -2.17078300 | Fe | 0.01286100  | 5.78481300  | 3.29172800  |
| C                   | 6.23507700  | 3.91103300  | -0.90022000 | O  | -0.10183200 | 5.39969200  | 5.32949000  |
| N                   | 7.00744100  | 4.80814100  | -0.18146200 | O  | -2.29270000 | 4.40630200  | 6.37361600  |
| C                   | 5.01682900  | 3.89981200  | -0.26474300 | O  | -2.86679400 | 3.86799000  | 8.85174400  |
| C                   | 6.27036000  | 5.29493900  | 0.83023800  | O  | 6.74544900  | 2.52520400  | 6.20621000  |
| N                   | 5.04583000  | 4.77017200  | 0.80835000  | O  | 9.45910700  | 5.90328300  | 0.27809500  |
| C                   | 3.73563500  | 0.46704800  | 1.14584400  | O  | 8.07575100  | 7.30766300  | 2.51068300  |
| C                   | 3.40256100  | 0.73657000  | 2.61818000  | H  | 0.90951100  | 1.03395800  | -0.37223800 |
| C                   | 3.87743800  | 2.11768900  | 3.05767600  | H  | -0.79152600 | 1.16694700  | -0.84724900 |
| O                   | 3.39278400  | 3.09444100  | 2.35211800  | H  | 0.82572300  | 3.82468200  | 0.69420800  |
| O                   | 4.67063800  | 2.22922500  | 4.00658900  | H  | -1.66579300 | 2.84362500  | 3.94923200  |
| C                   | -3.34290700 | 9.06301400  | 0.02592600  | H  | -3.30436000 | -1.54353300 | 4.38878400  |
| C                   | -2.90089500 | 8.03446200  | 1.01326500  | H  | -3.40624400 | 0.13517200  | 3.81632100  |
| N                   | -3.62215300 | 7.71818100  | 2.15463500  | H  | -3.48001000 | -0.72421700 | 6.77245200  |
| C                   | -1.78128400 | 7.24956300  | 1.08863500  | H  | -4.85944600 | -0.19039500 | 5.83963600  |
| C                   | -2.92979200 | 6.78989600  | 2.86389800  | H  | 7.59970800  | 3.79952500  | -2.53040700 |
| N                   | -1.80770400 | 6.48335600  | 2.23754800  | H  | 5.94529000  | 3.39764800  | -2.95076300 |
| C                   | 0.35515100  | 10.64328000 | 3.42699300  | H  | 4.13244800  | 3.32926800  | -0.50320400 |
| C                   | 0.94200900  | 9.85256400  | 4.60000400  | H  | 6.66461400  | 6.00407200  | 1.55172100  |

|   |             |             |             |                                       |             |             |             |
|---|-------------|-------------|-------------|---------------------------------------|-------------|-------------|-------------|
| H | 3.33228900  | -0.50104400 | 0.82611100  | H                                     | -0.30052100 | 0.00064800  | 0.36106200  |
| H | 3.29968900  | 1.24576600  | 0.51501700  | H                                     | 4.79102600  | 0.45035000  | 0.97418700  |
| H | 3.86059100  | -0.00987000 | 3.27195500  | H                                     | 6.95073700  | 2.23551500  | -2.15423400 |
| H | 2.31583500  | 0.69643100  | 2.76067400  | H                                     | 9.52471200  | 0.51315300  | 3.16130100  |
| H | -4.26191500 | 8.76957000  | -0.49749000 | H                                     | 6.98174500  | 10.85915600 | 5.02421600  |
| H | -2.56550800 | 9.20831200  | -0.72770900 | H                                     | 4.23037700  | 11.53008000 | 1.76578600  |
| H | -0.94962800 | 7.20948200  | 0.40075100  | H                                     | -0.70681900 | 10.72934000 | 3.52654300  |
| H | -3.25996500 | 6.42277700  | 3.82631400  | H                                     | -3.52135900 | 10.00486700 | 0.50173200  |
| H | 0.77683600  | 11.65406900 | 3.38283100  | H                                     | -4.93703100 | 10.11434100 | 6.71459900  |
| H | 0.56476600  | 10.13276700 | 2.48432300  | O                                     | 2.01478300  | 5.41133900  | 3.21264000  |
| H | 0.75888400  | 10.34611600 | 5.55887300  | O                                     | 2.41172500  | 6.18470000  | 4.40128500  |
| H | 2.03202100  | 9.77544100  | 4.49028100  | C                                     | 0.99844800  | 8.35793500  | 9.47025200  |
| H | 8.45095400  | 1.22367500  | 4.37351200  | N                                     | 1.91502300  | 8.70069300  | 8.39257300  |
| H | 7.98824200  | 1.22758500  | 2.66460200  | C                                     | 3.27168400  | 8.19245300  | 8.57553500  |
| H | 10.50231500 | 2.60292200  | 3.79863900  | C                                     | 3.46999800  | 6.70407900  | 8.49798100  |
| H | 10.00506200 | 2.66200500  | 2.12139100  | C                                     | 4.81736200  | 6.11508600  | 8.20552300  |
| H | 3.05697500  | 10.85628800 | 0.65987400  | C                                     | 4.99022800  | 5.83194800  | 6.70147100  |
| H | 4.77662800  | 10.84826800 | 0.25985900  | N                                     | 6.36805100  | 5.37765300  | 6.36317200  |
| H | 2.89455300  | 7.94768800  | 0.60923400  | H                                     | 1.31963900  | 8.84766300  | 10.39990900 |
| H | 5.50195500  | 7.30319900  | 3.84723200  | H                                     | 0.90271400  | 7.27871300  | 9.68801000  |
| H | 8.60098600  | 11.51221700 | 5.06797300  | H                                     | 1.52647600  | 8.38440600  | 7.50354600  |
| H | 8.23374900  | 10.11047400 | 4.05006500  | H                                     | 3.92452800  | 8.67510000  | 7.82964200  |
| H | 8.13580000  | 10.09476700 | 7.13448300  | H                                     | 3.63853300  | 8.57285400  | 9.54828100  |
| H | 9.44104000  | 9.43606600  | 6.17676500  | H                                     | 2.60963400  | 6.04607600  | 8.59450000  |
| H | -3.49969700 | 9.25609000  | 7.22707500  | H                                     | 4.96609500  | 5.18169500  | 8.76734000  |
| H | -3.97717400 | 9.21319900  | 5.52618600  | H                                     | 5.61303800  | 6.80843500  | 8.50815600  |
| H | -5.82720200 | 8.18992900  | 7.77428600  | H                                     | 4.81774200  | 6.74195400  | 6.12695300  |
| H | -5.99475400 | 7.89142900  | 6.04009300  | H                                     | 4.28771100  | 5.07563900  | 6.34955100  |
| H | -0.87590400 | 4.94187900  | 5.76486300  | H                                     | 6.54874100  | 4.40669200  | 6.67381700  |
| H | -0.03242800 | 6.34454900  | 5.68562200  | H                                     | 6.47571300  | 5.33829200  | 5.33874000  |
| H | -2.63065300 | 3.49807600  | 6.00161300  | H                                     | -0.00054500 | 8.73121100  | 9.22368200  |
| H | -2.30778800 | 4.25555400  | 7.37210400  | H                                     | 2.04758000  | 5.61116400  | 5.10271900  |
| H | -3.57101300 | 4.53898100  | 8.80629700  | H                                     | 7.06411100  | 6.11524000  | 6.71197400  |
| H | -3.27274200 | 3.04083500  | 8.48711100  | H                                     | -4.50634700 | 8.11637200  | 2.43243300  |
| H | 5.98418000  | 2.23297300  | 5.68055500  | H                                     | 5.63760900  | 9.70238600  | 3.28383100  |
| H | 7.35550800  | 2.88448600  | 5.51557900  | H                                     | 8.00417500  | 5.10292400  | -0.27203300 |
| H | 9.12796800  | 6.72843300  | 0.67447800  | H                                     | -1.62091600 | 0.87970500  | 2.41879800  |
| H | 9.59571100  | 5.36439200  | 1.09820000  | TS <sub>EF1-<math>\alpha</math></sub> |             |             |             |
| H | 7.75780400  | 7.69277100  | 3.34921100  | C                                     | -0.11698000 | 0.99112900  | -0.00014300 |
| H | 8.47670600  | 6.44510400  | 2.79054100  | C                                     | -0.26437700 | 2.01464600  | 1.08615300  |
| O | 5.09939000  | 4.88778700  | 3.85100300  | N                                     | -1.08786300 | 1.85422700  | 2.19081300  |
| H | 5.23579500  | 3.92673500  | 4.02731400  | C                                     | 0.28725900  | 3.25968900  | 1.25171200  |
| H | -3.24902600 | 5.48416300  | 6.16418800  | C                                     | -1.00745200 | 2.96496100  | 2.96317000  |
| H | -1.99059800 | -0.40388000 | 4.73519800  | N                                     | -0.18219700 | 3.84375800  | 2.41299100  |



|   |             |             |             |    |             |             |             |
|---|-------------|-------------|-------------|----|-------------|-------------|-------------|
| C | -3.07782800 | -0.50157100 | 4.64513400  | C  | -5.25794800 | 8.05556000  | 6.98795800  |
| C | -3.77669600 | -0.06198600 | 5.92655700  | C  | -4.54748700 | 6.72042300  | 7.06320700  |
| C | -3.51340800 | 1.40189200  | 6.30630800  | O  | -4.46103300 | 6.09210400  | 8.11080000  |
| O | -3.09999000 | 2.16111300  | 5.35976000  | O  | -4.04776500 | 6.33191600  | 5.90031400  |
| O | -3.74107800 | 1.72731800  | 7.49033400  | Fe | 3.80819500  | 5.01773000  | 2.62234800  |
| C | 6.70669500  | 3.27726700  | -2.17078200 | Fe | 0.32550000  | 5.79467300  | 3.26045400  |
| C | 6.17502500  | 3.91779600  | -0.92233300 | O  | -0.20698600 | 5.44017300  | 5.27842900  |
| N | 6.92140600  | 4.80433500  | -0.16102600 | O  | -2.43965100 | 4.43588100  | 6.13763500  |
| C | 4.91808400  | 3.94828400  | -0.36208900 | O  | -2.68795500 | 3.90646400  | 8.67871400  |
| C | 6.12929400  | 5.31718700  | 0.79713400  | O  | 6.62685200  | 1.70703100  | 6.11170200  |
| N | 4.89554500  | 4.82577900  | 0.70620200  | O  | 9.33554300  | 5.81639400  | 0.66880600  |
| C | 3.73564000  | 0.46704900  | 1.14585000  | O  | 7.88155500  | 7.28830600  | 2.70745700  |
| C | 3.43673400  | 0.74275700  | 2.62408300  | H  | 0.89634100  | 1.01791000  | -0.40803200 |
| C | 3.96799200  | 2.12041300  | 2.99968400  | H  | -0.81548600 | 1.17247200  | -0.82690500 |
| O | 3.39768300  | 3.08656700  | 2.35168700  | H  | 1.01754800  | 3.74951400  | 0.62659600  |
| O | 4.89596200  | 2.23790600  | 3.81590300  | H  | -1.54975100 | 3.05553000  | 3.89330800  |
| C | -3.34291700 | 9.06302000  | 0.02593000  | H  | -3.30101000 | -1.54740400 | 4.40125800  |
| C | -2.80646400 | 8.07753900  | 1.02012500  | H  | -3.40498100 | 0.12336600  | 3.80757600  |
| N | -3.45603200 | 7.78137200  | 2.20950000  | H  | -3.47929200 | -0.68182400 | 6.77845200  |
| C | -1.65216600 | 7.33725800  | 1.07362600  | H  | -4.86388900 | -0.18526300 | 5.82851600  |
| C | -2.69101600 | 6.90680900  | 2.91656100  | H  | 7.61488300  | 3.80143400  | -2.48792500 |
| N | -1.58803000 | 6.61620700  | 2.25231300  | H  | 5.98247300  | 3.40274600  | -2.98488300 |
| C | 0.35515000  | 10.64328300 | 3.42698700  | H  | 4.03695800  | 3.39995600  | -0.66067000 |
| C | 0.97011800  | 9.86655600  | 4.59388800  | H  | 6.49296000  | 6.00810300  | 1.54884700  |
| C | 0.51091200  | 8.41433000  | 4.62387300  | H  | 3.32808500  | -0.50079200 | 0.83013600  |
| O | 0.62912000  | 7.77134400  | 3.51933700  | H  | 3.29827700  | 1.24997200  | 0.52175100  |
| O | 0.05251300  | 7.94730300  | 5.69394100  | H  | 3.90373400  | -0.00674900 | 3.26815100  |
| C | 8.83486200  | 1.30892800  | 3.35408800  | H  | 2.35455900  | 0.72886500  | 2.79675700  |
| C | 9.66045200  | 2.59624600  | 3.50122500  | H  | -4.28141900 | 8.72584700  | -0.43133900 |
| C | 8.86309300  | 3.83888000  | 3.90938300  | H  | -2.61619400 | 9.21634000  | -0.77489500 |
| O | 8.97942900  | 4.86734000  | 3.18985600  | H  | -0.85616200 | 7.29787700  | 0.34426300  |
| O | 8.17968400  | 3.74769800  | 4.97306600  | H  | -2.97181600 | 6.55389800  | 3.89829500  |
| C | 4.05793300  | 10.72608300 | 1.08083100  | H  | 0.76520900  | 11.65854100 | 3.37264000  |
| C | 4.10314100  | 9.37380700  | 1.73260300  | H  | 0.57173300  | 10.13358900 | 2.48493100  |
| N | 4.78109400  | 9.09734000  | 2.91146300  | H  | 0.72814400  | 10.32529800 | 5.55604800  |
| C | 3.58526800  | 8.16077400  | 1.34459600  | H  | 2.06230000  | 9.85642600  | 4.49149600  |
| C | 4.66312800  | 7.77963500  | 3.18374500  | H  | 8.26871500  | 1.08784700  | 4.26196600  |
| N | 3.94398400  | 7.17937900  | 2.24909400  | H  | 8.12806800  | 1.37897100  | 2.52030800  |
| C | 8.01612500  | 10.58504600 | 5.01125900  | H  | 10.41573000 | 2.43930400  | 4.28385800  |
| C | 8.29582300  | 9.63626100  | 6.17232100  | H  | 10.19922600 | 2.81284200  | 2.57326300  |
| C | 7.38699200  | 8.39759300  | 6.15156300  | H  | 3.08231300  | 10.89011200 | 0.61376400  |
| O | 6.66119400  | 8.22009400  | 5.13378700  | H  | 4.81604300  | 10.81382900 | 0.29185000  |
| O | 7.44908600  | 7.64241900  | 7.16449500  | H  | 2.98285300  | 7.94074900  | 0.47542300  |
| C | -4.35862800 | 9.22912300  | 6.55005800  | H  | 5.14442200  | 7.31599600  | 4.03023800  |

|   |             |             |             |   |             |             |             |
|---|-------------|-------------|-------------|---|-------------|-------------|-------------|
| H | 8.62080100  | 11.49814300 | 5.07459500  | H | -3.52135000 | 10.00486200 | 0.50172800  |
| H | 8.22708400  | 10.09883500 | 4.05472100  | H | -4.93703000 | 10.11433900 | 6.71460200  |
| H | 8.16577600  | 10.13433400 | 7.14062500  | O | 2.20966400  | 5.31365200  | 3.63157900  |
| H | 9.33496000  | 9.28377800  | 6.15540900  | O | 2.55811000  | 5.21443900  | 5.24430400  |
| H | -3.44792800 | 9.28377300  | 7.15268900  | C | 0.64145400  | 4.57902300  | 9.49734300  |
| H | -4.06961400 | 9.15637500  | 5.49898400  | N | 0.64898400  | 5.58153000  | 8.44049200  |
| H | -5.67322400 | 8.24967100  | 7.97978400  | C | 1.95137600  | 6.13641700  | 8.10365500  |
| H | -6.09788400 | 7.96061500  | 6.28742700  | C | 2.99059300  | 5.20223800  | 7.54147100  |
| H | -1.07325900 | 5.03038300  | 5.57663900  | C | 4.43225600  | 5.59432500  | 7.61826400  |
| H | -0.18769600 | 6.41853000  | 5.57293100  | C | 5.31751300  | 4.76637900  | 6.69415100  |
| H | -2.76473900 | 3.49555400  | 5.80022000  | N | 6.76197400  | 5.13739200  | 6.80287600  |
| H | -2.35953800 | 4.29573200  | 7.13364600  | H | 0.94462800  | 5.04643600  | 10.44403400 |
| H | -3.38804000 | 4.58185200  | 8.73180700  | H | 1.31310900  | 3.71543300  | 9.33290000  |
| H | -3.13733100 | 3.07918500  | 8.36570500  | H | 0.20186600  | 5.21990900  | 7.60463800  |
| H | 5.96340400  | 1.68358400  | 5.40269900  | H | 1.79739500  | 6.96490200  | 7.39696400  |
| H | 7.28427200  | 2.33604300  | 5.75277600  | H | 2.36466400  | 6.60553800  | 9.01530500  |
| H | 8.97995300  | 6.64489800  | 1.03791600  | H | 2.76567500  | 4.13829300  | 7.50121900  |
| H | 9.39978300  | 5.27933800  | 1.49406700  | H | 4.76114000  | 5.48725400  | 8.67114700  |
| H | 7.47416300  | 7.74138000  | 3.46980200  | H | 4.55167300  | 6.65964100  | 7.38153300  |
| H | 8.18144500  | 6.43123800  | 3.09055400  | H | 5.02880300  | 4.95200400  | 5.66280300  |
| O | 5.28505500  | 4.94725400  | 3.65567000  | H | 5.24538100  | 3.69118100  | 6.88124500  |
| H | 5.47929800  | 4.00069400  | 3.84095500  | H | 7.18014100  | 4.71692500  | 7.63280200  |
| H | -3.44418800 | 5.48322300  | 6.02094700  | H | 7.29864100  | 4.75480400  | 5.97615500  |
| H | -1.99059800 | -0.40387700 | 4.73519700  | H | -0.37834500 | 4.20174700  | 9.61099500  |
| H | -0.30051700 | 0.00065300  | 0.36106200  | H | 1.63186600  | 5.01874900  | 5.49279100  |
| H | 4.79102200  | 0.45035200  | 0.97418300  | H | 6.93751900  | 6.20798900  | 6.87847300  |
| H | 6.95073900  | 2.23552200  | -2.15423600 | H | -4.34384100 | 8.14958000  | 2.51608500  |
| H | 9.52471500  | 0.51314900  | 3.16130500  | H | 5.37708000  | 9.69765600  | 3.46619400  |
| H | 6.98175000  | 10.85916300 | 5.02422300  | H | 7.93063700  | 5.04750900  | -0.15537300 |
| H | 4.23037200  | 11.53008100 | 1.76578400  | H | -1.63716500 | 1.04169100  | 2.43345400  |
| H | -0.70681700 | 10.72933900 | 3.52654800  |   |             |             |             |
